# Supplementary material for: An automated Genomes-to-Natural Products platform (GNP) for the discovery of modular natural products
Source: PubMed Central journal article supplement (PMC4598715; doi:10.1038/ncomms9421), 2015-09-28
Supplement: ncomms9421-s1.pdf [file ncomms9421-s1.pdf]

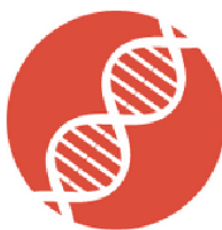

## Genome Search

Detect biosynthetic clusters in a genome and predict nonribosomal peptide and polyketide products

### Sequence

Upload a sequence file in FASTA format. A [sample cluster](#) is provided.

Choose file

Streptomyces Calvus Contigs.txt

What kind of sequence is this?

- Whole genome  
 Cluster or contig (DNA)  
 Cluster (protein multi-FASTA)

### Window

Specify the maximum length between orfs, in base pairs, to consider them part of the same biosynthetic cluster.

10000

bp

### Cutoffs

Specify cutoff values for domain analysis scores below which results will be considered false positives, and will not be considered for combinatorialization or included in the generation of predicted structures. Default values are suggested.

Global cutoff:

75

Thiolation/thioesterase domain cutoff:

15

Adenylation domain cutoff:

200

Acyltransferase domain cutoff:

200

Fatty acyl-AMP ligase cutoff:

500

Submit

**Supplementary Figure 1** GNP's genome search functionality. As a standard initiating step for the Genomes-to-Natural products Platform, users are prompted to upload gene sequence files in FASTA format. These genomes are analyzed by GNP, which detects PKS and NRPS gene clusters and generates predicted structures automatically.

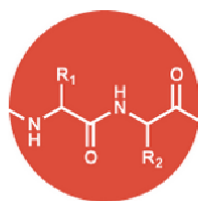

## Scaffold Library Generator

Combinatorialize a single scaffold or a database of scaffold structures for iSNAP database search

### Step 2: Select sites of variability

Replace atoms or moieties of the scaffold molecule with numbered R groups (e.g. R1, R2, R3, etc.) using the 'X' tool. The indices of your R sites must be a series of consecutive integers beginning at 1. Each scaffold must contain at least 1 R group.

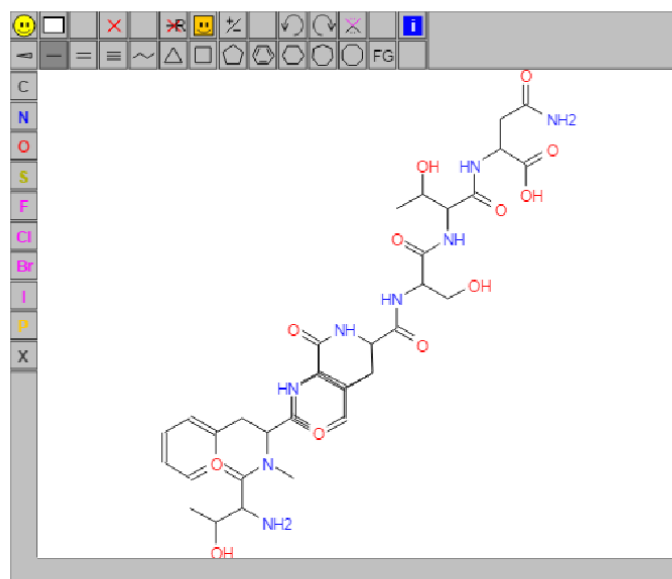

Scaffolds:

Scaffold #1

**Supplementary Figure 2** GNP's scaffold library generator. Following either the automated generation of predicted scaffolds, or the uploading of a user-defined scaffold, predicted structures are combinatorialized at a number of sites defined by R-groups. Combinatorialized libraries are forwarded onwards for use in detecting predicted structures within LC-MS/MS data.

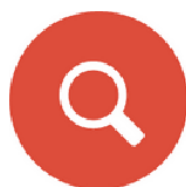

## GNP Database Search

Upload a database of molecules to identify known and predicted compounds within a LC-MS/MS chromatogram

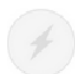

### Mass spectrometry settings

#### Mass spectra

.mzXML format is accepted. An [example .mzXML file](#) is provided. The input can be either a full LC-MS/MS or simply a series of MS/MS scans. In order to achieve better results, we suggest a basic pre-processing for the input spectra prior to analysis.

\*1. All peaks in MS/MS scans are centroided.

\*2. Isotopic peaks of MS/MS fragments are NOT removed.

CalvusExtract.mzXML

#### Fragment intensity filter

Specify the minimum relative intensity for an MS2 fragment peak to be considered in peak matching. GNP refines the input MS2 spectra by removing peaks with intensity below this filter.

%

#### Precursor m/z tolerance

Specify the window size to filter the database for each MS/MS scan. Only the database structures within the mass window will be scored.

±Da

#### Precursor charge

GNP fetches the charge state of MS/MS scan precursor ions from the input mzXML files. GNP will process a MS/MS scan multiple times, using all charge states in the specified range.

to

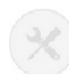

### Theoretical fragmentation settings

#### Database

The built-in NRP database contains ~1100 NRP structures compiled from Antibase and the Dictionary of Natural Products. Users can also define compounds to be included in a search.

- Built-in NRP database
- Built-in antibiotic database
- Built-in ribosomal peptide database
- User-defined compounds

#### User-defined NRP compounds

.txt format is accepted. An [example NRP file](#) is provided. Upload a text file that defines a list of user NRP compounds by SMILES code. Each compound takes one line, with the exact format:

**#define \$NAME = SMILES**

Calvus Combinatorialized Library.txt

#### Prediction guided discovery

Optionally generates a GNP prediction guided discovery chart for user-defined compounds (see publication for description).

- Create prediction guided discovery chart

#### Fragmentation rules

Set up rules theoretical fragmentation rules for database structures. Please mark the allowed fragmentation types, and specify the number of sites can be simultaneously cleaved.

- Amide cleavage  to
- Ester cleavage  to

**Supplementary Figure 3** GNP's database search functionality. Following the generation of a library of predicted structures, GNP can automatically detect compounds in relevant LC-MS/MS data. Uploaded mzXML files can be analyzed with predicted structure databases (user-defined compounds), using our established NRP database as a dummy to provide statistical scoring required for assessing hits. Various parameters can be adjusted based on the user confidence in the predicted structures, such as precursor m/z tolerance, which sets a window around a detected ion within which candidate predictions can be assessed for fragment ion matching.

## Results

Your results will expire on December 21, 2014, and will be deleted.

Upload

Done.

Database Search

Generating report...  
Report #3070 of 3070

Reports

Download reports:  
[Download NRP search report](#)  
[Download matched fragment report](#)

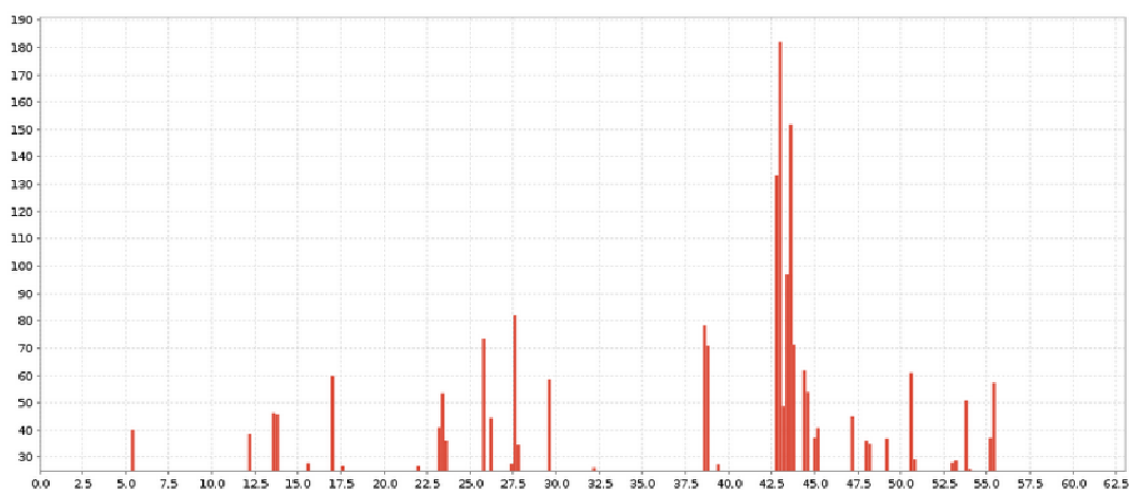

Click labels to sort.

| Scan No.             | RT    | Precursor M/Z | Precursor Charge | Precursor Mass | Result                                          | SMILES ↓                                                                                                                                                                                               | Mass   | Matched Peaks | P1 | P2        |
|----------------------|-------|---------------|------------------|----------------|-------------------------------------------------|--------------------------------------------------------------------------------------------------------------------------------------------------------------------------------------------------------|--------|---------------|----|-----------|
| <a href="#">1088</a> | 17.33 | 508.51        | 2                | 1015.01        | user_#define 1.1_2.1_4.1_6.1_7.1_4.1_5.1_5<br>1 | <chem>C%13(C(C(NC(C(NC(C(NC(C%18O)(NC(C(O)=O)CC(N)=O)=O)C%15O)=O)CC1=CC=C%14C=C1)=O)NC(C(NC(C(C%11(O))NC%10=O)=O)C)CC2=CC=C%12C=C2)=O)C.C%10CCCCCCCC.[H]%11.O%12.C%13C.[H]O.C%14.C%15.C%16.C%17</chem> | 1012.5 | 5             | 10 | 13.4 25.8 |

**Supplementary Figure 4** Results of GNP LC-MS/MS analysis. GNP analysis of LC-MS/MS data using a library of predicted structures yields a prediction guided discovery chart which indicates the frequency of user defined compounds identified as top-scoring hits over time. These compounds are also listed below in an Excel-compatible spreadsheet listing the relevant scan, retention time, precursor charge and mass, as well as the SMILES code and mass for the predicted structure, the number of matched fragment ions, and the statistical parameter scores. Structures of parent and fragment ions are also viewable online by moving the cursor over the relevant SMILES code, though this option must be selected in database search settings.

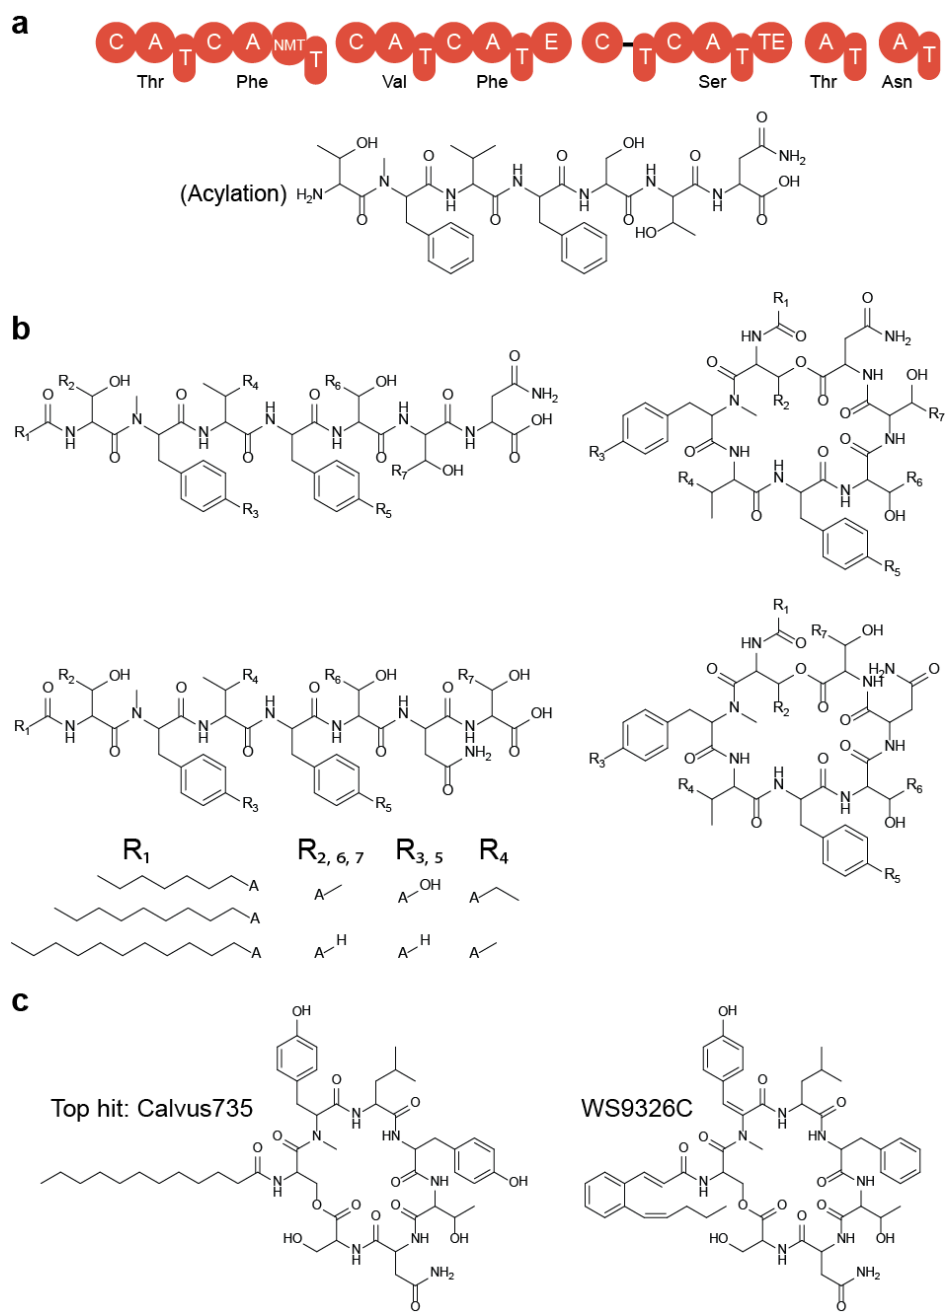

**Supplementary Figure 5** Prediction, combinatorialization, and detection of WS9326 metabolites. **(a)** GNP detected NRPS biosynthetic gene cluster from *Streptomyces calvus*, with predicted monomers listed and GNP-generated prediction shown. **(b)** Structures used for combinatorialization, including varied order of the two trans-acting A-T didomains. **(c)** Structure of the most frequent hit detected within the *S. calvus* LC-MS/MS data (*left*), as well as the true associated metabolite, WS9326C (*right*).

Scan 2872 – P1 (24.5) P2 (23.4)

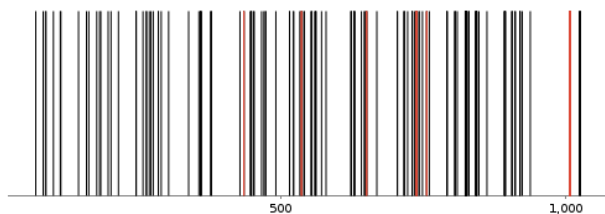

| Top predicted structure hit                                                         | True structure                                                                       |
|-------------------------------------------------------------------------------------|--------------------------------------------------------------------------------------|
| 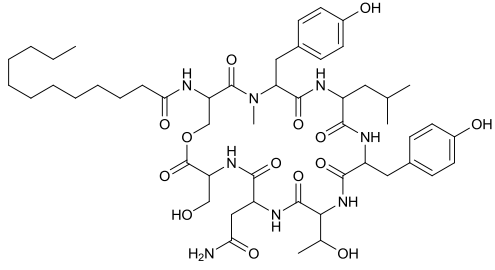   |    |
| Key detected hypothetical fragment                                                  | Proposed corresponding fragment                                                      |
|   |   |
|  |  |
|  |  |
|  |  |

**Supplementary Figure 6** Sample matched fragments between a predicted structure hit and WS9326C. Several matched fragments between the hypothetical compound hit and the corresponding true structure are shown. Fragments of WS9326C were generated using the GNP Fragmenter application. Detected hypothetical spectral fragments are shown as lines in the diagram above, with detected masses shown in red. P-scores for the scan are listed above. Full results tables for this scan and experimental run are available at <http://magarveylab.ca/data/gnp>.

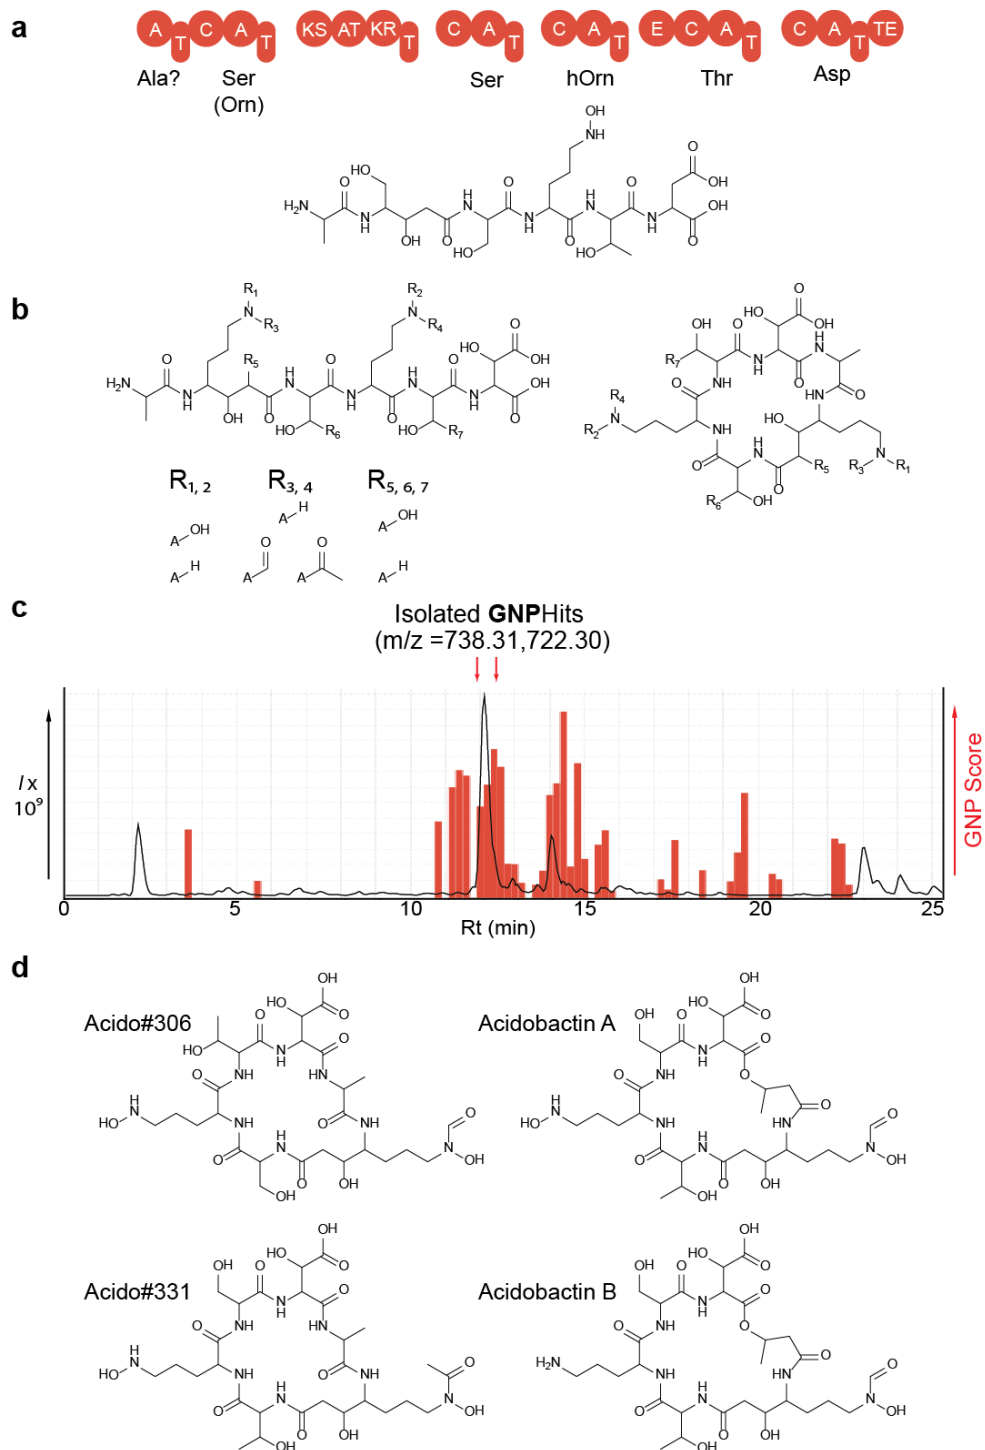

**Supplementary Figure 7** Prediction, combinatorialization, and detection of acidobactin metabolites. **(a)** GNP detected NRPS biosynthetic gene cluster from *Acidovorax citrulli*, with predicted monomers listed and GNP-generated prediction shown. **(b)** Structures used for combinatorialization, taking into account the anticipated ornithine incorporation at position 2. **(c)** Prediction guided discovery chart indicating detected natural products related to the combinatorialized structure library. **(d)** Structures of the most frequent hits associated with the major metabolites from the *A. citrulli* LC-MS/MS data (*left*), as well as the true associated metabolites, acidobactin A and B (*right*).

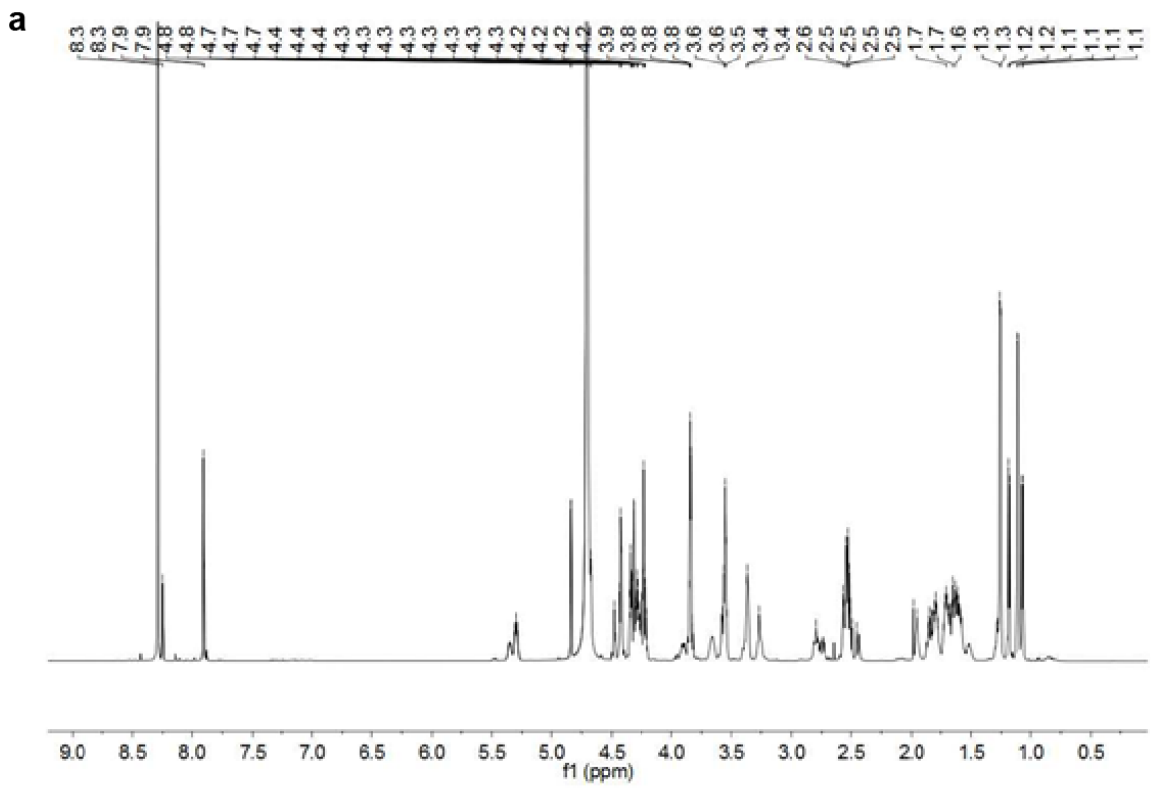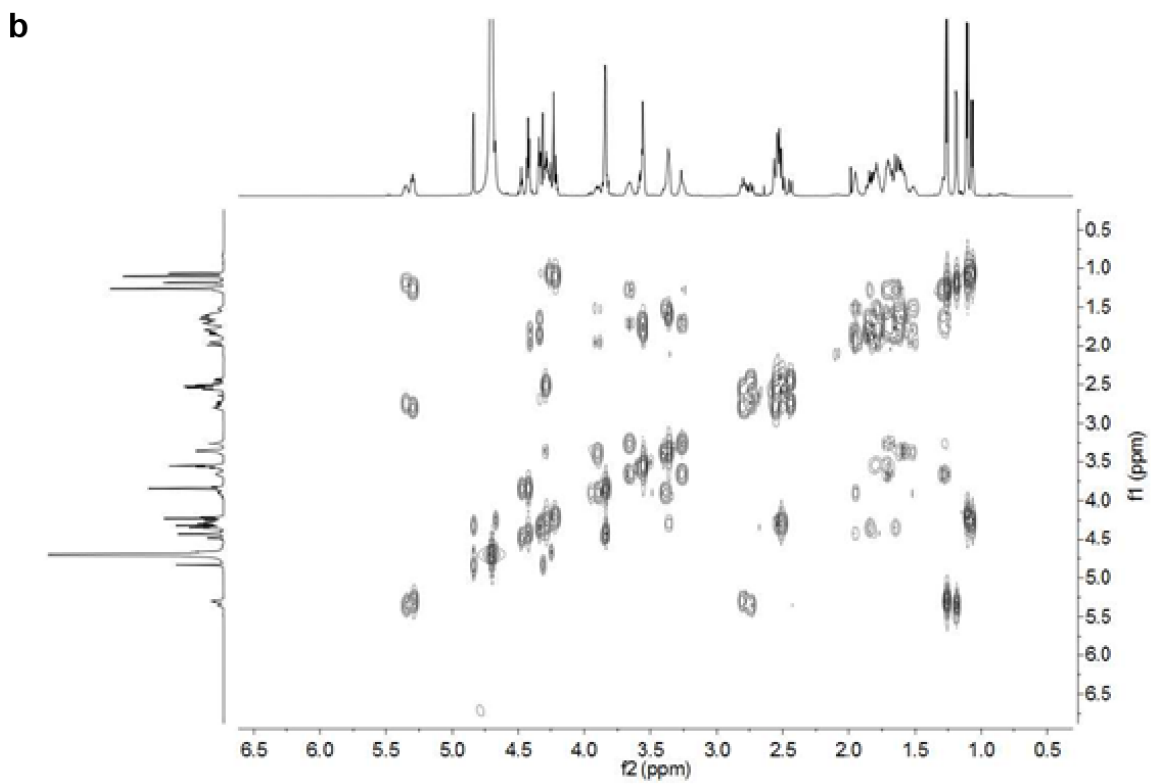



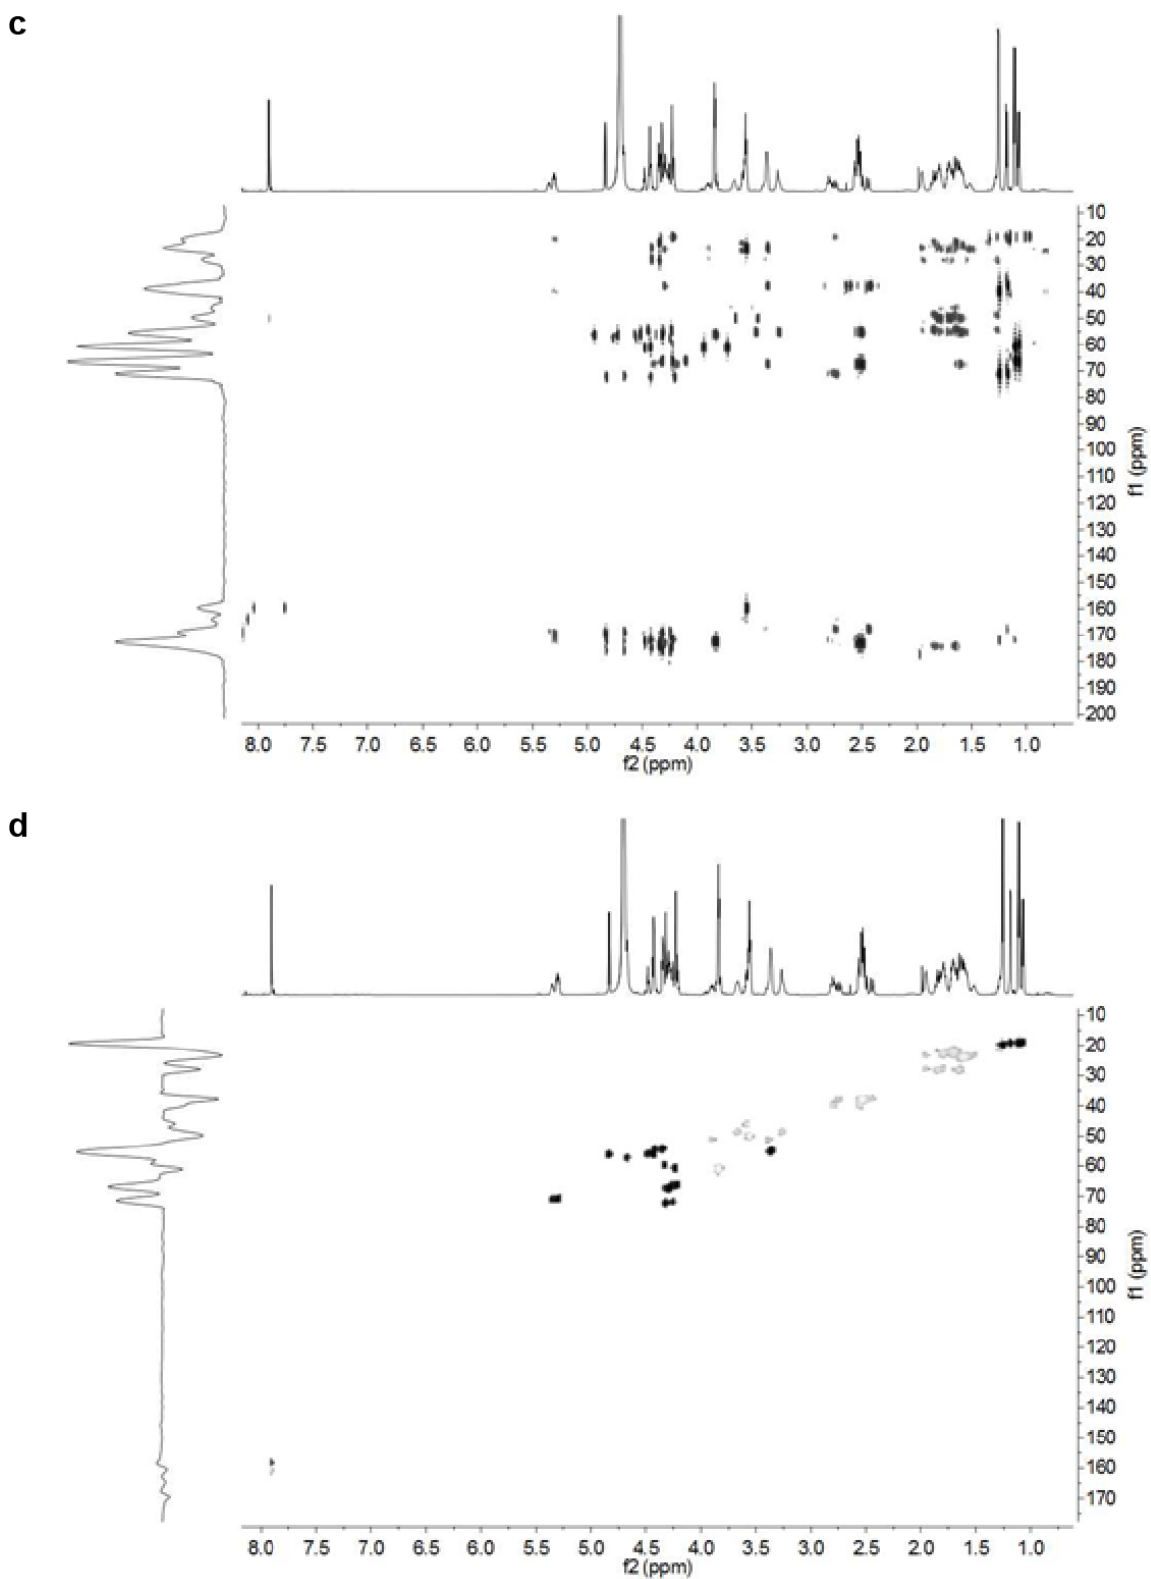

**Supplementary Figure 8** NMR analysis of acidobactin A (**2**) in D<sub>2</sub>O. (a) <sup>1</sup>H NMR spectrum. (b) <sup>1</sup>H-<sup>1</sup>H COSY spectrum. (c) <sup>1</sup>H-<sup>13</sup>C HMBC spectrum. (d) <sup>1</sup>H-<sup>13</sup>C HMQC spectrum.

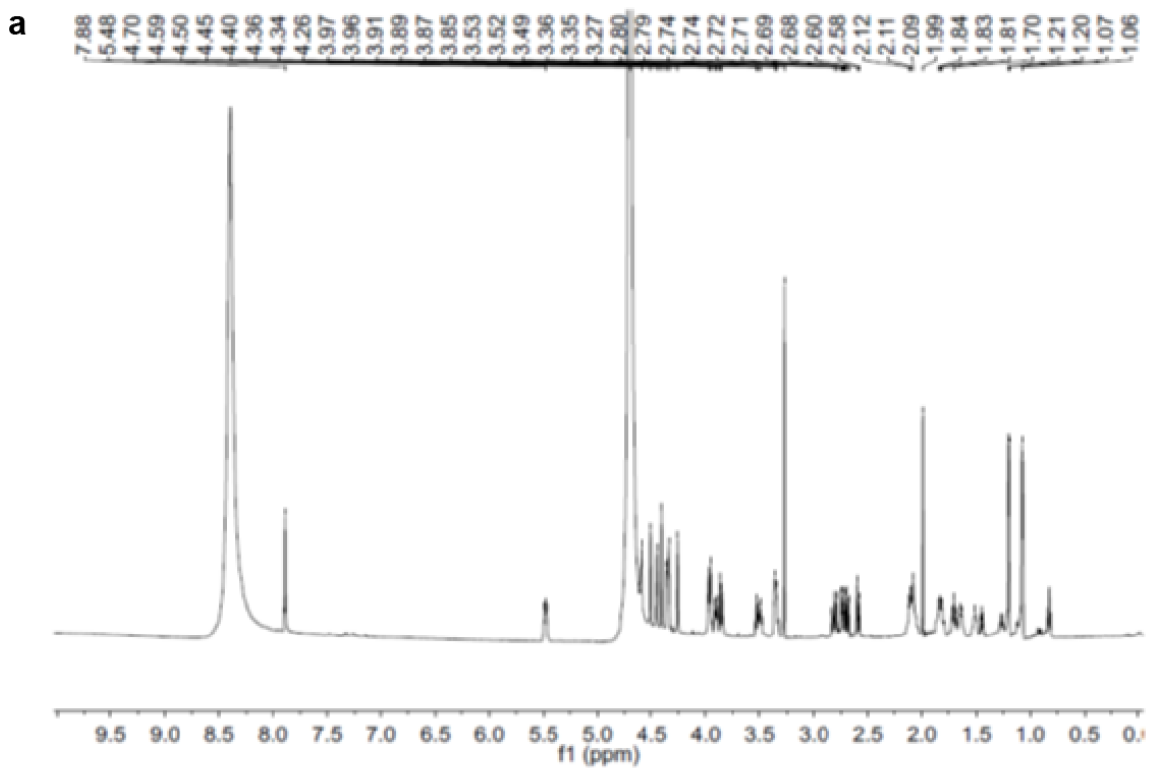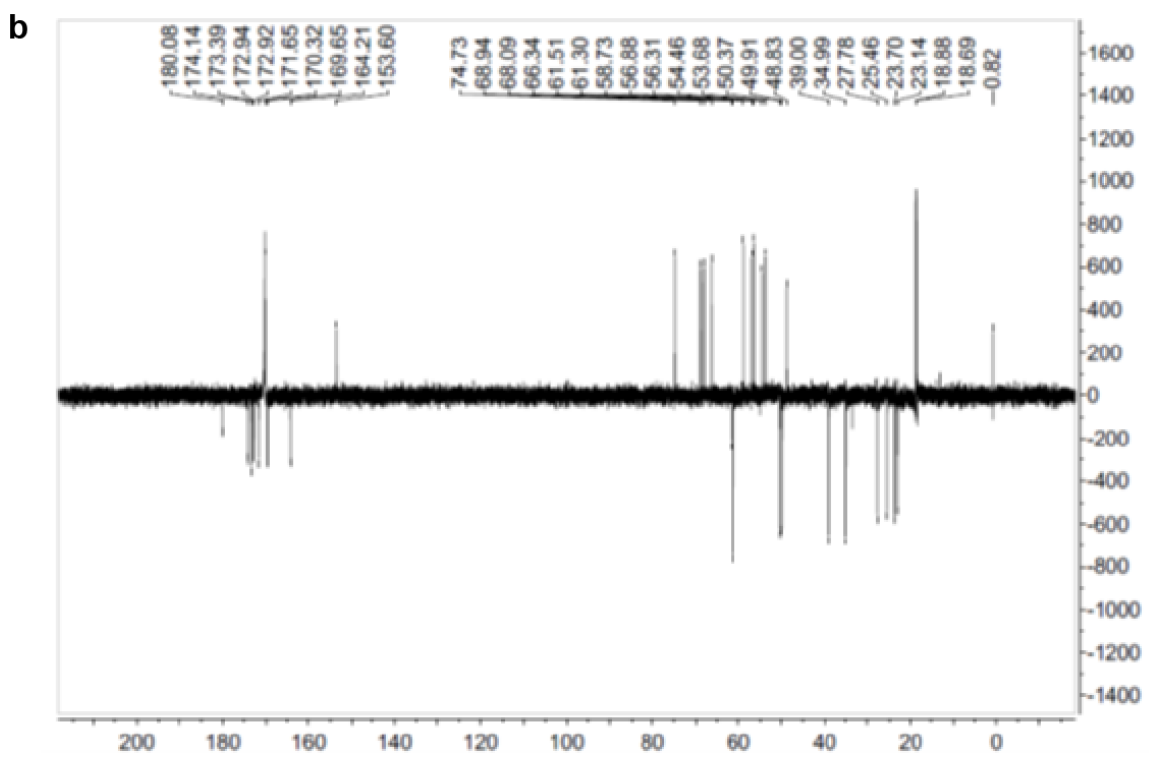

c

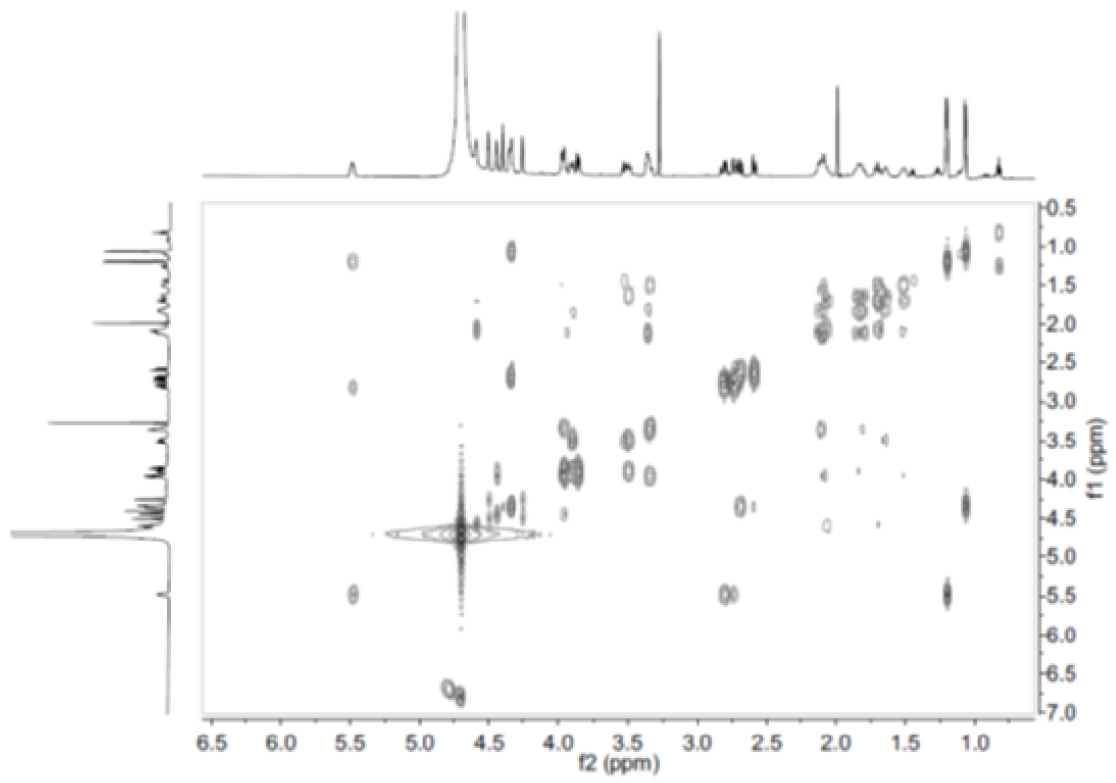

d

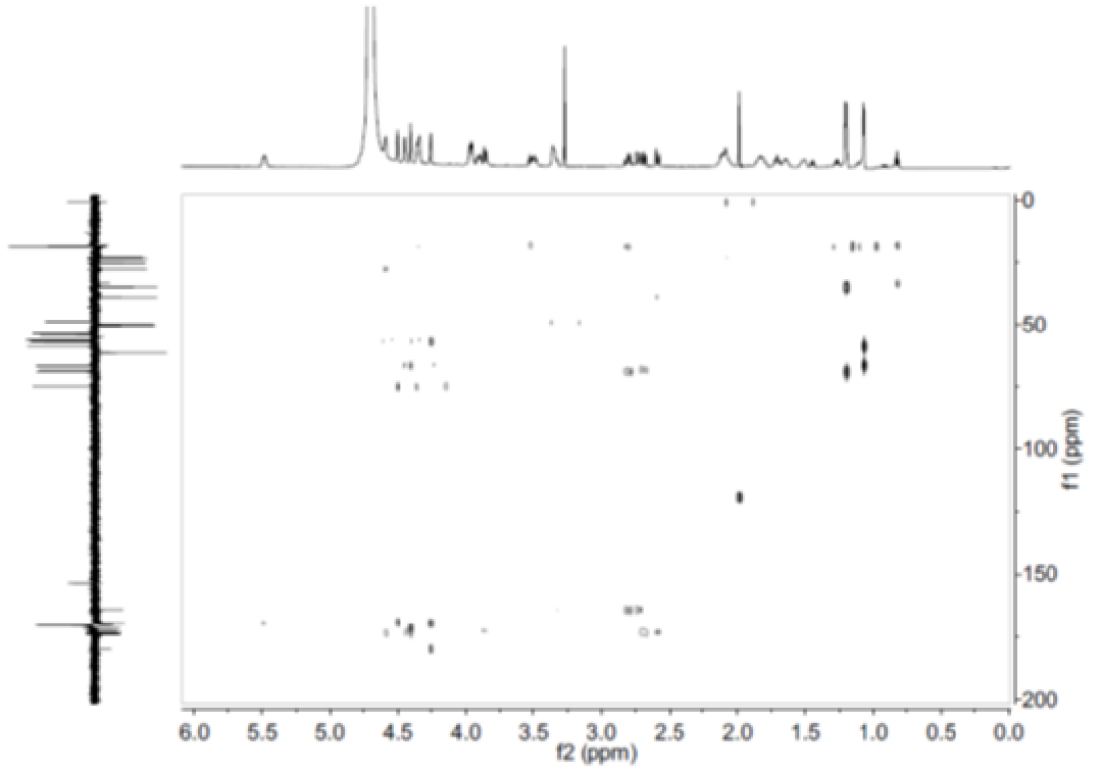

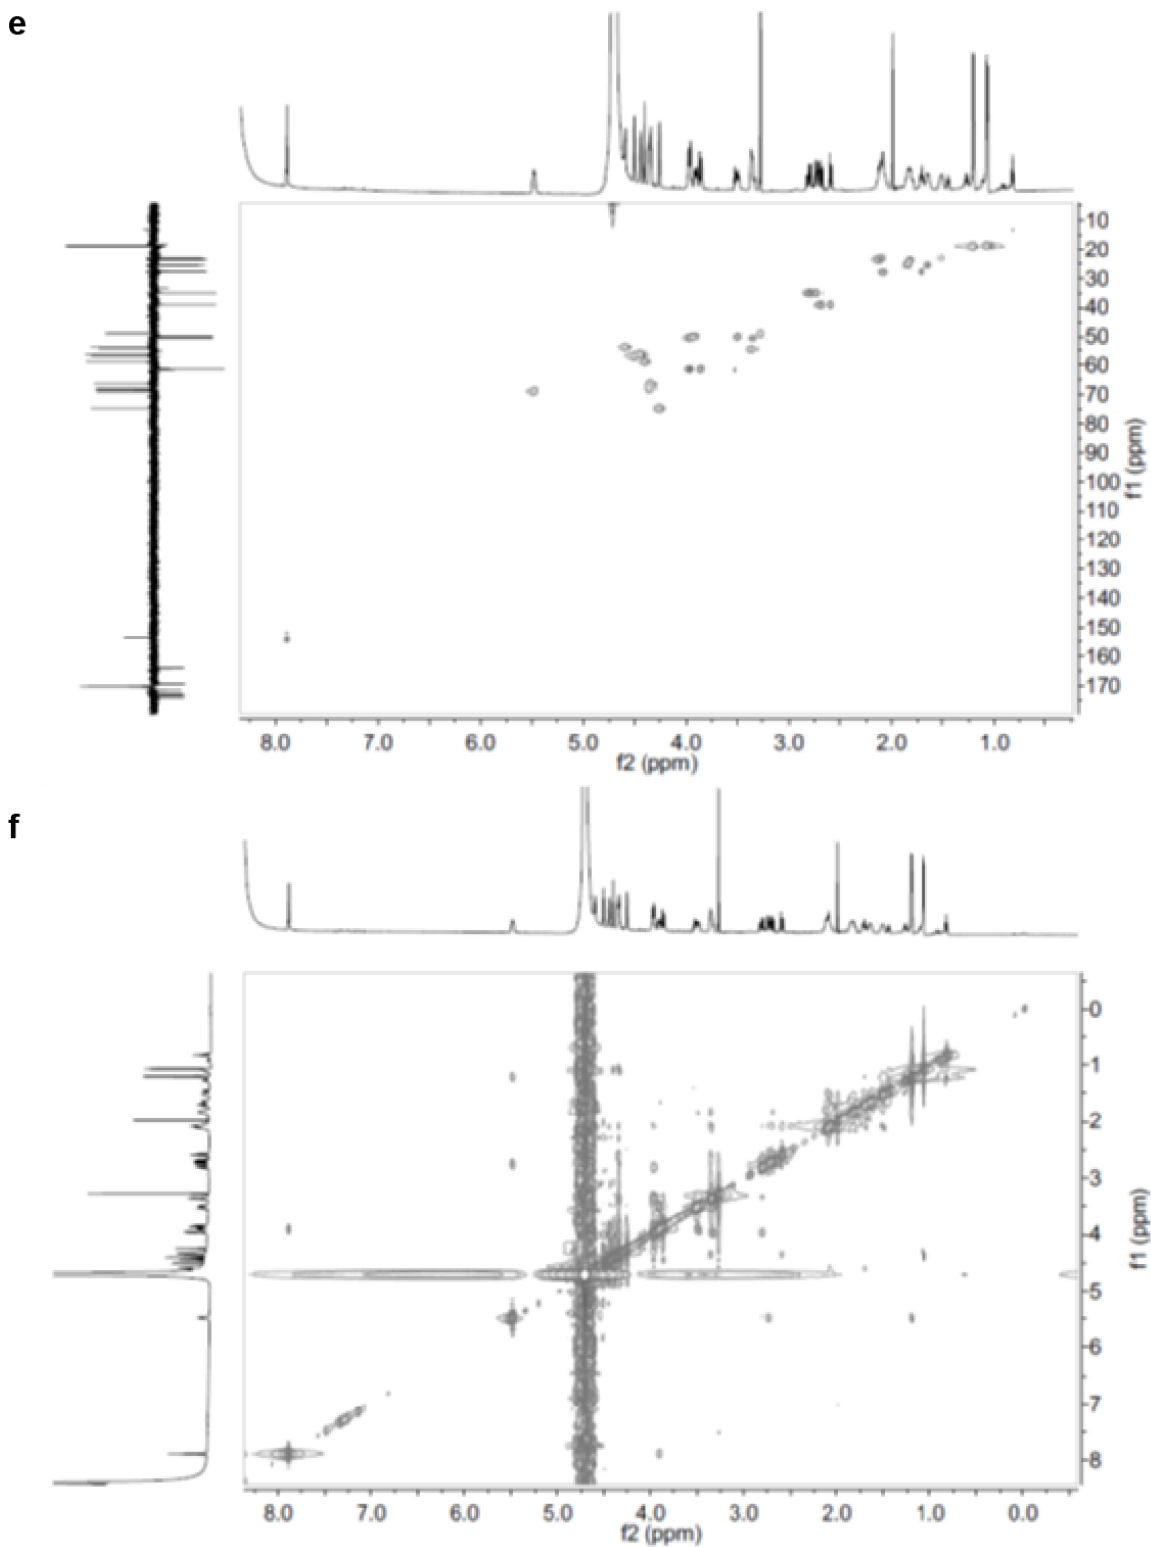

**Supplementary Figure 9** NMR analysis of acidobactin B (**3**) in D<sub>2</sub>O. (a) <sup>1</sup>H NMR spectrum. (b) <sup>13</sup>C DEPTq spectrum. (c) <sup>1</sup>H-<sup>1</sup>H COSY spectrum. (d) <sup>1</sup>H-<sup>13</sup>C HMBC spectrum. (e) <sup>1</sup>H-<sup>13</sup>C HMQC spectrum. (f) <sup>1</sup>H-<sup>1</sup>H ROESY spectrum.

Scan 752 – P1 (21.9) P2(21.9)

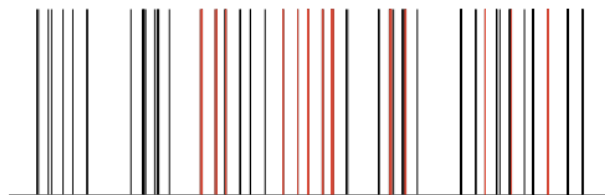

| Top predicted structure hit                                                         | True structure                                                                       |
|-------------------------------------------------------------------------------------|--------------------------------------------------------------------------------------|
| 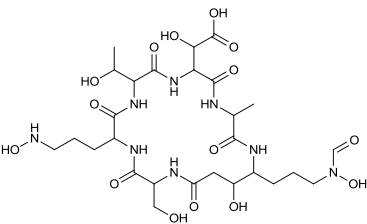   |    |
| Key detected hypothetical fragment                                                  | Proposed corresponding fragment                                                      |
|    |    |
|  |  |
|  |  |
|  |  |

**Supplementary Figure 10** Sample matched fragments between a predicted structure hit and acidobactin A. Several matched fragments between the hypothetical compound hit and the corresponding true structure are shown. Fragments of acidobactin A were generated using the GNP Fragmenter application. Detected hypothetical spectral fragments are shown as lines in the diagram above, with detected masses shown in red. P-scores for the scan are listed above. Full results tables for this scan and experimental run are available at <http://magarveylab.ca/data/gnp>.

Scan 762 – P1 (25.5) P2 (24.2)

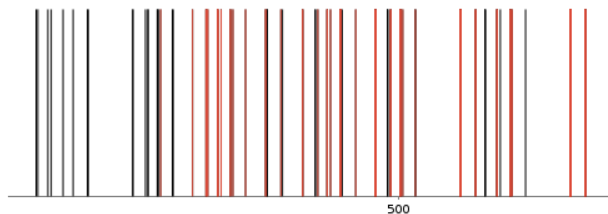

| Top predicted structure hit                                                         | True structure                                                                       |
|-------------------------------------------------------------------------------------|--------------------------------------------------------------------------------------|
| 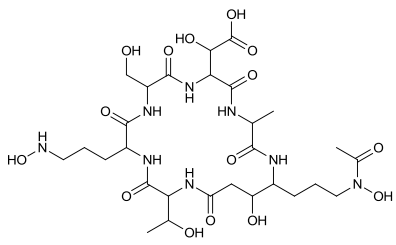   |    |
| Key detected hypothetical fragment                                                  | Proposed corresponding fragment                                                      |
|    |    |
|  |  |
|  |  |
|  |  |

**Supplementary Figure 11** Sample matched fragments between a predicted structure hit and acidobactin B. Several matched fragments between the hypothetical compound hit and the corresponding true structure are shown. Fragments of acidobactin B were generated using the GNP Fragmenter application. Detected hypothetical spectral fragments are shown as lines in the diagram above, with detected masses shown in red. P-scores for the scan are listed above. Full results tables for this scan and experimental run are available at <http://magarveylab.ca/data/gnp>.

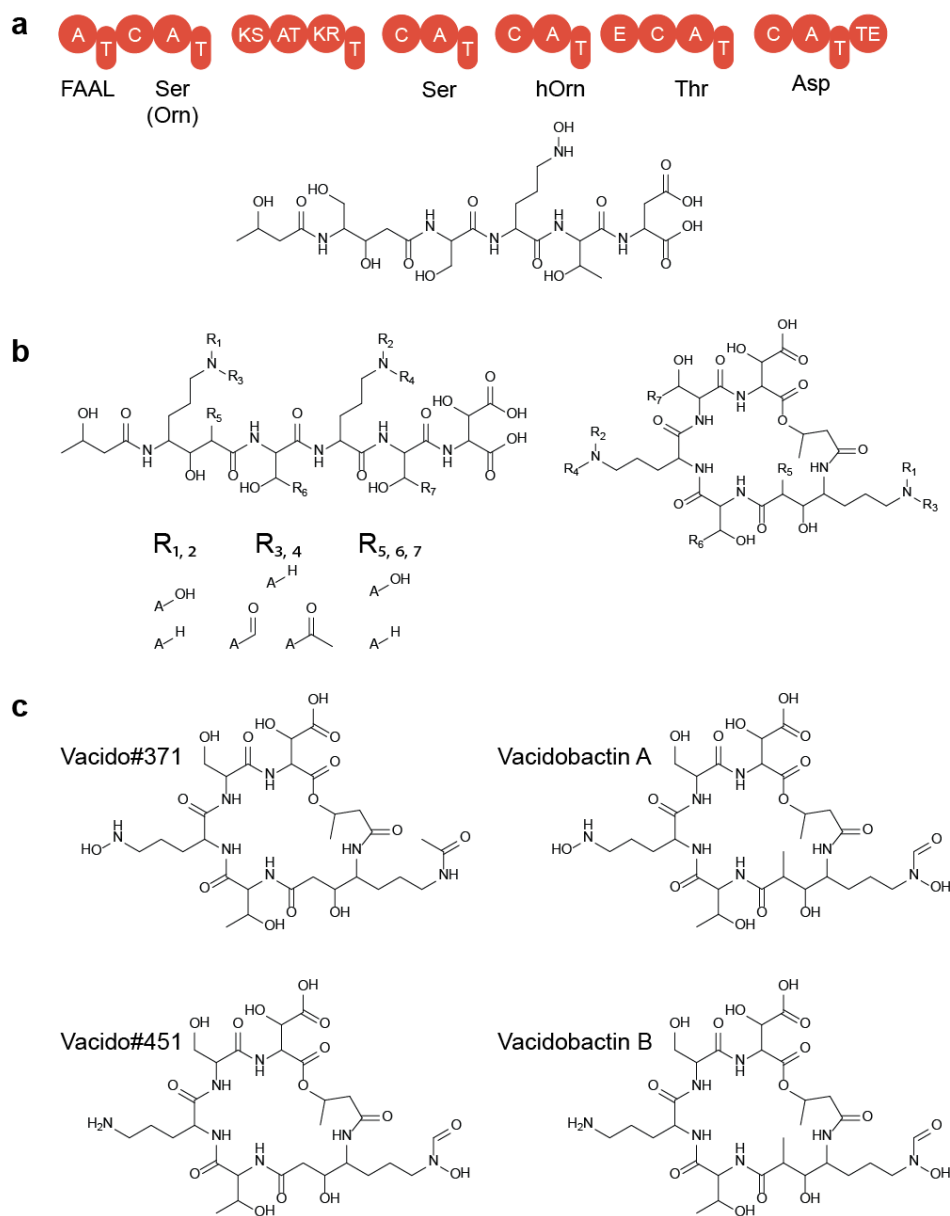

**Supplementary Figure 12** Prediction, combinatorialization, and detection of vacidobactin metabolites. **(a)** GNP detected NRPS biosynthetic gene cluster from *Variovorax paradoxus* S110, with predicted monomers listed and GNP-generated prediction shown. **(b)** Structures used for combinatorialization, taking into account the anticipated ornithine incorporation at position 2 **(c)** Structure of the most frequent hits detected within the *V. paradoxus* S110 LC-MS/MS data (*left*), as well as the true associated metabolites, vacidobactin A and B (*right*).

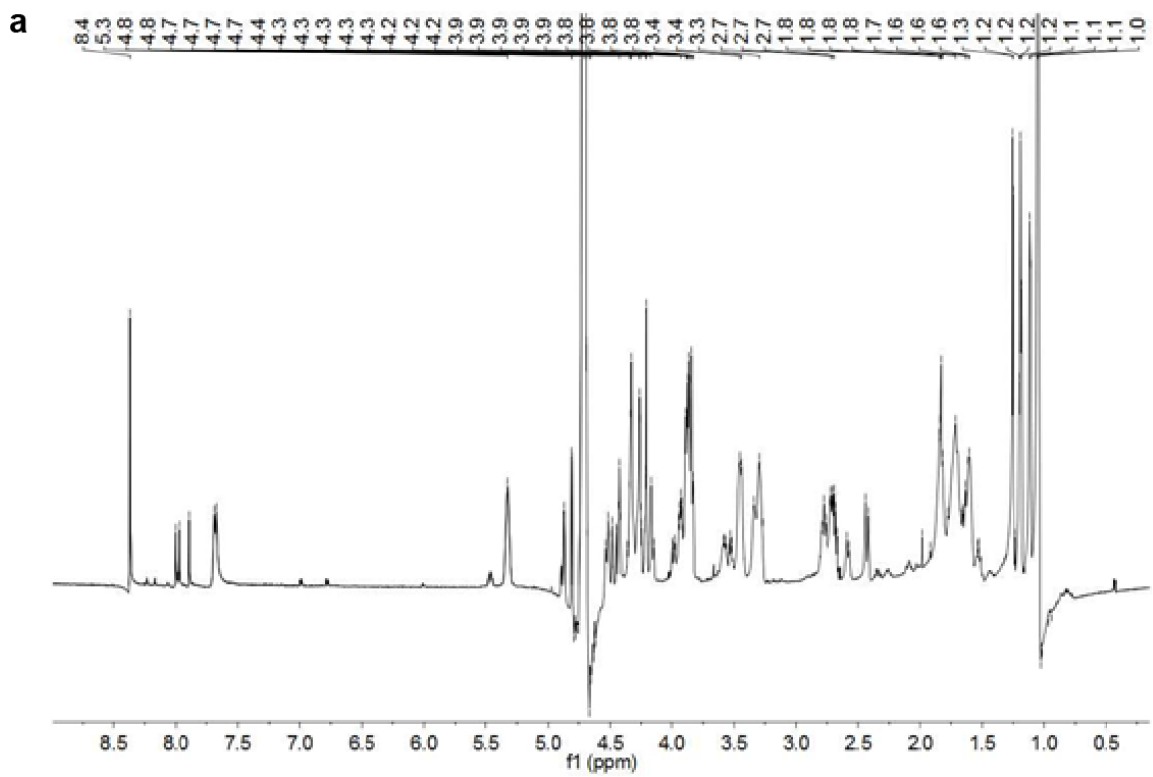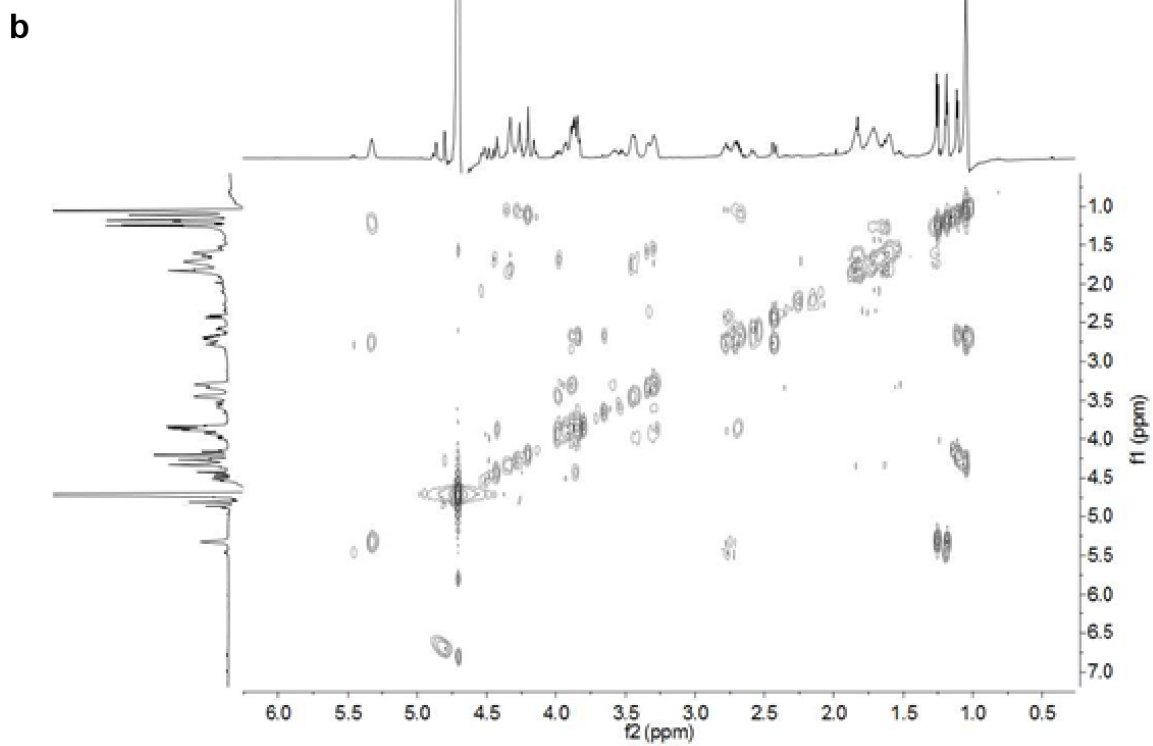



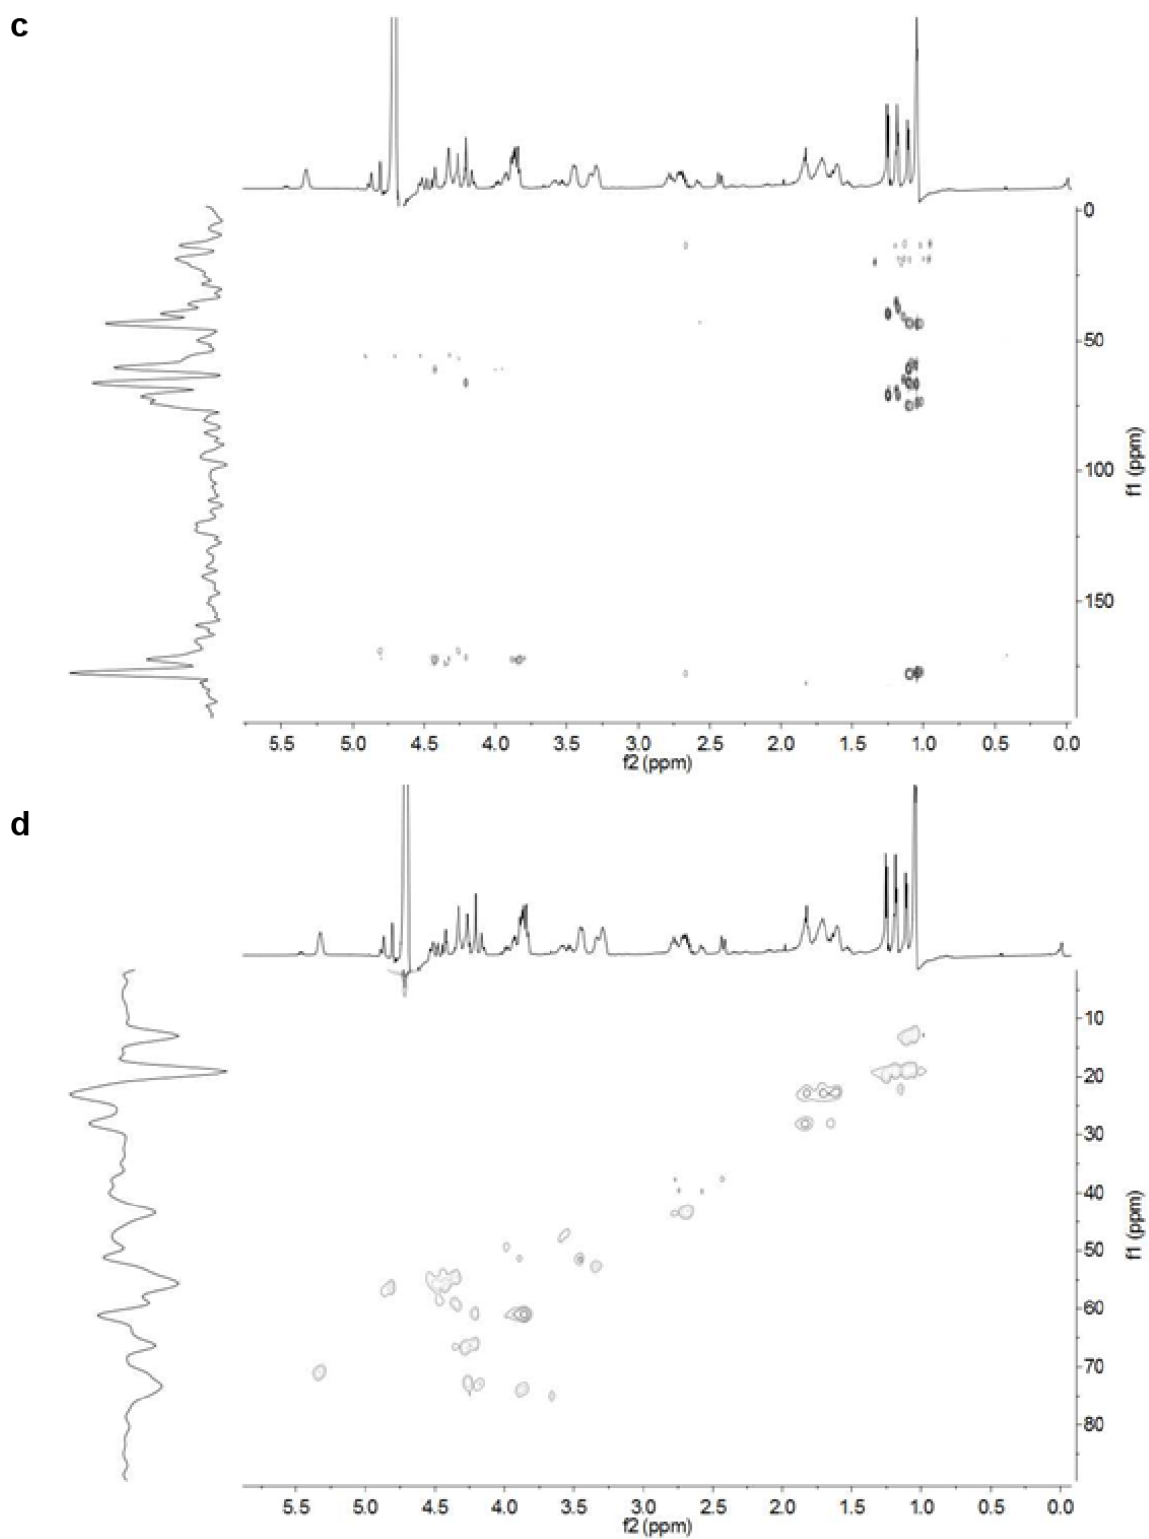

**Supplementary Figure 13** NMR analysis of vacidobactin A (**4**) in D<sub>2</sub>O. (a) <sup>1</sup>H NMR spectrum. (b) <sup>1</sup>H-<sup>1</sup>H COSY spectrum. (c) <sup>1</sup>H-<sup>13</sup>C HMBC spectrum. (d) <sup>1</sup>H-<sup>13</sup>C HMQC spectrum.

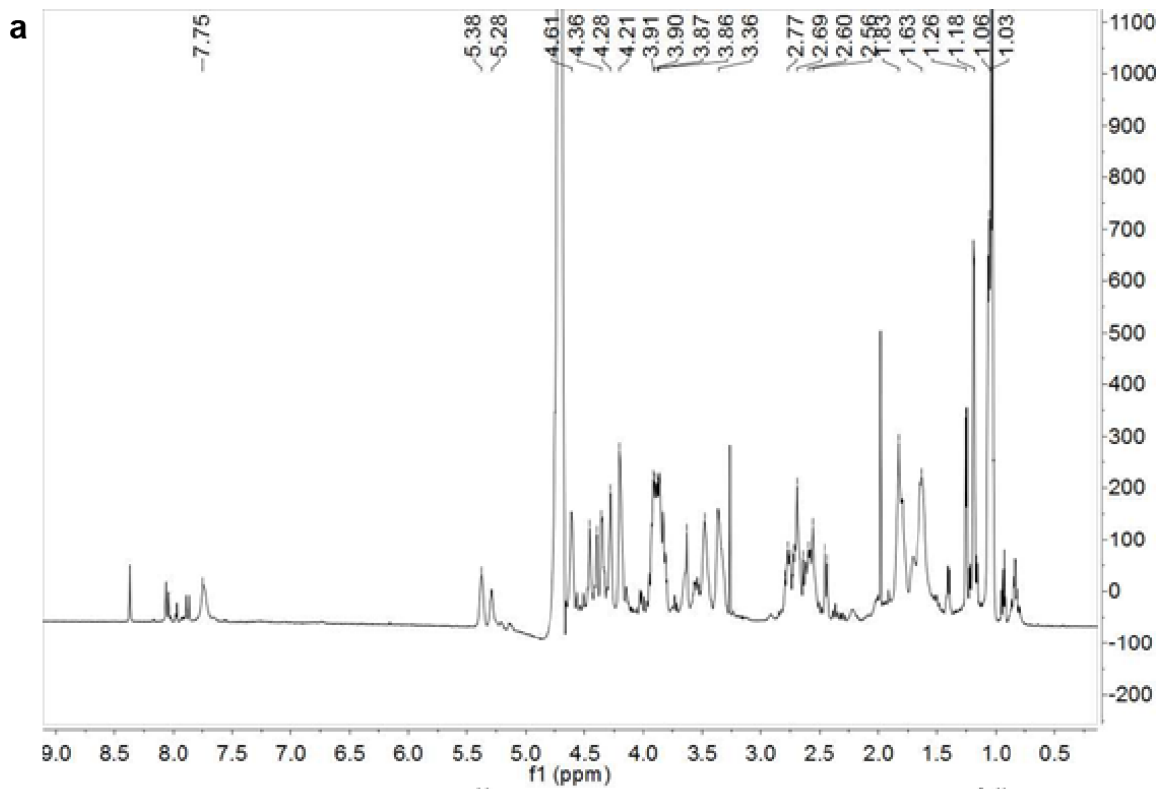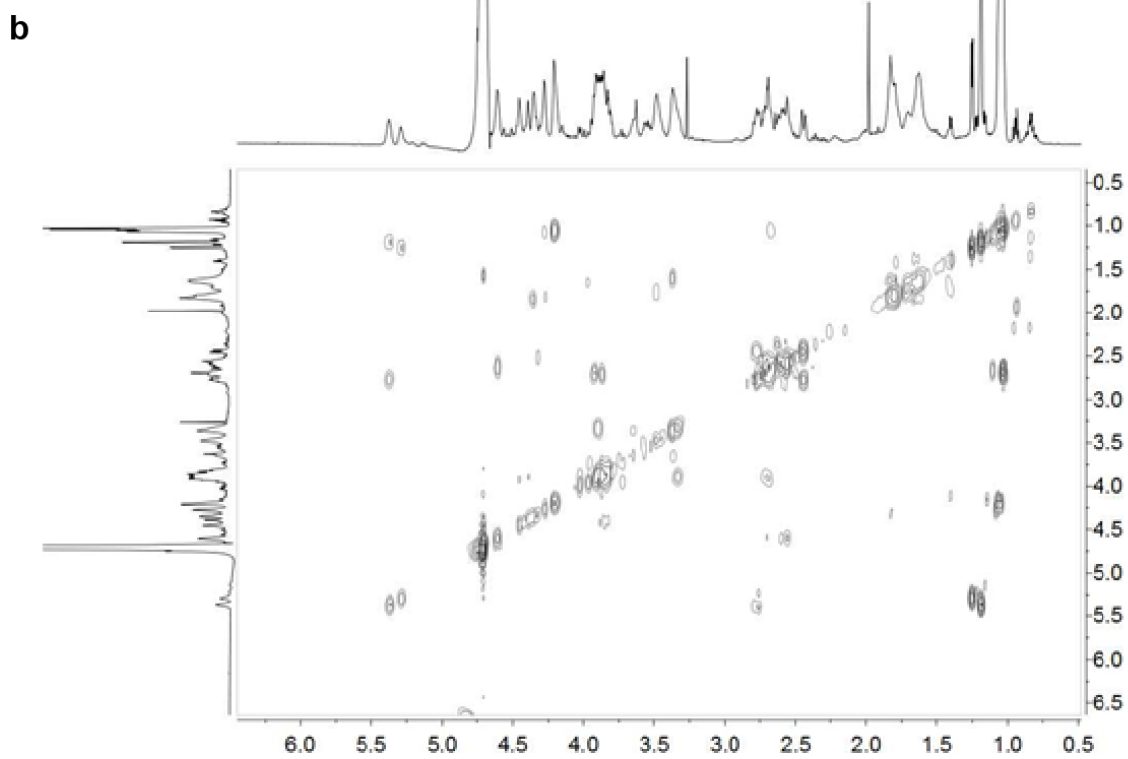

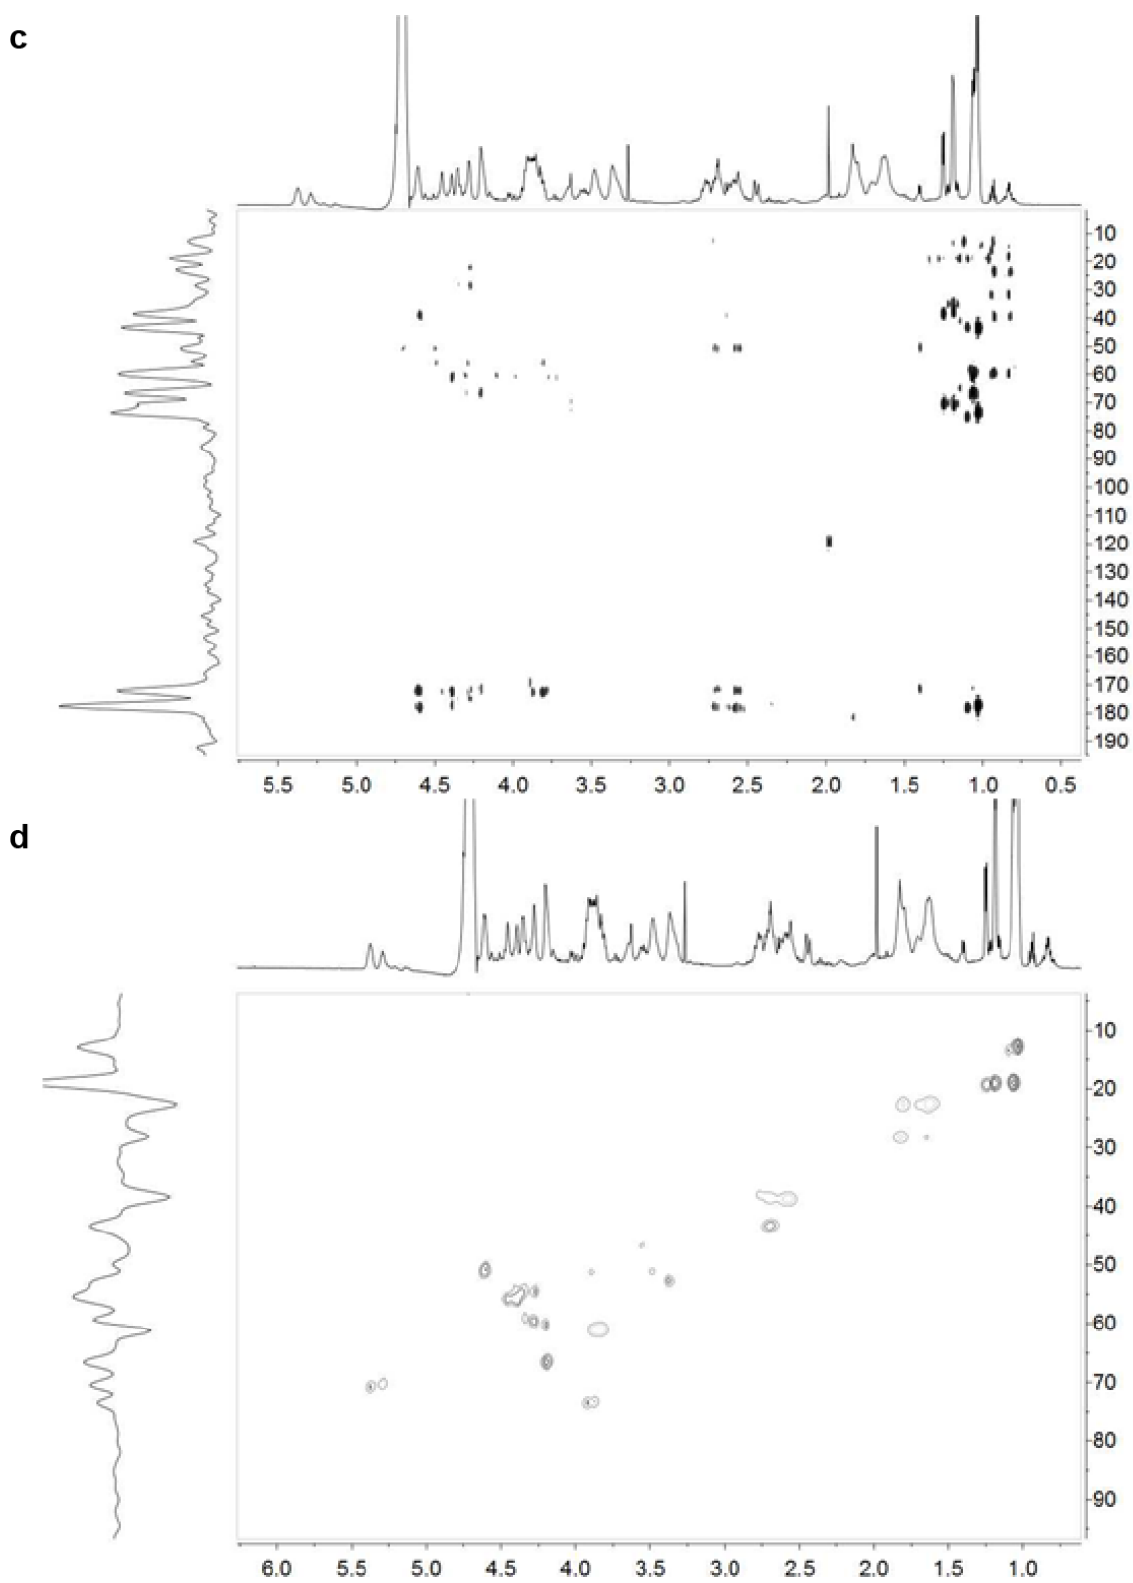

**Supplementary Figure 14** NMR analysis of vacidobactin B (**5**) in D<sub>2</sub>O. (a) <sup>1</sup>H NMR spectrum. (b) <sup>1</sup>H-<sup>1</sup>H COSY spectrum. (c) <sup>1</sup>H-<sup>13</sup>C HMBC spectrum. (d) <sup>1</sup>H-<sup>13</sup>C HMQC spectrum.

Scan 830 – P1 (22.3) P2 (24.6)

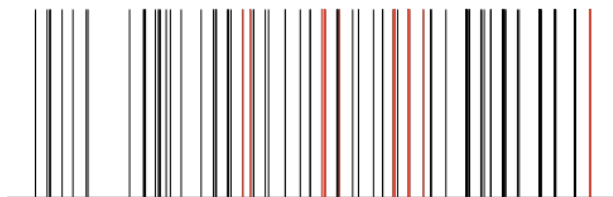

| Top predicted structure hit                                                         | True structure                                                                       |
|-------------------------------------------------------------------------------------|--------------------------------------------------------------------------------------|
| 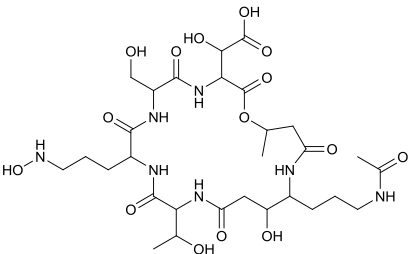   |    |
| Key detected hypothetical fragment                                                  | Proposed corresponding fragment                                                      |
|    |    |
|  |  |
|  |  |
|  |  |

**Supplementary Figure 15** Sample matched fragments between a predicted structure hit and vacidobactin A. Several matched fragments between the hypothetical compound hit and the corresponding true structure are shown. Fragments of vacidobactin A were generated using the GNP Fragmenter application. Detected hypothetical spectral fragments are shown as lines in the diagram above, with detected masses shown in red. P-scores for the scan are listed above. Full results tables for this scan and experimental run are available at <http://magarveylab.ca/data/gnp>.

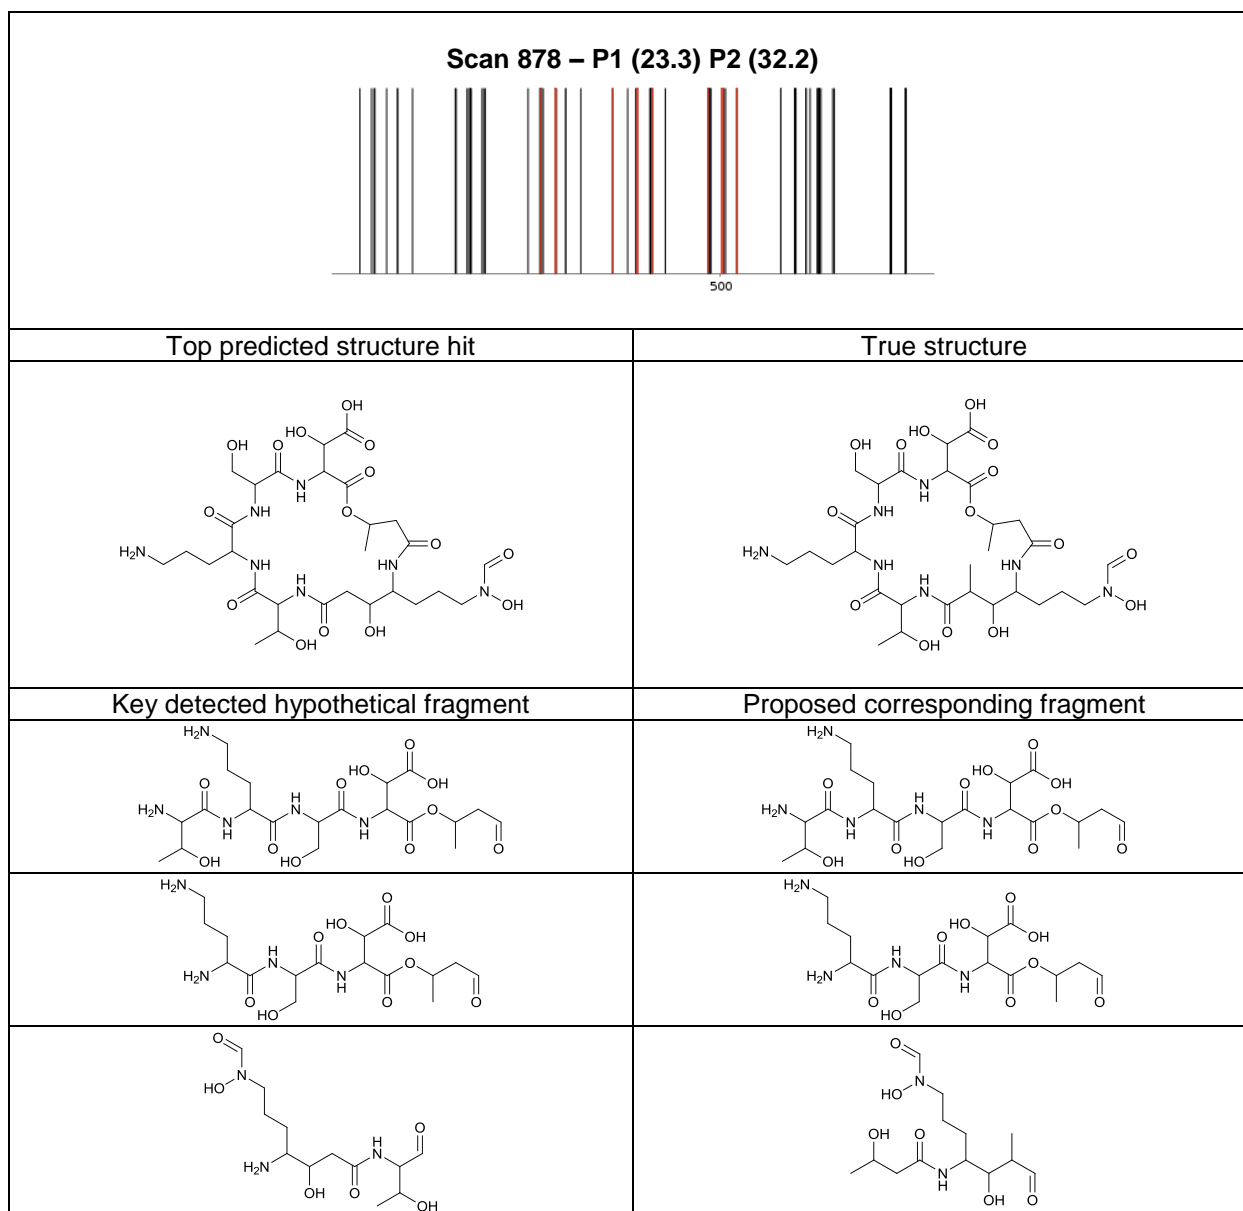

**Supplementary Figure 16** Sample matched fragments between a predicted structure hit and vacidobactin B. Several matched fragments between the hypothetical compound hit and the corresponding true structure are shown. Fragments of vacidobactin B were generated using the GNP Fragmenter application. Detected hypothetical spectral fragments are shown as lines in the diagram above, with detected masses shown in red. P-scores for the scan are listed above. Full results tables for this scan and experimental run are available at <http://magarveylab.ca/data/gnp>.

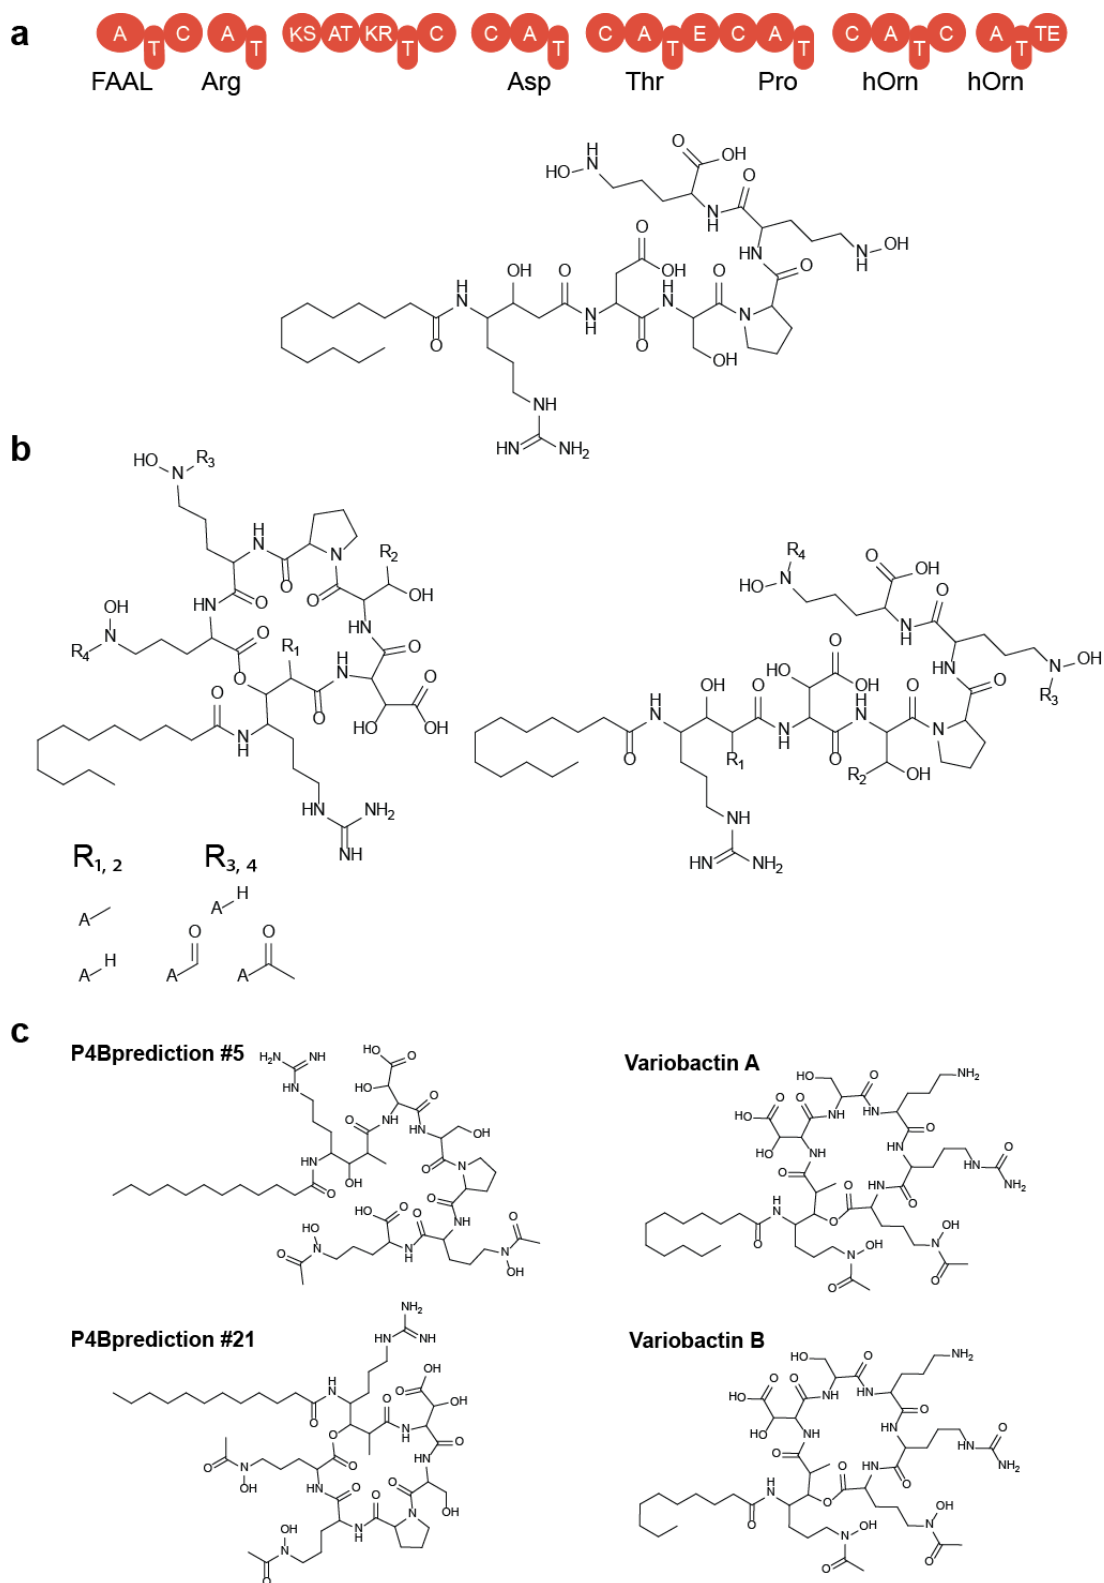

**Supplementary Figure 17** Prediction, combinatorialization, and detection of variobactin metabolites. (a) GNP detected NRPS biosynthetic gene cluster from *Variovorax paradoxus* P4B, with predicted monomers listed and GNP-generated prediction shown. (b) Structures used for combinatorialization. (c) Structure of the most frequent hits detected within the *V. paradoxus* P4B LC-MS/MS data (left), as well as the true associated metabolites, variobactin A and B (right).

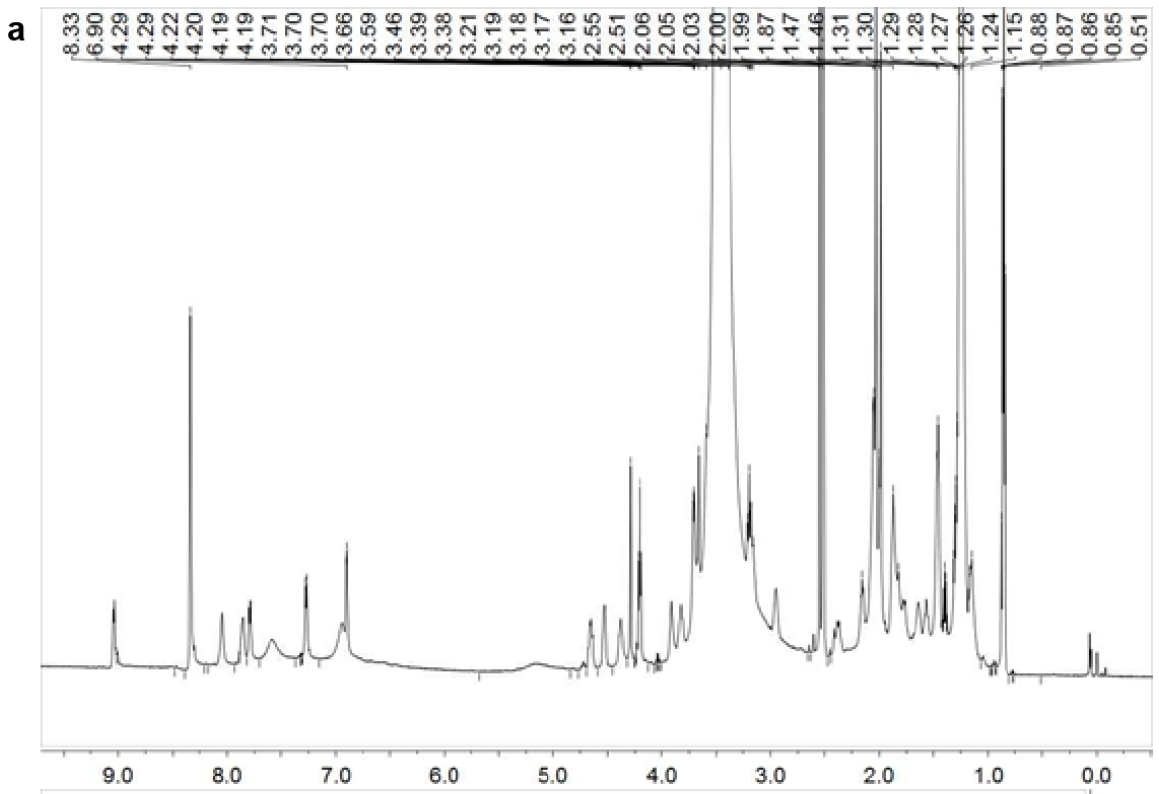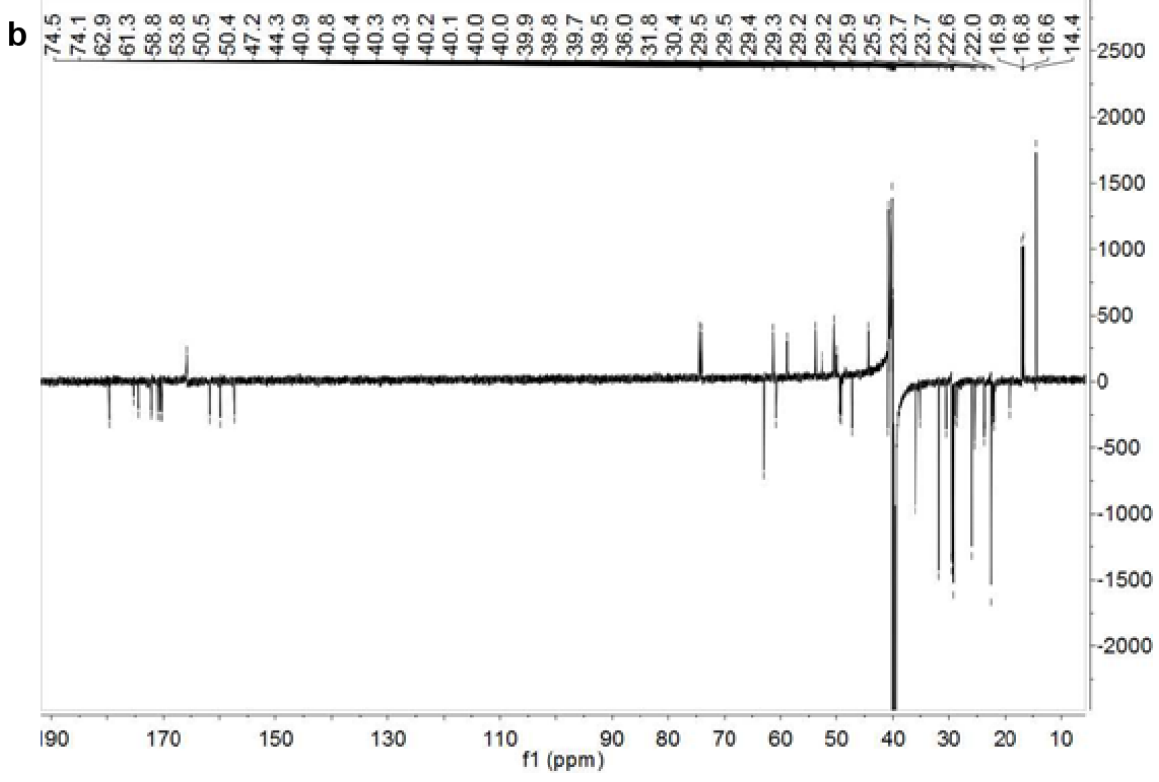

c

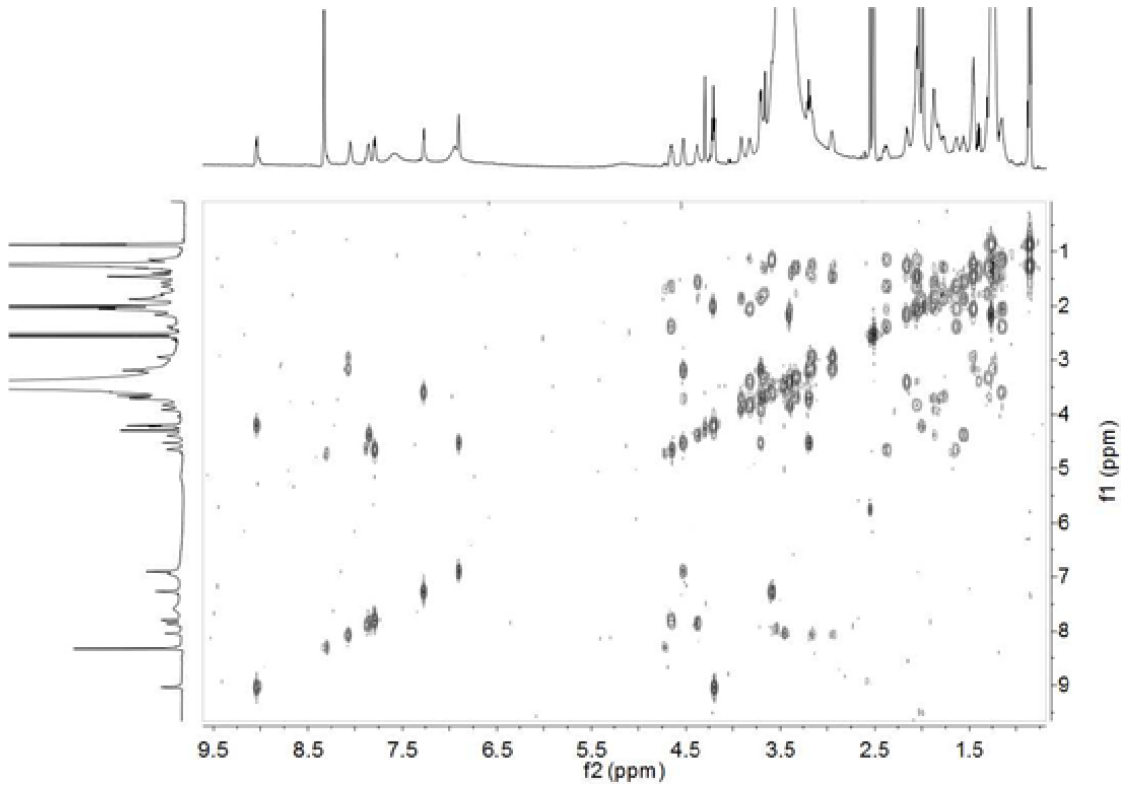

d

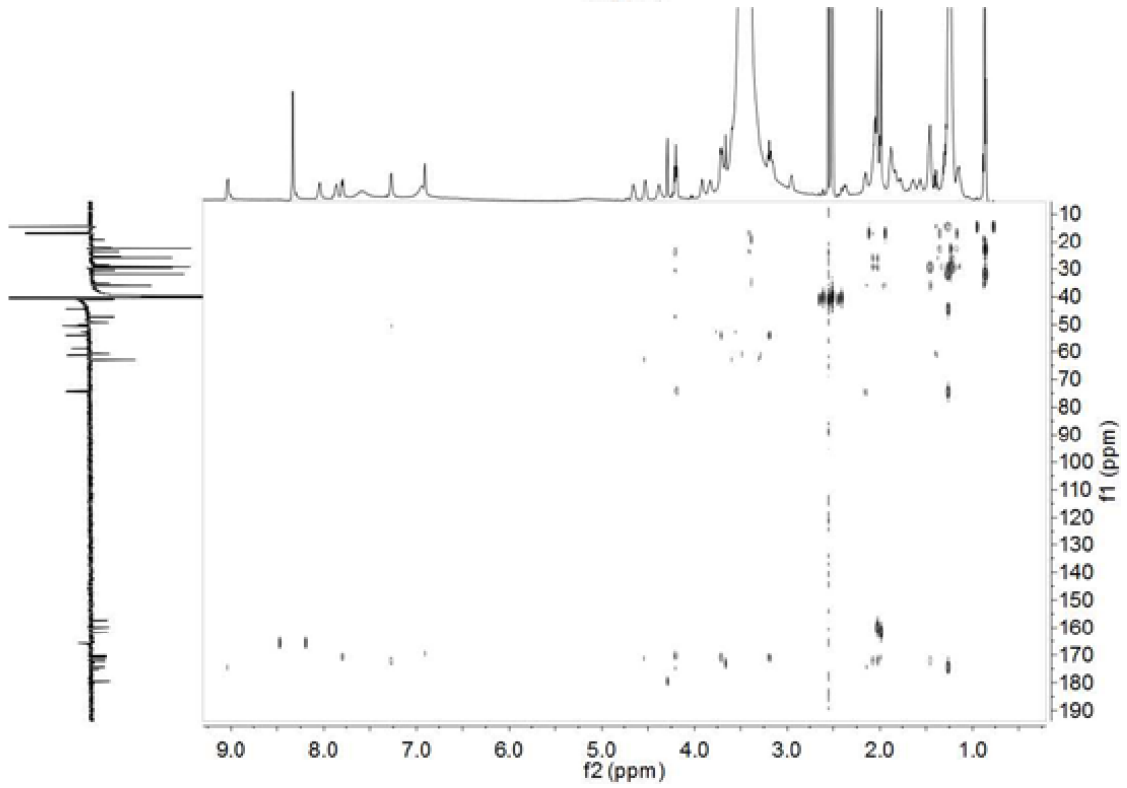



e

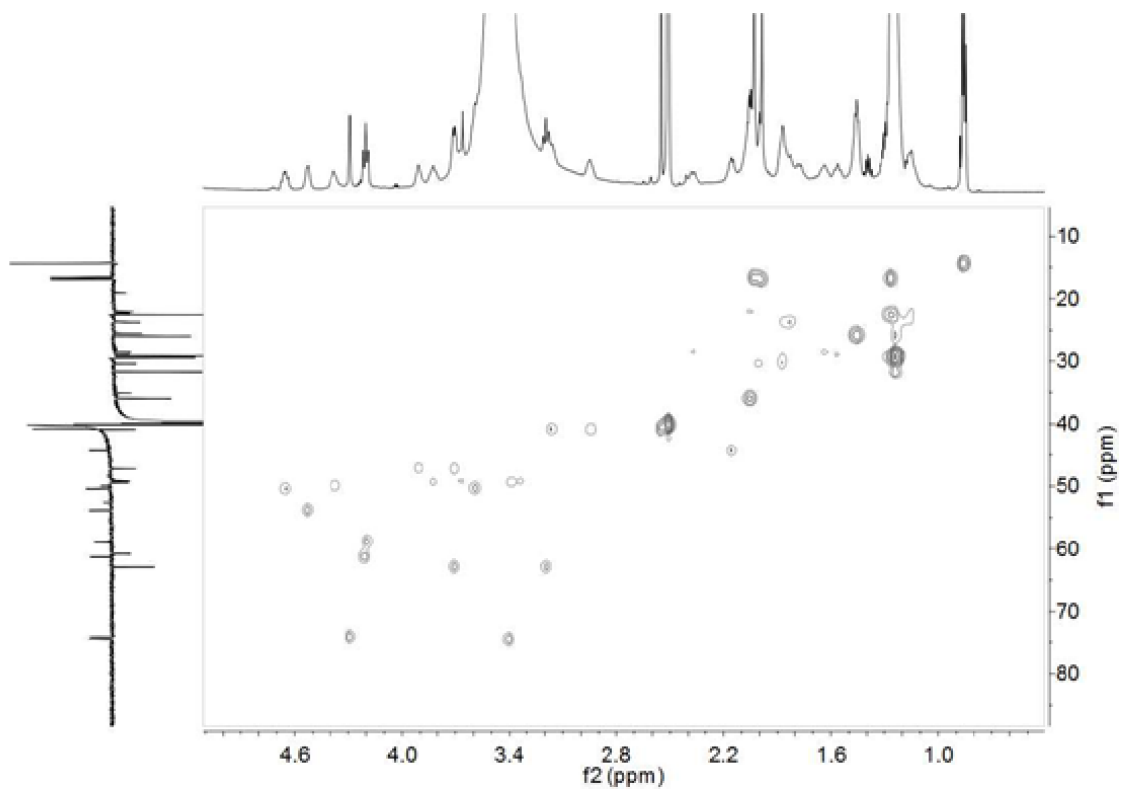

**Supplementary Figure 18** NMR analysis of variobactin A (**6**) in DMSO. (a)  $^1\text{H}$  NMR spectrum. (b)  $^{13}\text{C}$  DEPTq spectrum. (c)  $^1\text{H}$ - $^1\text{H}$  COSY spectrum. (d)  $^1\text{H}$ - $^{13}\text{C}$  HMBC spectrum. (e)  $^1\text{H}$ - $^{13}\text{C}$  HMQC spectrum.

Scan 1252 – P1 (27.4) P2 (53.2)

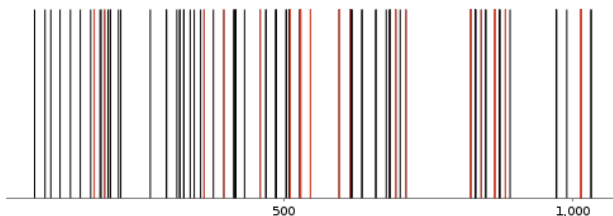

| Top predicted structure hit                                                         | True structure                                                                       |
|-------------------------------------------------------------------------------------|--------------------------------------------------------------------------------------|
| 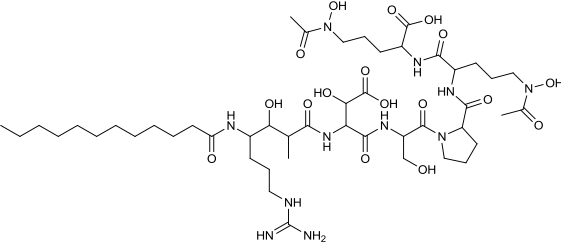   |    |
| Key detected hypothetical fragment                                                  | Proposed corresponding fragment                                                      |
|   |   |
|  |  |
|  |  |
|  |  |

**Supplementary Figure 19** Sample matched fragments between a predicted structure hit and variobactin A. Several matched fragments between the hypothetical compound hit and the corresponding true structure are shown. Fragments of variobactin A were generated using the GNP Fragmenter application. Detected hypothetical spectral fragments are shown as lines in the diagram above, with detected masses shown in red. P-scores for the scan are listed above. Full results tables for this scan and experimental run are available at <http://magarveylab.ca/data/gnp>.

Scan 1107 – P1 (18.4) P2 (21.3)

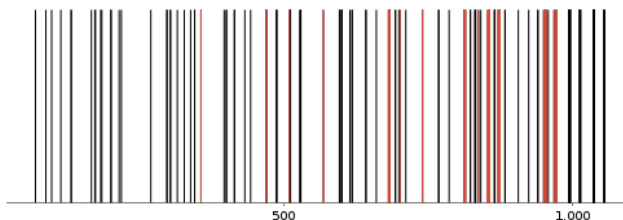

| Top predicted structure hit                                                         | True structure                                                                       |
|-------------------------------------------------------------------------------------|--------------------------------------------------------------------------------------|
| 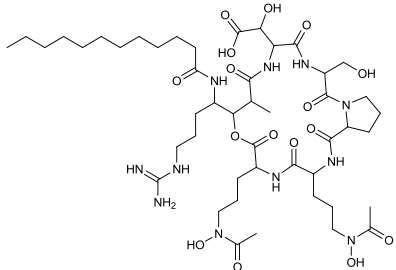   |    |
| Key detected hypothetical fragment                                                  | Proposed corresponding fragment                                                      |
|   |   |
|  |  |
|  |  |
|  |  |

**Supplementary Figure 20** Sample matched fragments between a predicted structure hit and variobactin B. Several matched fragments between the hypothetical compound hit and the corresponding true structure are shown. Fragments of variobactin B were generated using the GNP Fragmenter application. Detected hypothetical spectral fragments are shown as lines in the diagram above, with detected masses shown in red. P-scores for the scan are listed above. Full results tables for this scan and experimental run are available at <http://magarveylab.ca/data/gnp>.

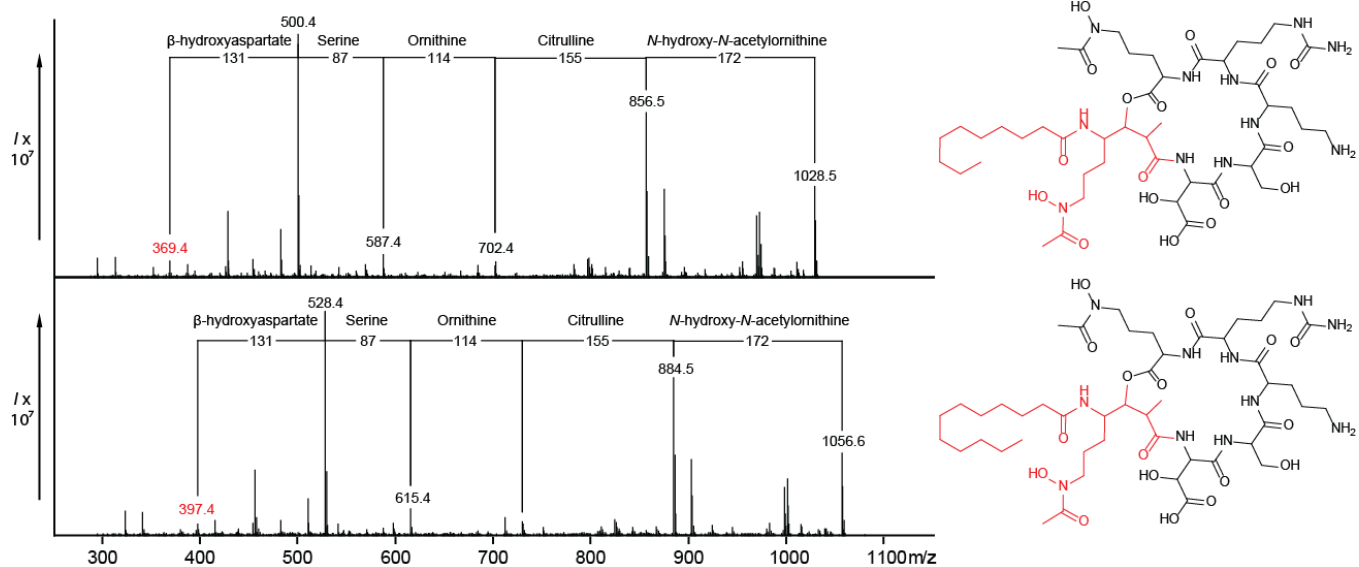

**Supplementary Figure 21** MS/MS comparison of variobactin A and B. LC-MS/MS fragments of variobactin B (*top*) and A (*bottom*) indicate the presented structures, with a 28 Da difference in fragment mass attributed to the addition of two CH<sub>2</sub> units to the acyl tail of variobactin A.



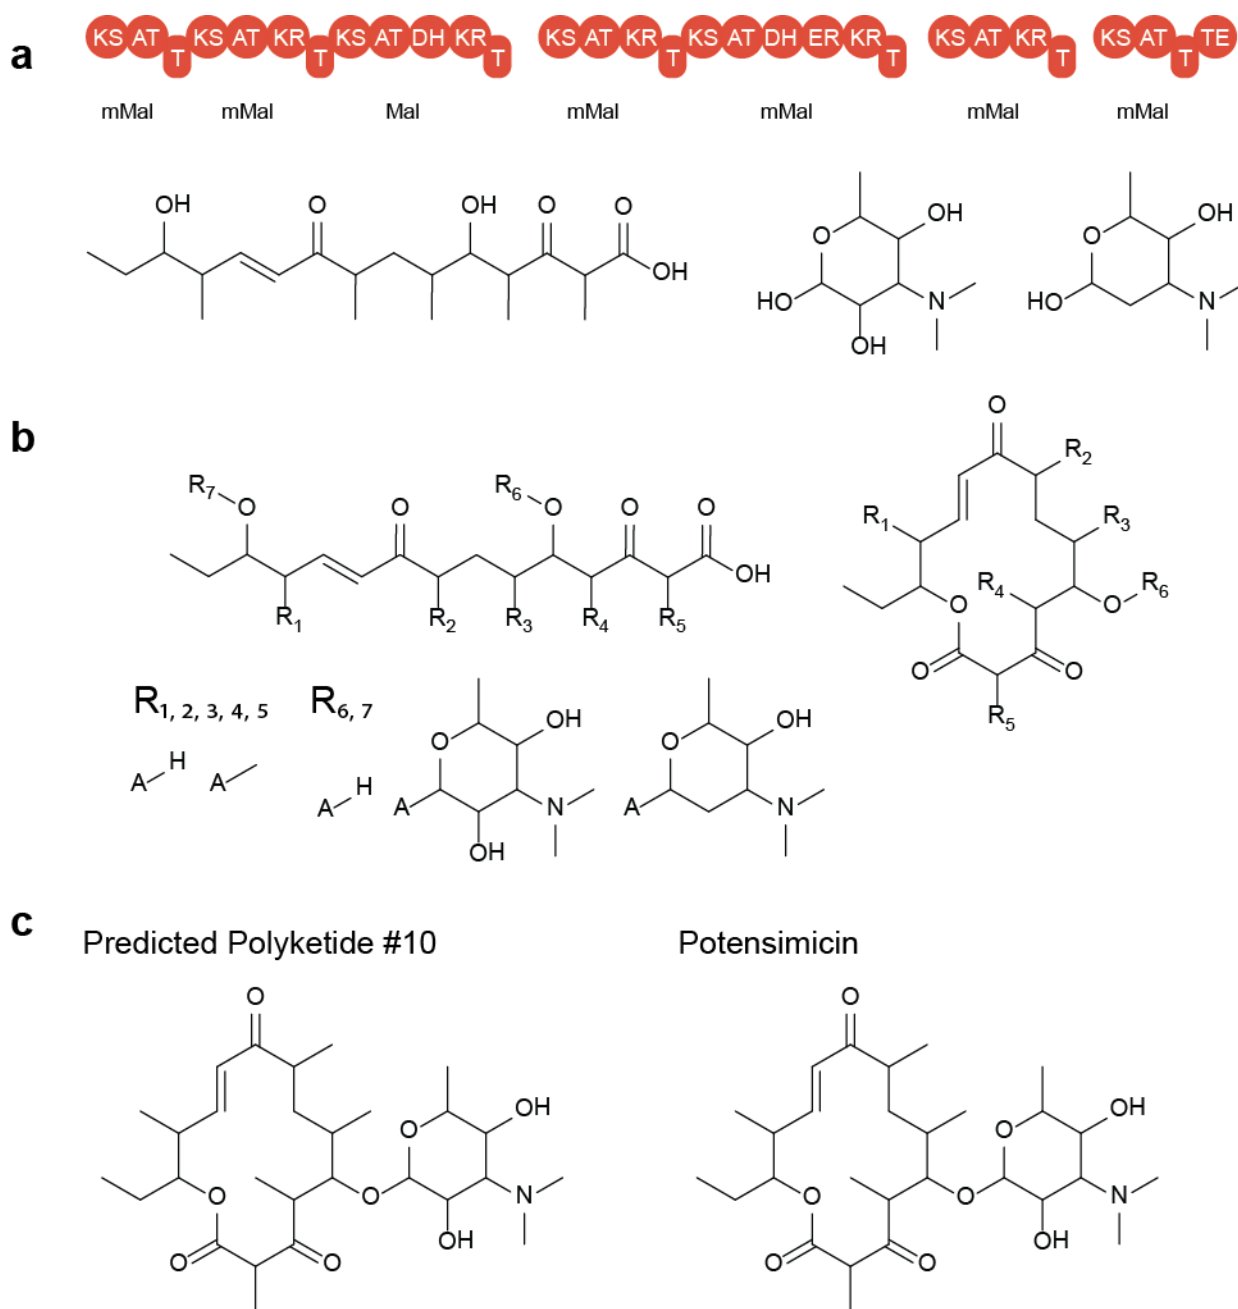

**Supplementary Figure 23** Prediction, combinatorialization, and detection of potensimicin. **(a)** GNP detected PKS biosynthetic gene cluster from *Nocardiosis potens*, with predicted monomers listed and GNP-generated prediction shown. **(b)** Structures used for combinatorialization. **(c)** Structure of the most frequent hit detected within the *N. potens* LC-MS/MS data (*left*), as well as the true associated metabolite, potensimicin (*right*).

**a**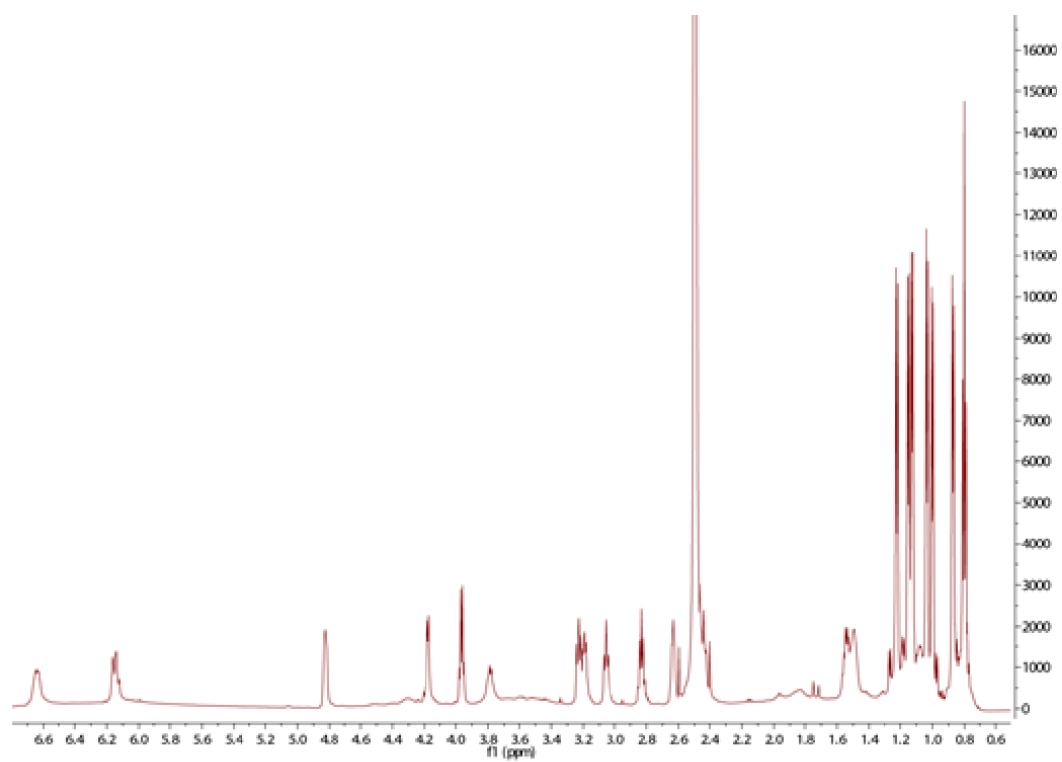**b**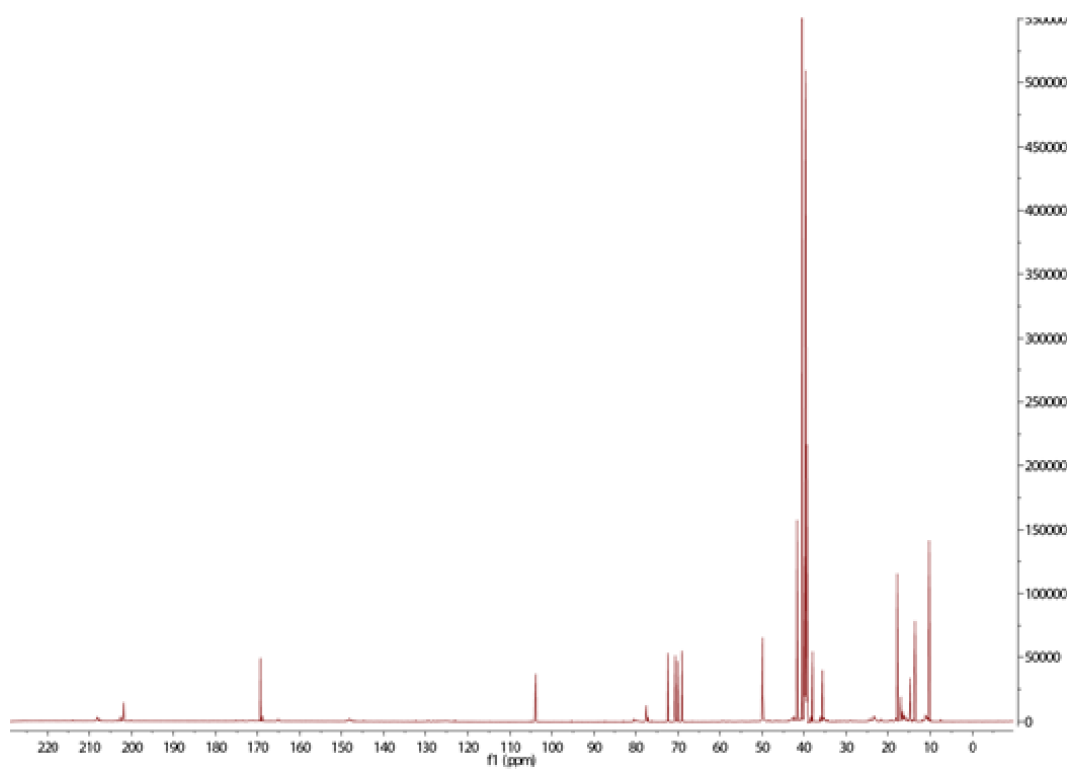

**Supplementary Figure 24** NMR analysis of potensimicin (**7**) in DMSO. **(a)** <sup>1</sup>H NMR spectrum. **(b)** <sup>13</sup>C NMR spectrum.

**a**

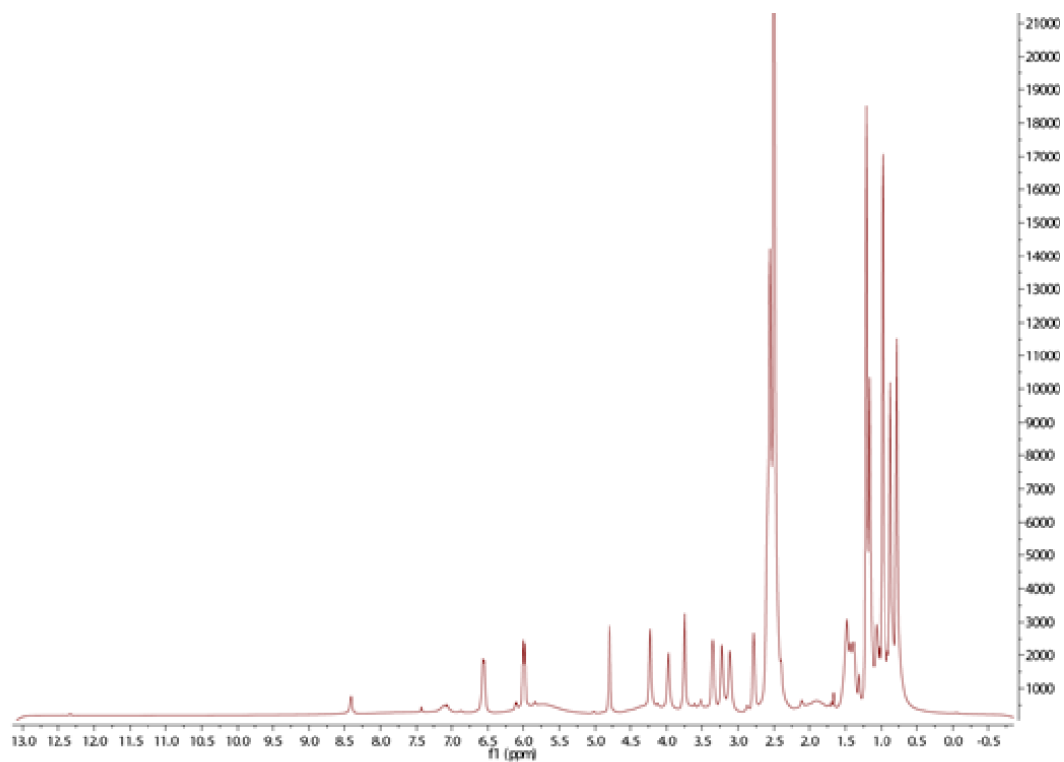

**b**

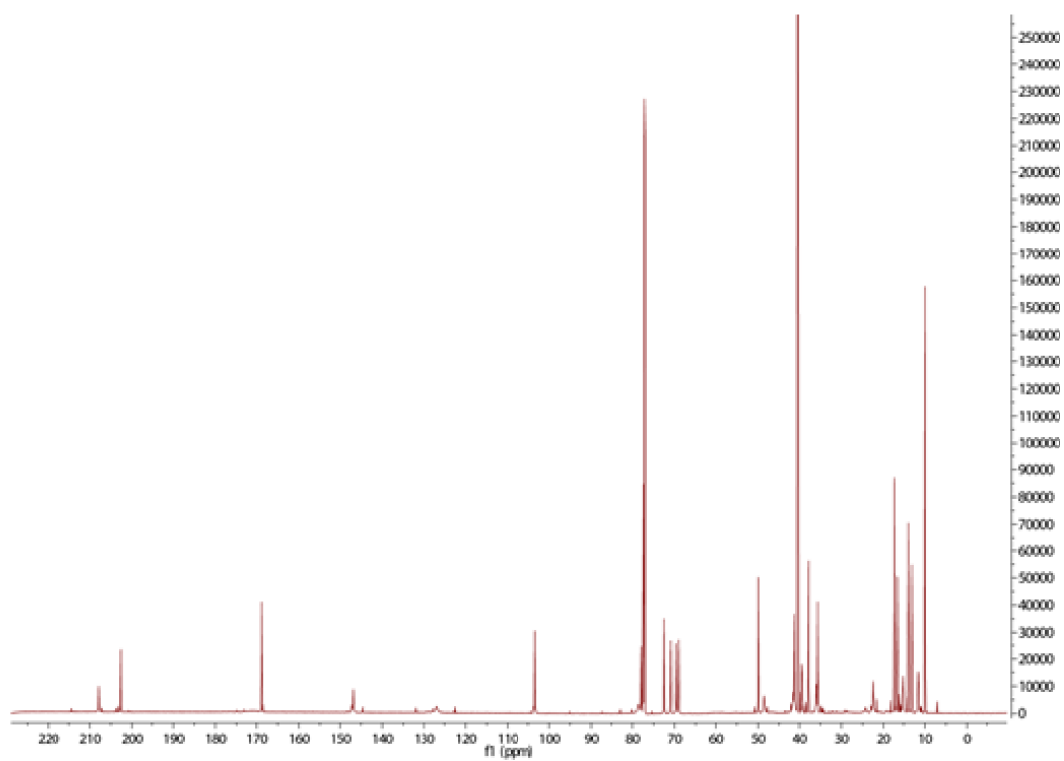



**c**

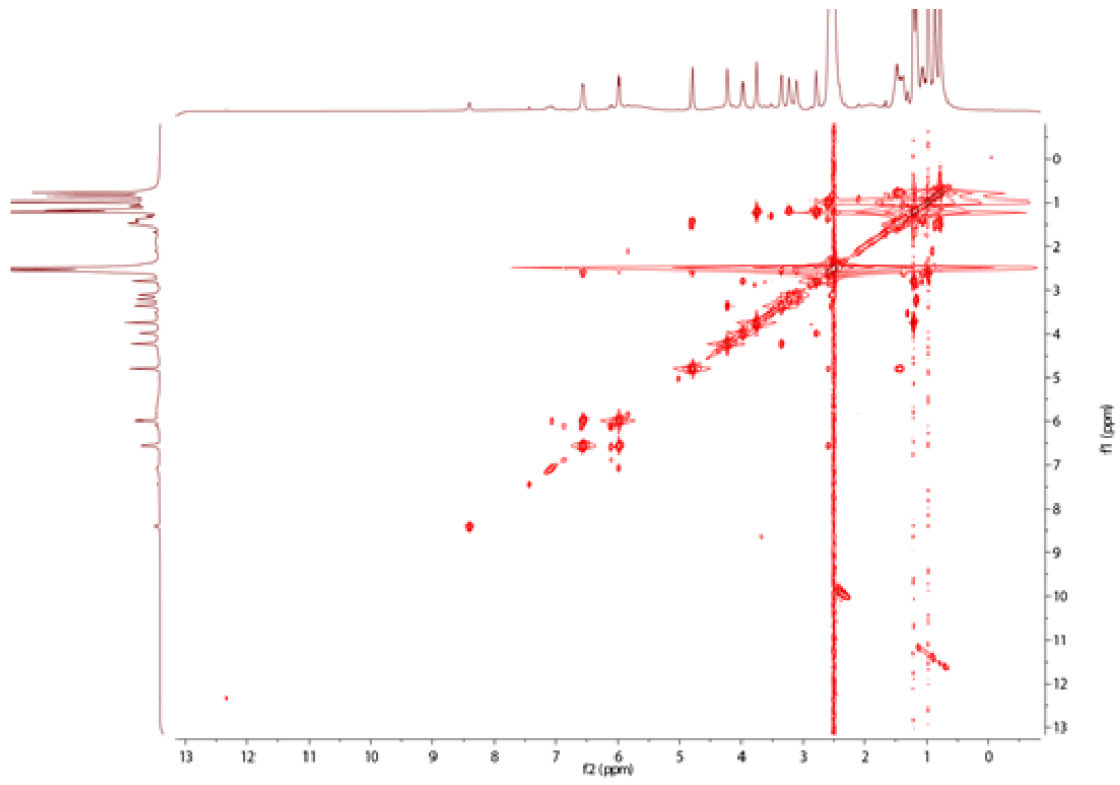

**d**

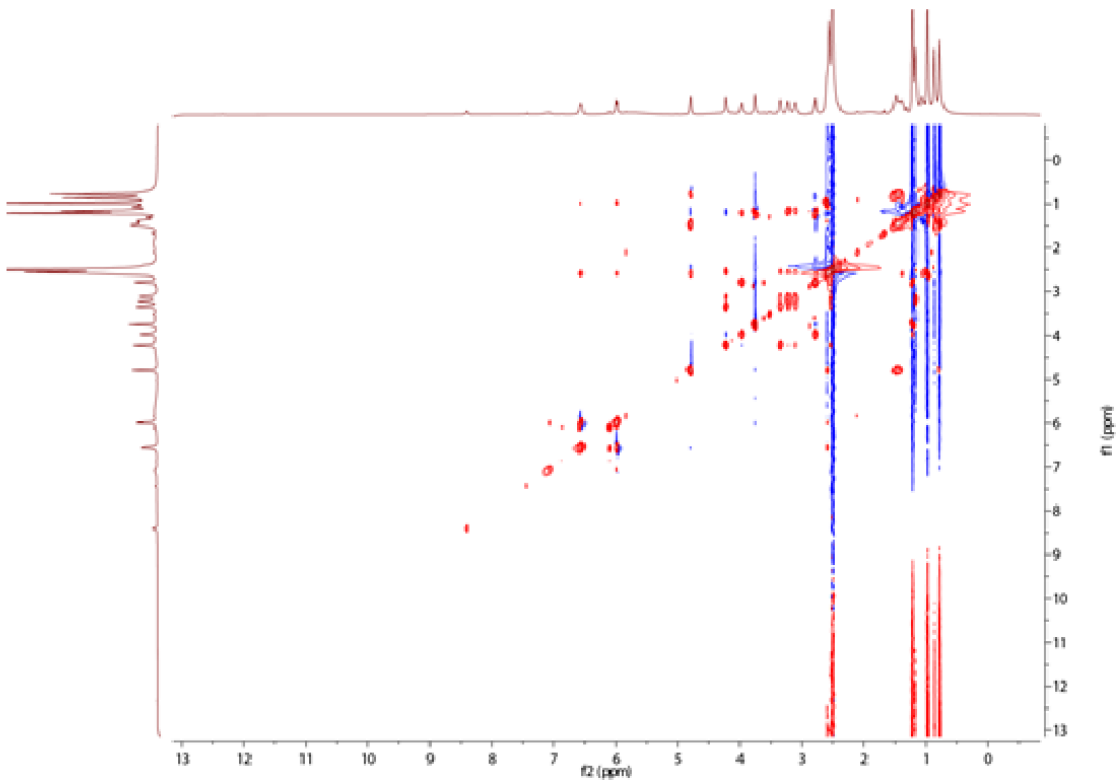

**e**

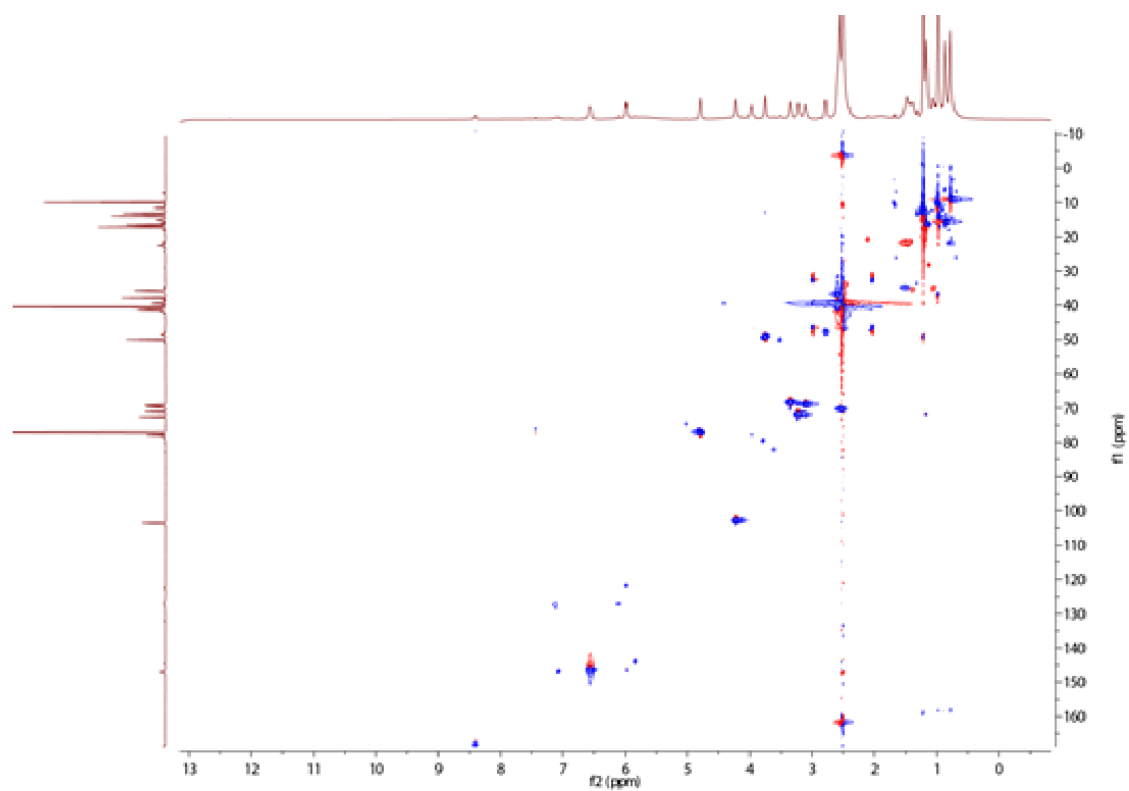

**f**

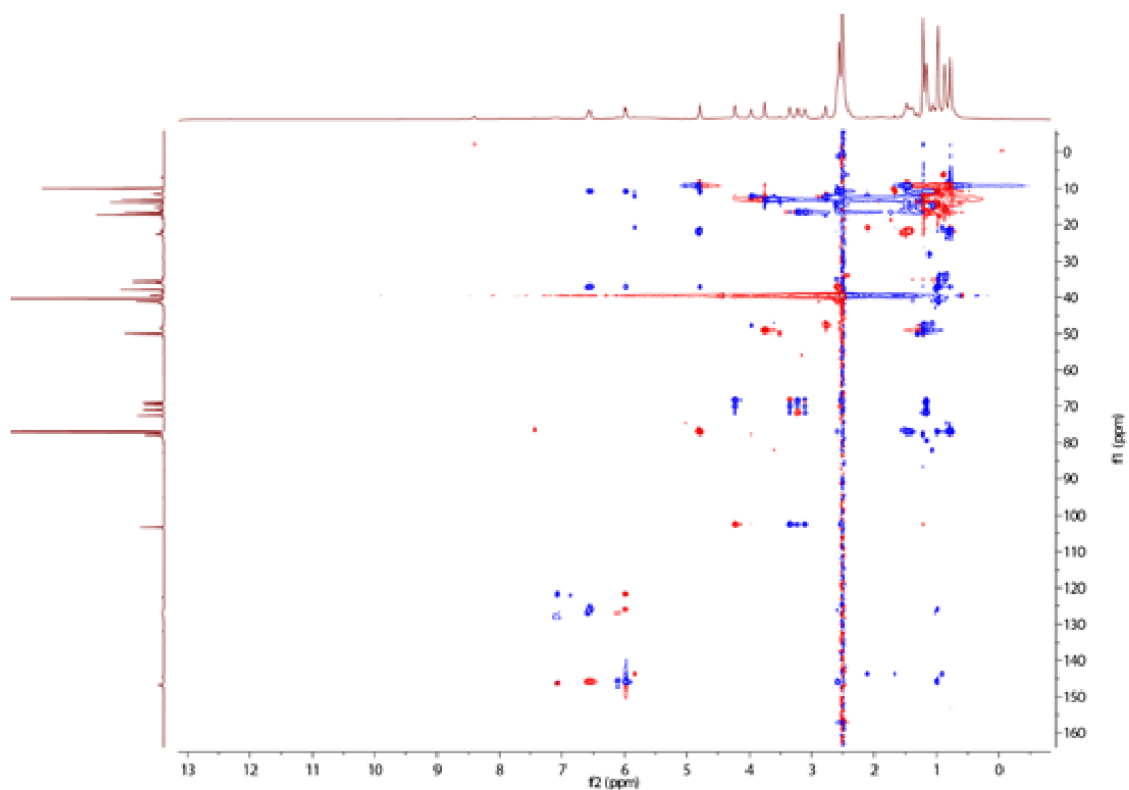

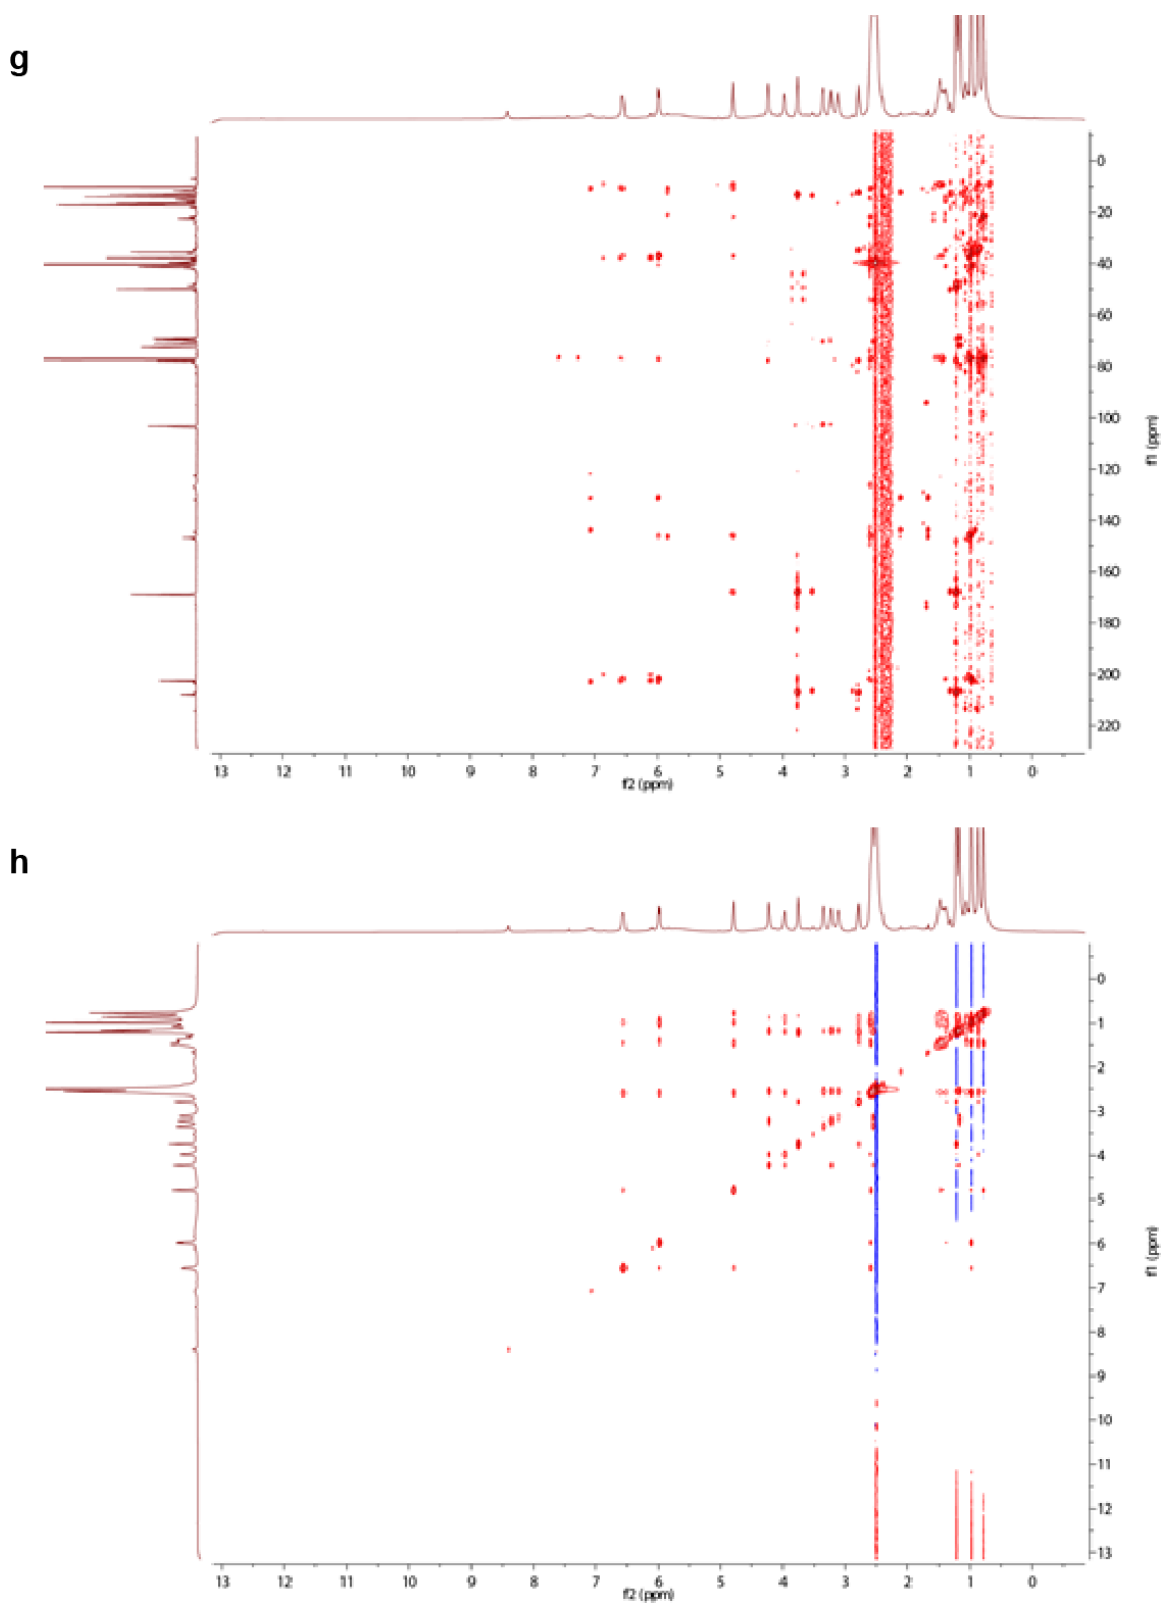

**Supplementary Figure 25** NMR analysis of potensimicin (**7**) in  $\text{CDCl}_3$ . (a)  $^1\text{H}$  NMR spectrum. (b)  $^{13}\text{C}$  NMR spectrum. (c)  $^1\text{H}$ - $^1\text{H}$  COSY spectrum. (d)  $^1\text{H}$ - $^1\text{H}$  TOCSY spectrum. (e)  $^1\text{H}$ - $^{13}\text{C}$  HSQC spectrum. (f)  $^1\text{H}$ - $^{13}\text{C}$  HSQC-TOCSY spectrum. (g)  $^1\text{H}$ - $^{13}\text{C}$  HMBC spectrum. (h)  $^1\text{H}$ - $^1\text{H}$  NOESY spectrum.

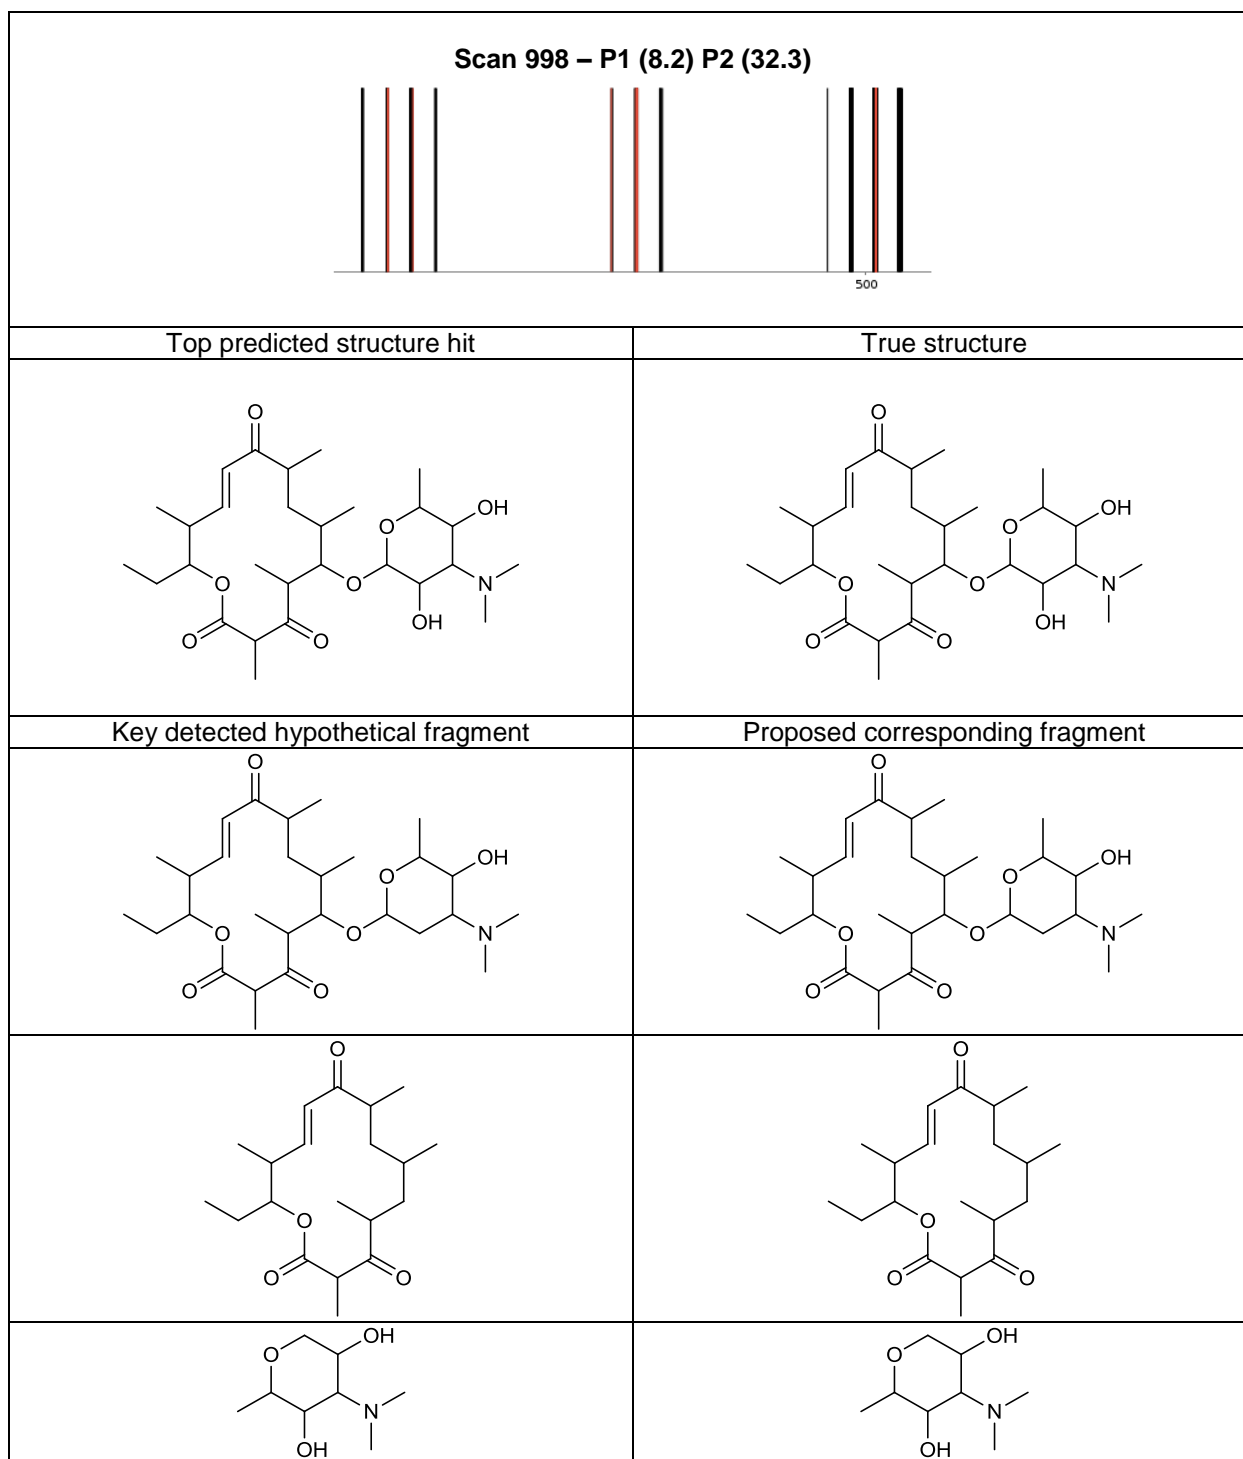

**Supplementary Figure 26** Sample matched fragments between a predicted structure hit and potensimicin. Several matched fragments between the hypothetical compound hit and the corresponding true structure are shown. Fragments of potensimicin were generated using the GNP Fragmenter application. Detected hypothetical spectral fragments are shown as lines in the diagram above, with detected masses shown in red. P-scores for the scan are listed above. Full results tables for this scan and experimental run are available at <http://magarveylab.ca/data/gnp>.

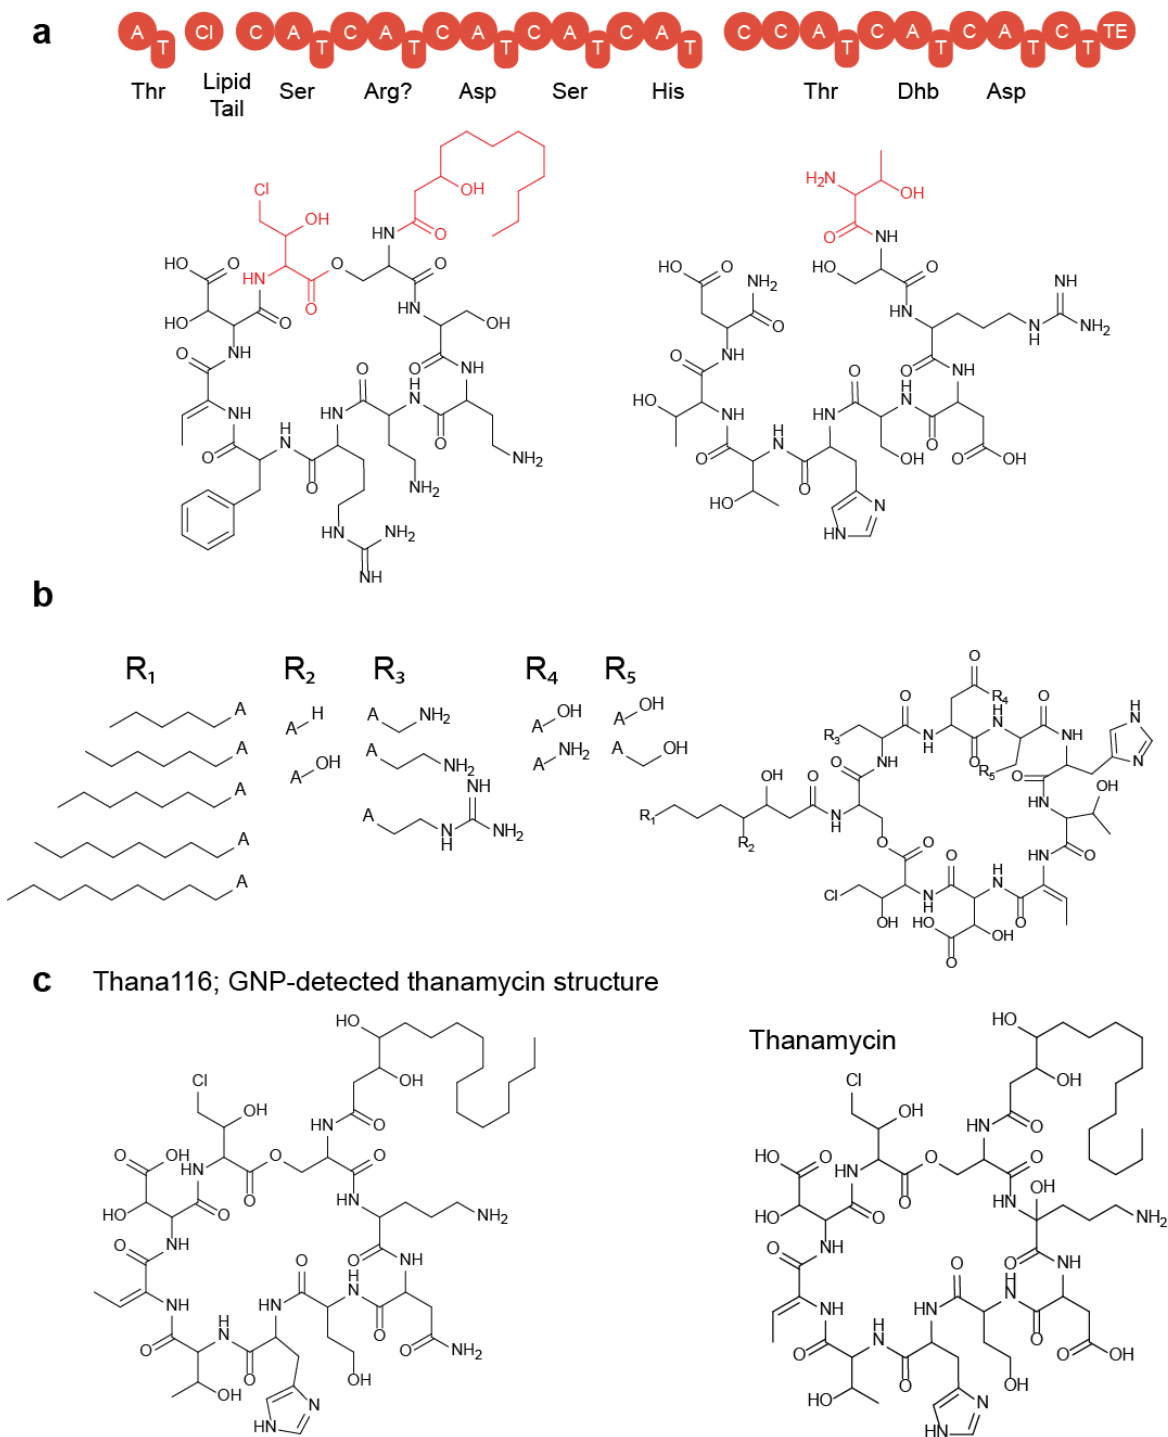

**Supplementary Figure 27** Prediction, combinatorialization, and detection of thanamycin metabolites. (a) GNP detected thanamycin biosynthetic gene cluster from *Pseudomonas fluorescens* DSM 11579 (90% pairwise identity with *Pseudomonas* SH-C52 ThaAB), with predicted monomers listed and GNP-generated prediction shown (right) beside the related syringomycin structure (left). (b) Structures used for combinatorialization, taking into account the initial acylating condensation domain and trans-acting chlorinated threonine adenylation domain, as well as conserved syringomycin-family modifications. (c) Structure of the most frequent hit detected within the *P. fluorescens* DSM 11579 LC-MS/MS data.

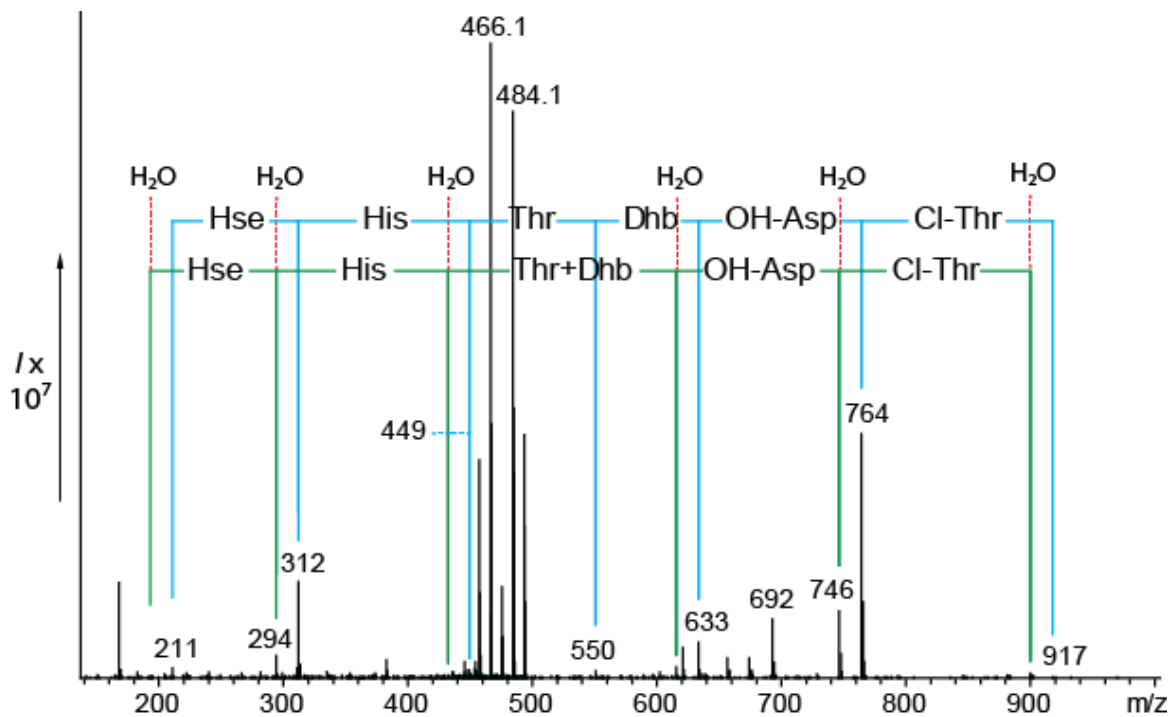

**Supplementary Figure 28** Thanamycin tandem MS. MS/MS of the deacylated and dehydrated 1004  $[M+H]^+$  thanamycin fragment with amino acid annotation.

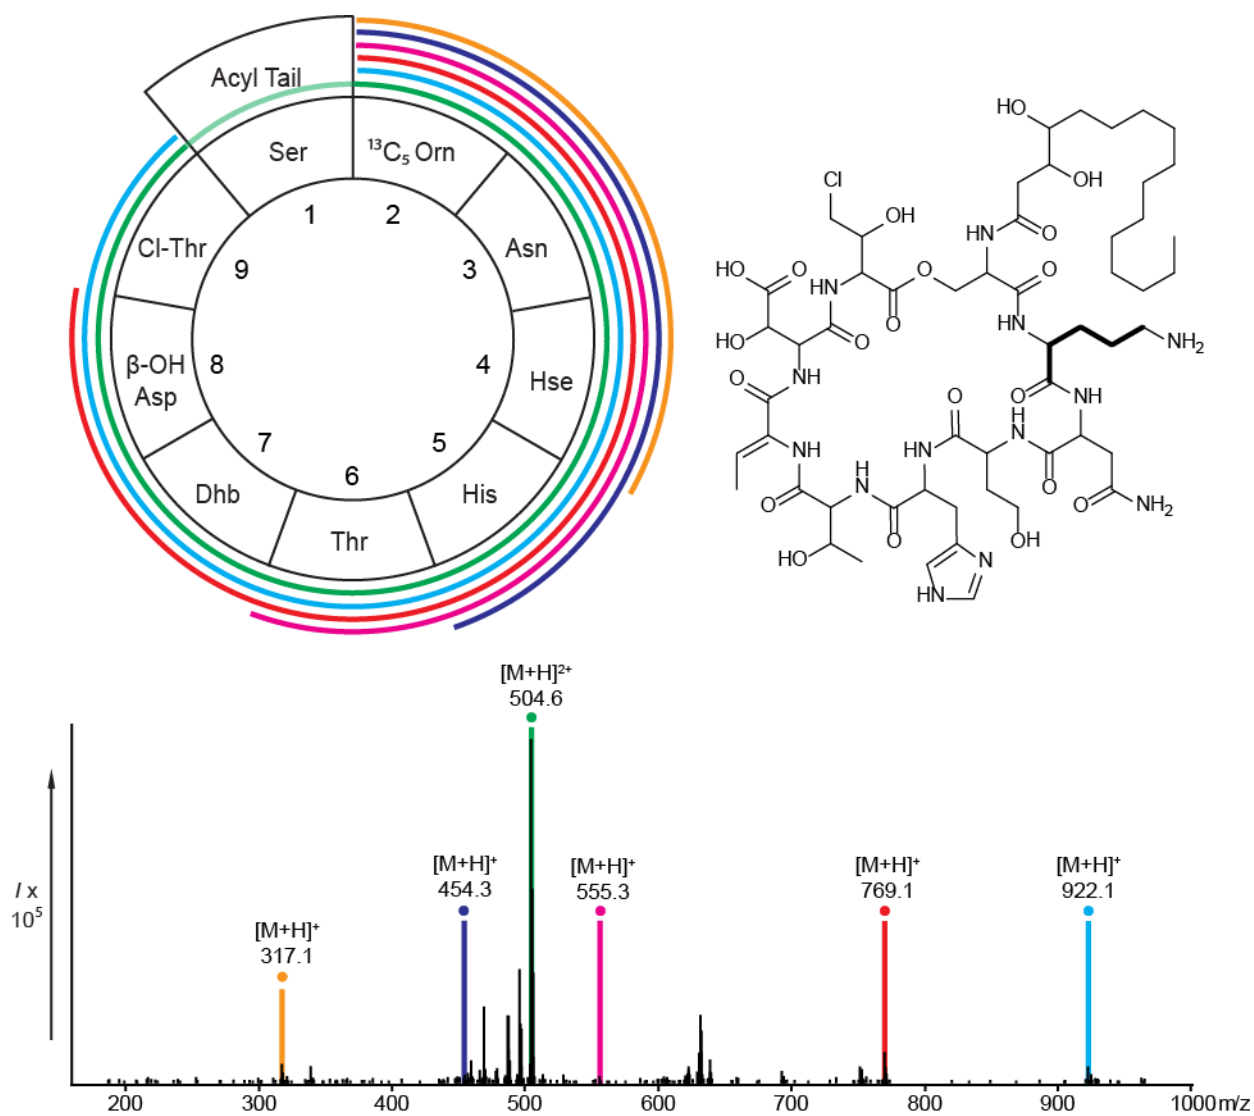

**Supplementary Figure 29** GNP analysis of  $^{13}\text{C}_5$ -ornithine incorporation indicates ornithine at position 2. GNP analysis of extracted cultures containing stable  $^{13}\text{C}_5$ -ornithine identified matched fragments corresponding thanamycin with heavy ornithine at position 2 (*top left, bottom*), resulting in the matched structure (*top right*). MS/MS spectra and matched fragments are from representative scan 913.

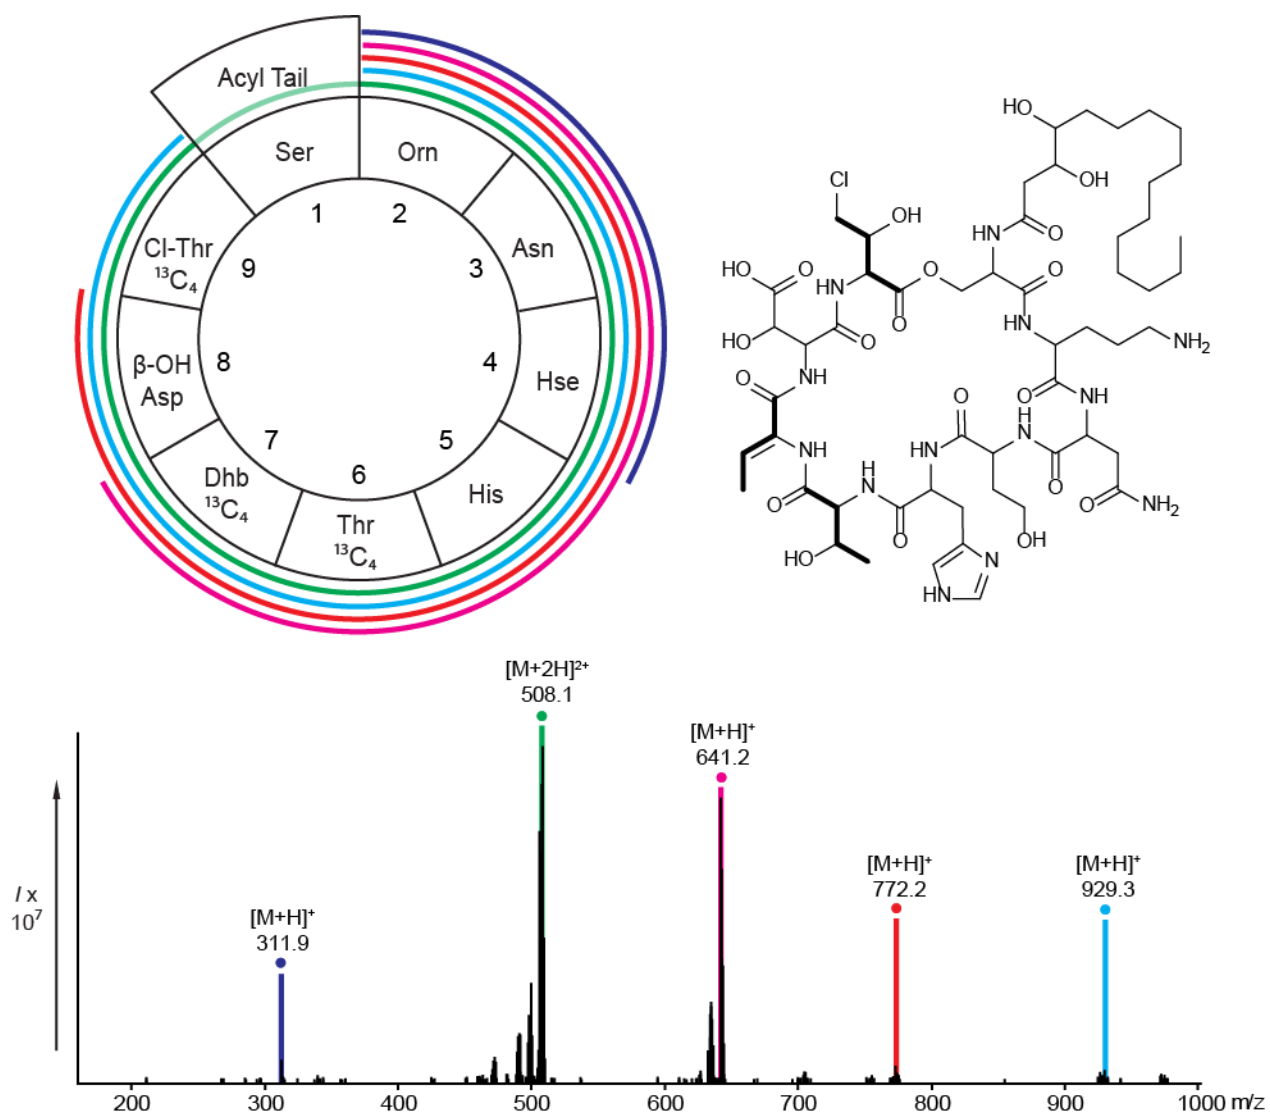

**Supplementary Figure 30** GNP analysis of  $^{13}\text{C}_4$ -threonine incorporation indicates homoserine at position 4. GNP analysis of extracted cultures containing stable  $^{13}\text{C}_4$ -threonine identified matched fragments corresponding thanamycin with heavy threonine or threonine derivatives (Dhb) at positions 6, 7, and 9 (*top left, bottom*). No fragments were detected that indicated incorporation at position 4, resulting in the matched structure with homoserine found at position 4 (*top right*). MS/MS spectra and matched fragments are from representative scan 1148.



**a**

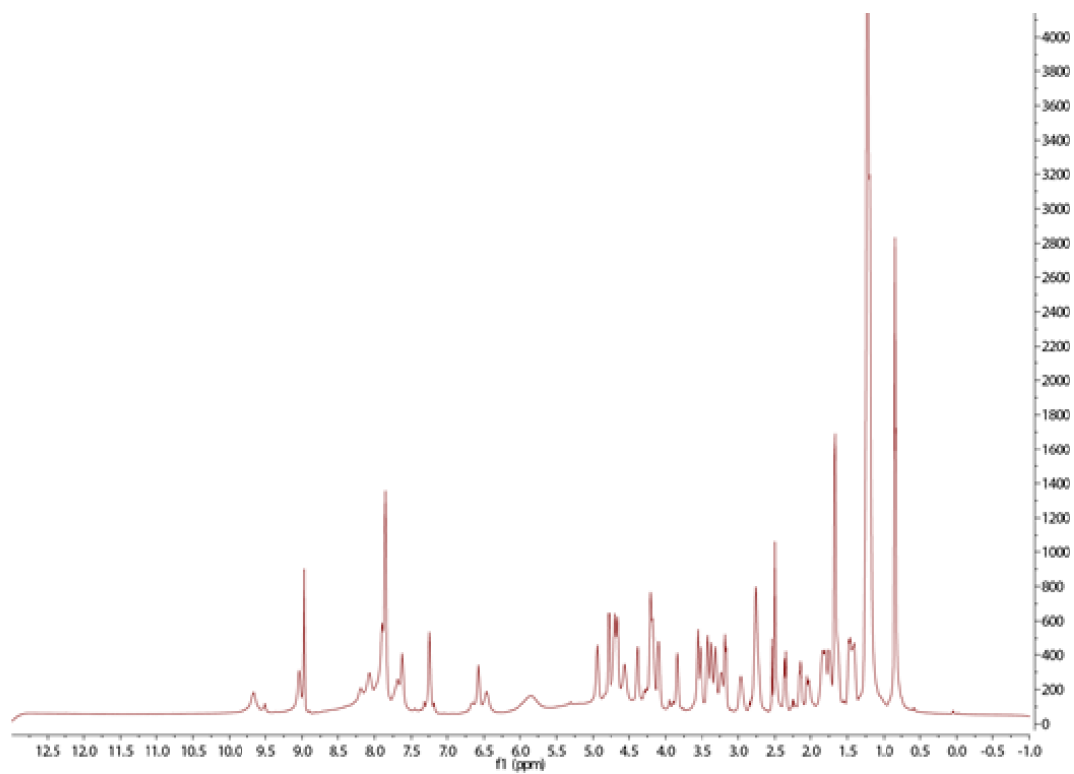

**b**

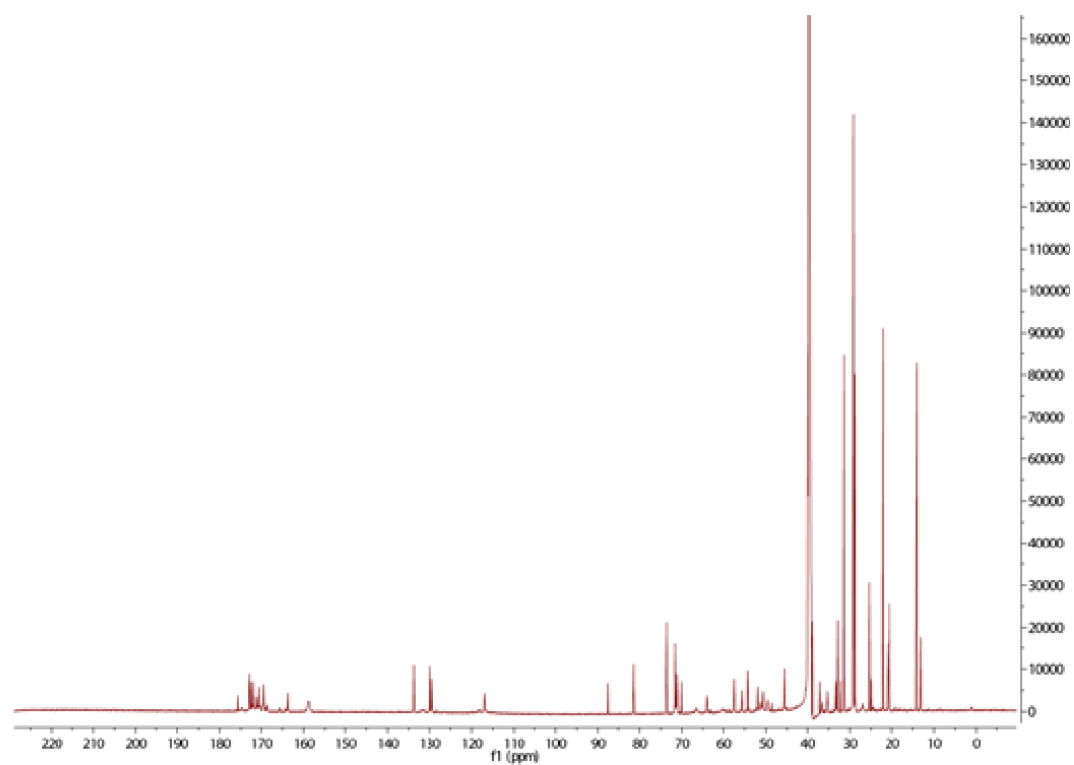

**c**

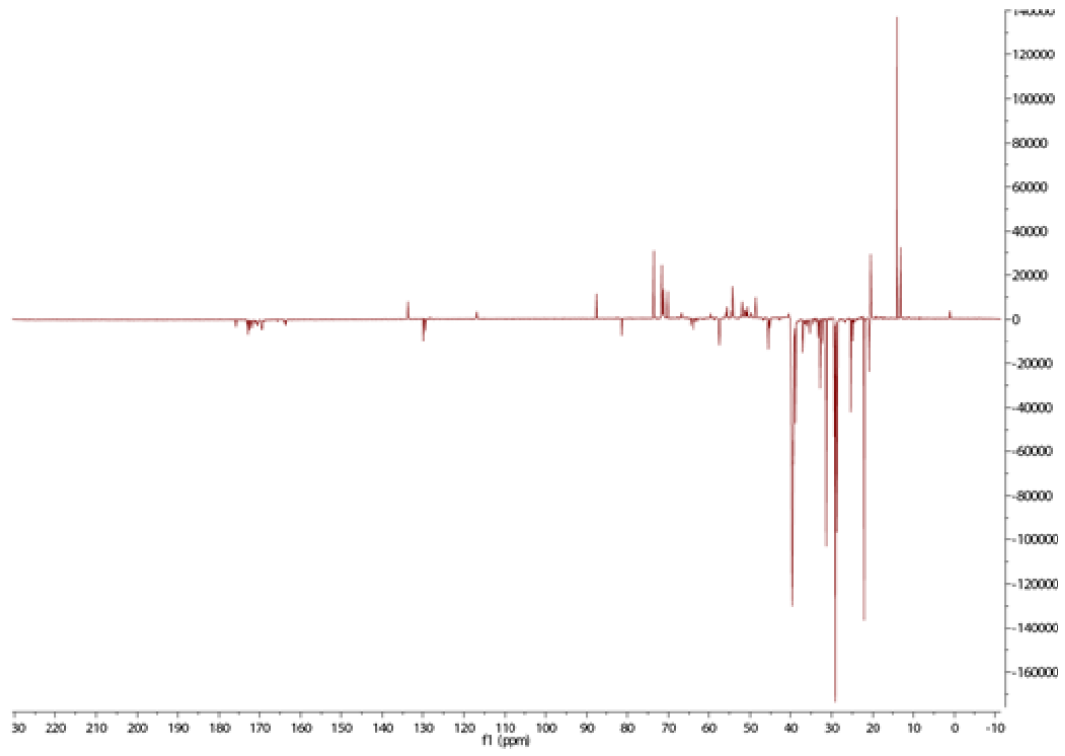

**d**

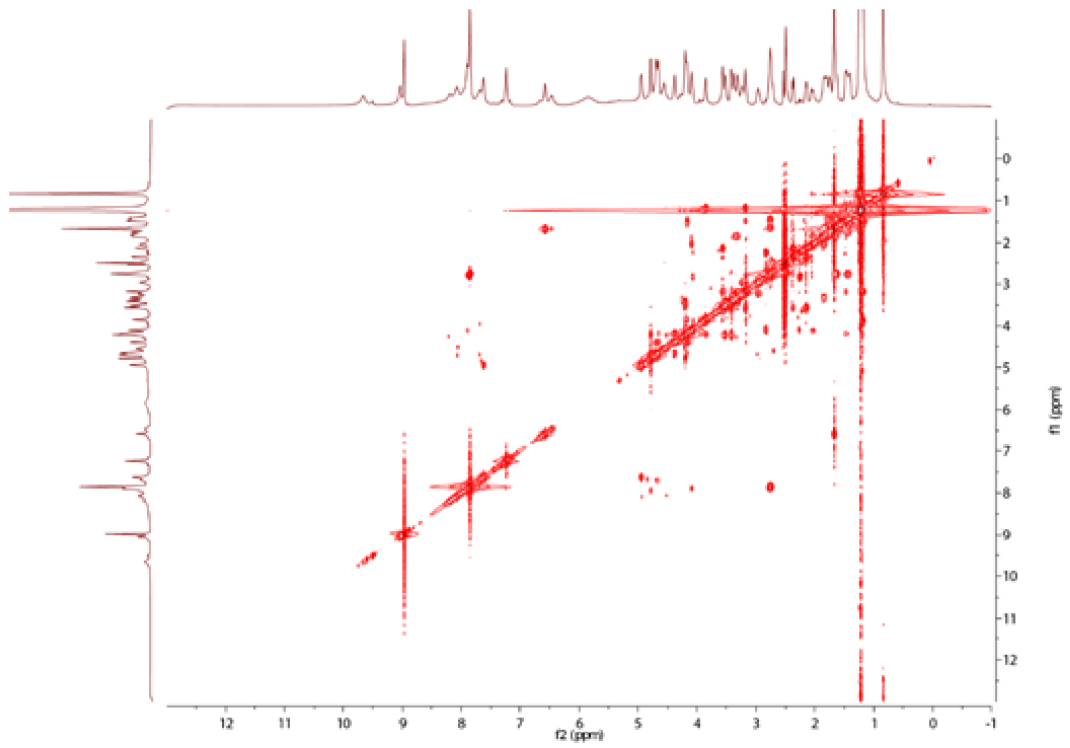

e

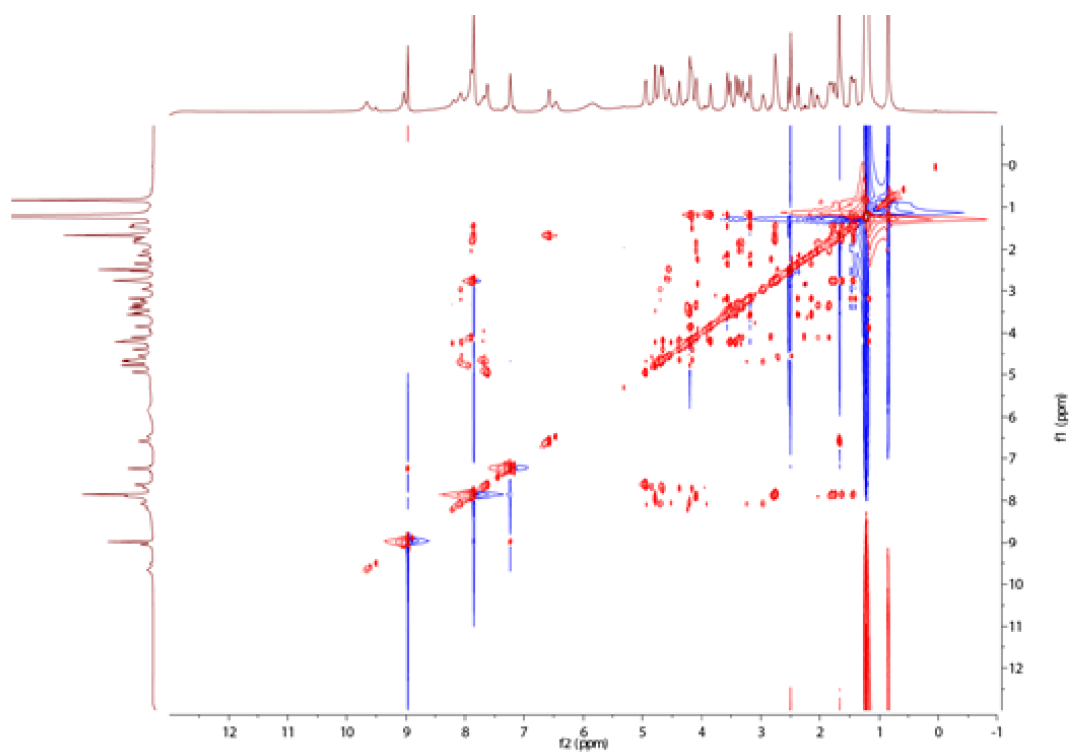

f

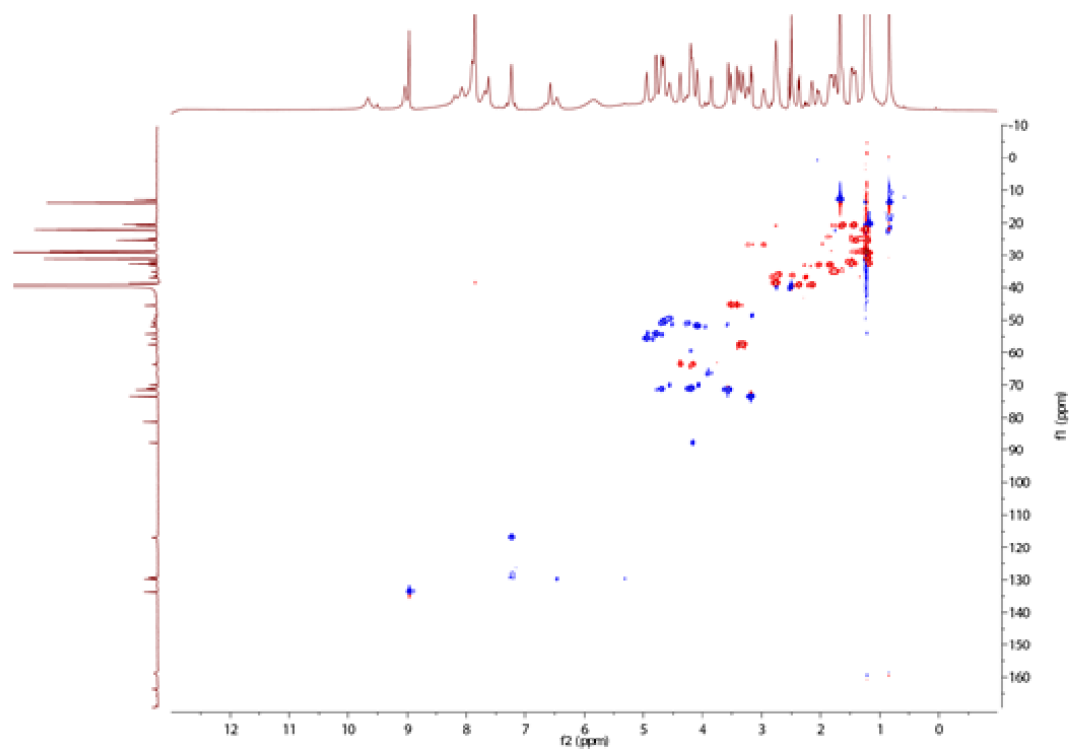

**g**

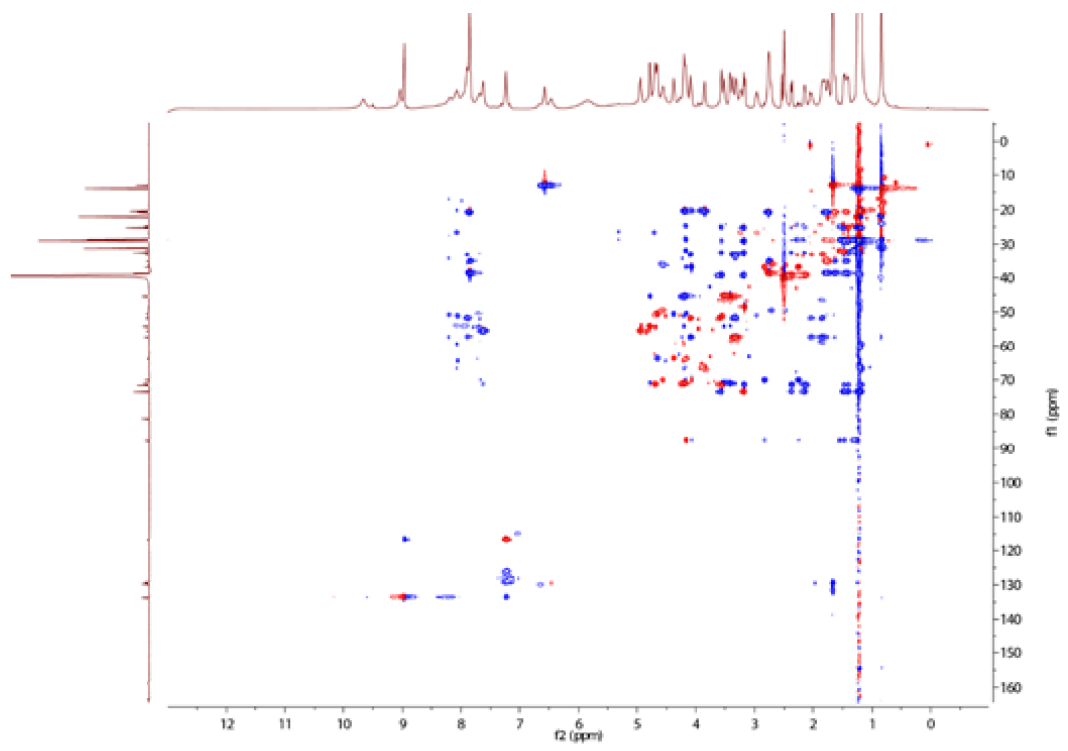

**h**

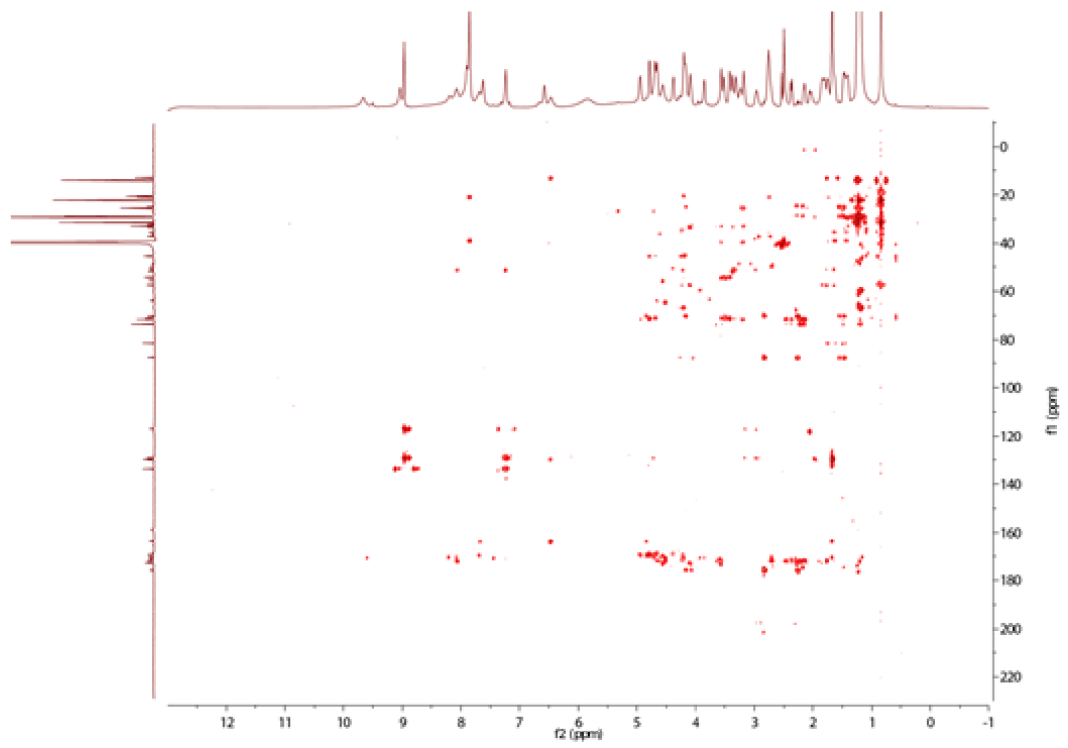

i

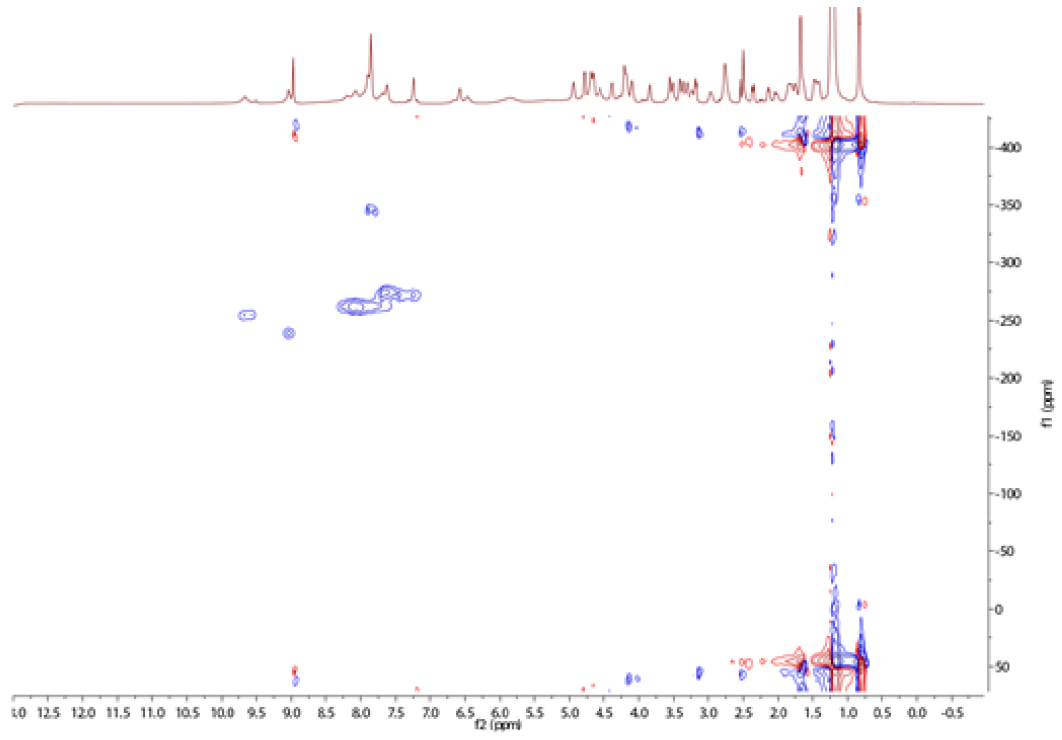

j

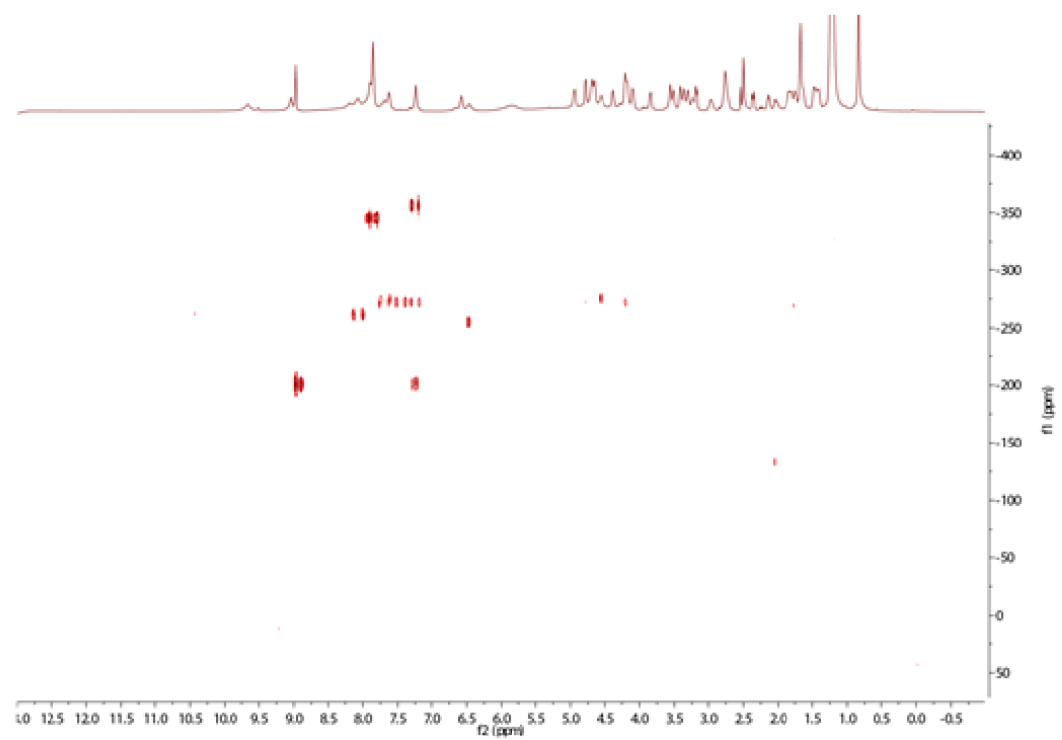

**k**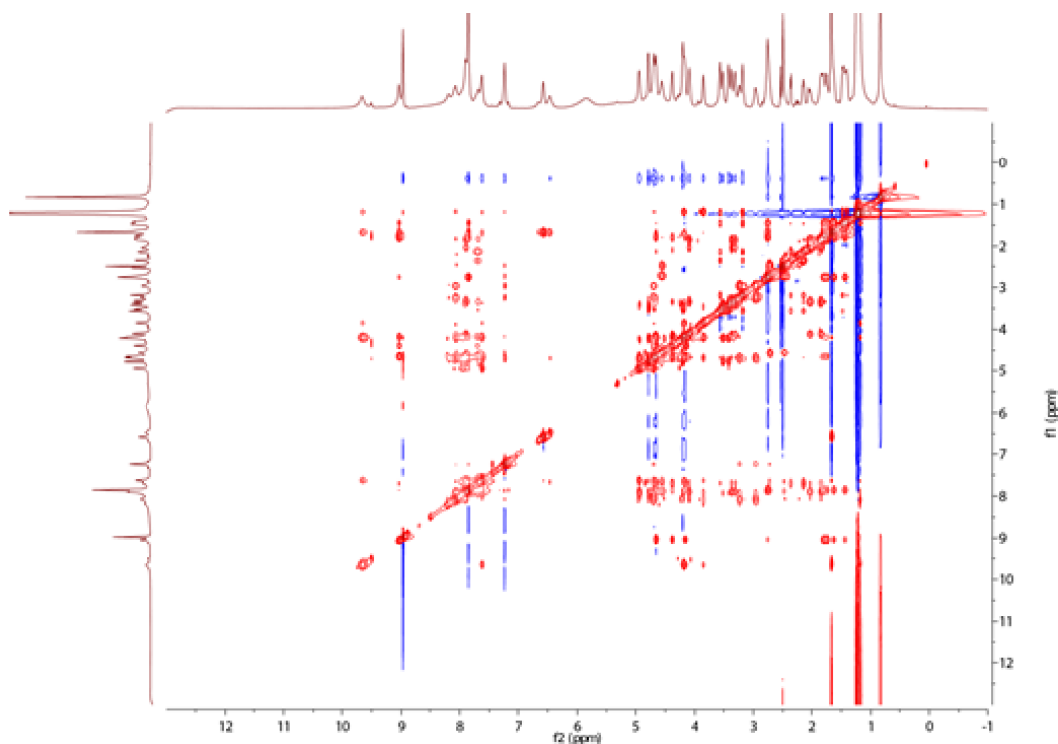

**Supplementary Figure 31** NMR analysis of thanamycin (**8**) in DMSO. (a)  $^1\text{H}$  NMR spectrum. (b)  $^{13}\text{C}$  NMR spectrum. (c)  $^{13}\text{C}$  DEPTq spectrum. (d)  $^1\text{H}$ - $^1\text{H}$  COSY spectrum. (e)  $^1\text{H}$ - $^1\text{H}$  TOCSY spectrum. (f)  $^1\text{H}$ - $^{13}\text{C}$  HSQC spectrum. (g)  $^1\text{H}$ - $^{13}\text{C}$  HSQC-TOCSY spectrum. (h)  $^1\text{H}$ - $^{13}\text{C}$  HMBC spectrum. (i)  $^1\text{H}$ - $^{15}\text{N}$  HSQC spectrum. (j)  $^1\text{H}$ - $^{15}\text{N}$  HMBC spectrum. (k)  $^1\text{H}$ - $^1\text{H}$  NOESY spectrum.

Scan 1487 – P1 (17.3) P2 (20.0)

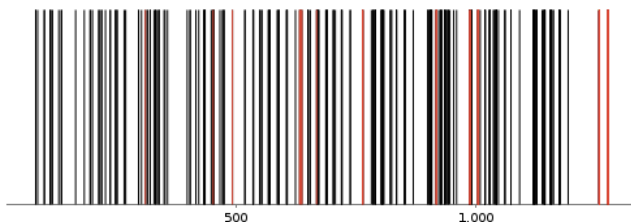

| Top predicted structure hit        | True structure                  |
|------------------------------------|---------------------------------|
|                                    |                                 |
| Key detected hypothetical fragment | Proposed corresponding fragment |
|                                    |                                 |
|                                    |                                 |
|                                    |                                 |
|                                    |                                 |

**Supplementary Figure 32** Sample matched fragments between a predicted structure hit and thanamycin. Several matched fragments between the hypothetical compound hit and the corresponding true structure are shown. Fragments of thanamycin were generated using the GNP Fragmenter application. Detected hypothetical spectral fragments are shown as lines in the diagram above, with detected masses shown in red. P-scores for the scan are listed above. Full results tables for this scan and experimental run are available at <http://magarveylab.ca/data/gnp>.

| Source     | Program         | Natural Product Classes        | Automated NRP structure prediction? | Automated RiPP structure prediction? | Automated sugar structure prediction? | Automated polyketide structure prediction? | Automated MS analysis? | Statistical genome - metabolome matching? | Single software package? | User-friendly interface? |
|------------|-----------------|--------------------------------|-------------------------------------|--------------------------------------|---------------------------------------|--------------------------------------------|------------------------|-------------------------------------------|--------------------------|--------------------------|
| This paper | GNP             | Glycosylated Polyketides, NRPs | Yes                                 | No                                   | Yes                                   | Yes                                        | Yes                    | Yes                                       | Yes                      | Yes                      |
| 55         | NRPQuest        | NRPs                           | Yes                                 | No                                   | No                                    | No                                         | Yes                    | Yes                                       | Yes                      | No                       |
| 54         | RiPPQuest       | RiPPs                          | No                                  | Yes                                  | No                                    | No                                         | Yes                    | Yes                                       | Yes                      | No                       |
| 20         | Pep2Path        | NRPs, RiPPs                    | No                                  | No                                   | No                                    | No                                         | No                     | Yes                                       | No                       | No                       |
| 21         | Peptidogenomics | NRPs, RiPPs                    | No                                  | No                                   | No                                    | No                                         | No                     | No                                        | No                       | No                       |
| 22         | Glycogenomics   | Glycosylated NPs               | No                                  | No                                   | No                                    | No                                         | No                     | No                                        | No                       | No                       |
| 57         | HSEE            | RiPPs                          | No                                  | No                                   | No                                    | No                                         | No                     | Yes                                       | No                       | No                       |

**Supplementary Figure 33** Comparison of GNP to several manual, automated, or semi-automated genomic and metabolomic natural products discovery methods. GNP expands the chemical search space of previously published methods by targeting a wider spectrum of natural product classes, and automates structure prediction for modular natural products. While previously published methods require the annotation of mass shifts within a tandem mass spectrum scan<sup>20-22</sup>, or the selection of a single point on a high-resolution mass spectrum<sup>57</sup>, GNP's integrated mass spectral analysis algorithms eliminate the need for manual mass spectrum annotation and therefore facilitates high-throughput discovery. Finally, as a continuous workflow integrated into a single web application with a user-friendly interface, GNP is accessible to natural products chemists without formal bioinformatics training. By automating the most labour-intensive steps associated with a combined genomic and metabolomic discovery approach, GNP has the potential to significantly accelerate natural product discovery. NRP, nonribosomal peptide; RiPP, ribosomally synthesized and post-translationally modified peptide; NP, natural product.



## **Supplementary Tables**

| <b>Gene name</b> | <b>Predicted Function</b>           | <b>Strand</b> | <b>Amino Acids</b> |
|------------------|-------------------------------------|---------------|--------------------|
| cal1             | Aminotransferase                    | -             | 414                |
| cal2             | LuxR transcriptional regulator      | -             | 215                |
| cal3             | LysR transcription factor           | -             | 80                 |
| cal4             | MbtH domain protein                 | -             | 73                 |
| cal5             | Thioesterase                        | -             | 263                |
| cal6             | Hypothetical protein                | +             | 319                |
| cal7             | 3-oxoacyl-ACP synthase              | +             | 335                |
| cal8             | 3-oxoacyl-ACP synthase              | +             | 414                |
| cal9             | Acyl-carrier protein                | -             | 84                 |
| cal10            | Hypothetical protein                | -             | 124                |
| cal11            | Hypothetical protein                | -             | 137                |
| cal12            | Translation initiation factor IF-2  | -             | 141                |
| cal13            | 3-hydroxylacyl-ACP dehydratase      | -             | 315                |
| cal14            | Hypothetical protein                | +             | 258                |
| cal15            | Ferredoxin                          | +             | 66                 |
| cal16            | Cytochrome P450                     | +             | 408                |
| cal17            | NRPS                                | -             | 2568               |
| cal18            | NRPS                                | -             | 2577               |
| cal19            | NRPS                                | -             | 1892               |
| cal20            | Thioesterase                        | -             | 234                |
| cal21            | Short chain dehydrogenase/reductase | -             | 276                |
| cal22            | Adenylation-ACP didomain            | -             | 979                |
| cal23            | Adenylation-ACP didomain            | -             | 600                |
| cal24            | Oxidoreductase                      | -             | 400                |
| cal25            | Hydrolase                           | -             | 275                |
| cal26            | Putative thioesterase               | -             | 334                |
| cal27            | Isomerase                           | -             | 242                |
| cal28            | Phytoene dehydrogenase              | -             | 575                |
| cal29            | Acyl-carrier protein                | -             | 87                 |
| cal30            | 3-oxoacyl-ACP synthase              | -             | 417                |
| cal31            | 3-oxoacyl-ACP synthase              | -             | 380                |
| cal32            | 3-oxoacyl-ACP synthase              | -             | 315                |
| cal33            | 3-oxoacyl-ACP synthase              | -             | 372                |
| cal34            | Acyl-carrier protein                | -             | 88                 |
| cal35            | 3-oxoacyl-ACP dehydratase           | -             | 134                |
| cal36            | 3-oxoacyl-ACP dehydratase           | -             | 160                |
| cal37            | 3-oxoacyl-ACP reductase             | -             | 249                |
| cal38            | YbaK/prolyl-tRNA synthetase         | -             | 179                |
| cal39            | ABC transporter ATPase              | -             | 319                |
| cal40            | Multidrug ABC transporter permease  | -             | 281                |

**Supplementary Table 1** WS9326 gene cluster analysis

**Supplementary Table 2** Summary of  $^1\text{H}$  (600 MHz) and  $^{13}\text{C}$  (125 MHz) spectroscopic data for WS9326a (1) in DMSO- $d_6^a$

|                 | Position | $d_{\text{H}}$ (J in Hz) | $d_{\text{C}}$ | Position           | $d_{\text{H}}$ (J in Hz) | $d_{\text{C}}$          |         |
|-----------------|----------|--------------------------|----------------|--------------------|--------------------------|-------------------------|---------|
| Acyl            | 1 (C=O)  |                          | 165.2, s       | $^4\text{Phe}$ NH  | 9.16, 1H, d (7.7)        |                         |         |
|                 | 2        | 6.68, 1H, d (15.6)       | 122.7, d       | a                  | 4.33 m                   | 55.7, d                 |         |
|                 | 3        | 7.42, 1H, d (15.6)       | 137.4, d       | b                  | 3.28, 1H, m              | 36.3, t                 |         |
|                 | 4        |                          | 133.1, s       | b'                 | 2.73, 1H, o. t (12.9)    |                         |         |
|                 | 5        | 7.53, 1H, d (7.6)        | 126.0, d       | 1                  |                          | 138.7, s                |         |
|                 | 6        | 7.32, 1H, o. m           | 127.3, d       | 2,6                | 7.32, 2H, o. d (8.4)     | 128.9, d (o)            |         |
|                 | 7        | 7.36, 1H, o. t (7.6)     | 128.9, d (o)   | 3,5                | 7.27, 2H, o. t, (7.6)    | 127.9, d (o)            |         |
|                 | 8        | 7.20, 1H, o. m           | 129.6, d       | 4                  | 7.27, 1H, o. m           | 127.9, d (o)            |         |
|                 | 9        |                          | 137.0, s       | C=O                |                          | 170.1, s                |         |
|                 | 10       | 6.50, 1H, d (11.2)       | 126.8, d       | $^5\text{Thr}$     | NH                       | 7.59, 1H, d (9.5)       |         |
|                 | 11       | 5.83, 1H, dt (11.7, 7.4) | 134.0, d       |                    | a                        | 4.36, 1H, =tho. t (9.8) | 57.2, d |
|                 | 12       | 1.99, 2H, m              | 29.9, t        |                    | b                        | 4.26, 1H, m             | 68.1, d |
|                 | 13       | 1.36, 2H, m (7.8)        | 21.9, t        |                    | g                        | 0.64, 3H, o. d (6.4)    | 22.0, q |
|                 | 14       | 0.79, 3H, t (7.4)        | 13.53, q       |                    | OH                       | 5.18, 1H, d (2.9)       |         |
| $^1\text{Thr}$  | NH       | 8.70, 1H, d (9.3)        |                | C=O                |                          | 169.9, s                |         |
|                 | a        | 5.33, 1H, t (9.6)        | 53.2, d        | $^6\text{Asn}$     | NH                       | 8.33, 1H, d (7.3)       |         |
|                 | b        | 5.03, 1H, dq (9.8, 6.2)  | 73.24, d       |                    | a                        | 4.44, 1H, m             | 50.8, d |
|                 | g        | 1.15, 3H, d, 6.0         | 16.56, q       |                    | b                        | 2.46, 1H, m             | 36.7, t |
| C=O             |          | 169.0, s                 | b'             |                    | 2.41, 1H, dd (15.3, 9.9) |                         |         |
| $^2\text{DTyr}$ | NMe      | 2.98, 3H, s              | 34.2, q        | g C=O              |                          | 171.2, s                |         |
|                 | a        |                          | 128.5, s       | g NH <sub>2</sub>  | 6.93, 1H, s              |                         |         |
|                 | b        | 6.13, 1H, s              | 131.6, d       | g' NH <sub>2</sub> | 7.30, 1H, o              |                         |         |
|                 | 1        |                          | 122.9, s       | C=O                |                          | 171.6, s                |         |
|                 | 2,6      | 7.39, 2H, d (8.6)        | 131.5, d       | $^7\text{Ser}$     | NH                       | 8.48, 1H, d (9.6)       |         |
|                 | 3,5      | 6.59, 2H, d (8.6)        | 114.8, d       |                    | a                        | 4.33, 1H, o             | 56.0, d |
|                 | 4        |                          | 158.1, s       |                    | b                        | 3.26, 1H, o             | 60.8, d |
| C=O             |          | 165.6, s                 | b'             |                    | 3.16, 1H, br. t (~9)     |                         |         |
| $^3\text{Leu}$  | NH       | 9.23, 1H, br. s          |                | OH                 | 4.78, 1H, br             |                         |         |
|                 | a        | 4.07, 1H, m              | 53.7, d        | C=O                |                          | 168.8, s                |         |
|                 | b        | 1.26, 2H, m              | 38.8, t        |                    |                          |                         |         |
|                 | g        | 0.89, 1H, m              | 23.4, d        |                    |                          |                         |         |
|                 | d        | 0.63, 3H, o. d           | 22.8, q        |                    |                          |                         |         |
|                 | d'       | 0.75, 3H, d (6.3)        | 22.0, q        |                    |                          |                         |         |
|                 | C=O      |                          | 172.1, s       |                    |                          |                         |         |

<sup>a</sup>Assignments based on HSQC, COSY, TOCSY, HMBC, and ROESY experiments. o = overlapping signal, br = broad signal,

n/d = no data

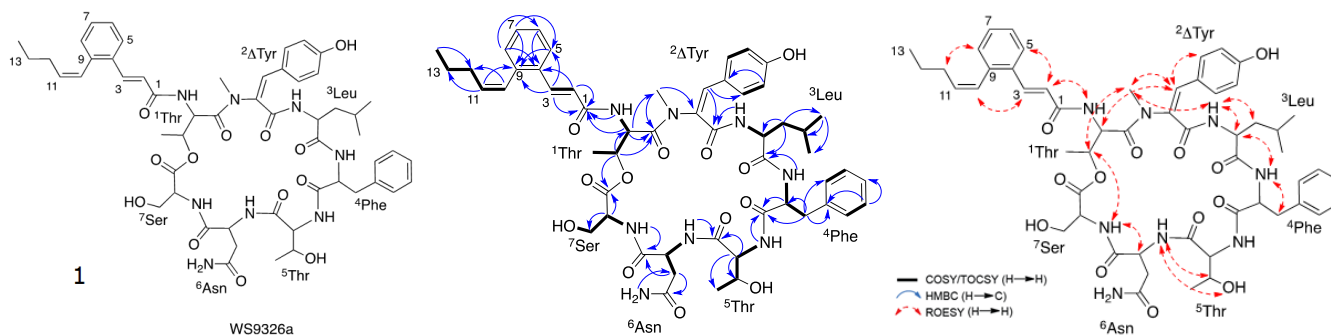

**Supplementary Table 3** High Resolution Mass Data

| <i>Compound</i>     | <i>Molecular Formula</i>                                          | <i>Calculated m/z</i> | <i>Observed m/z</i> | <i>Δppm</i> |
|---------------------|-------------------------------------------------------------------|-----------------------|---------------------|-------------|
| Acidobactin A [M+H] | C <sub>28</sub> H <sub>48</sub> N <sub>7</sub> O <sub>16</sub>    | 738.31575             | 738.31705           | 5.245       |
| Acidobactin B [M+H] | C <sub>28</sub> H <sub>48</sub> N <sub>7</sub> O <sub>15</sub>    | 722.32283             | 722.31768           | 2.609       |
| Variobactin A [M+H] | C <sub>47</sub> H <sub>84</sub> N <sub>11</sub> O <sub>17</sub>   | 1074.60462            | 1074.6093           | 4.1         |
| Potensimicin [M+H]  | C <sub>28</sub> H <sub>48</sub> NO <sub>8</sub>                   | 526.33744             | 526.33559           | 4.565       |
| Thanamycin A [M+H]  | C <sub>54</sub> H <sub>88</sub> ClN <sub>12</sub> O <sub>22</sub> | 1291.58192            | 1291.58220          | 0.205       |

**Supplementary Table 4** Acidobactin gene cluster analysis

| <b>Locus</b> | <b>Predicted Function</b>                       | <b>Strand</b> | <b>Amino Acids</b> |
|--------------|-------------------------------------------------|---------------|--------------------|
| Aave_3737    | RNA polymerase, sigma-24 subunit, ECF subfamily | -             | 177                |
| Aave_3736    | MbtH domain protein                             | -             | 95                 |
| Aave_3735    | Thioesterase                                    | -             | 258                |
| Aave_3734    | TauD dioxygenase                                | -             | 330                |
| Aave_3733    | NRPS                                            | -             | 1779               |
| Aave_3732    | PKS                                             | -             | 1535               |
| Aave_3731    | NRPS                                            | -             | 1130               |
| Aave_3730    | NRPS                                            | -             | 2651               |
| Aave_3729    | NRPS                                            | -             | 1368               |
| Aave_3728    | TonB siderophore receptor                       | +             | 733                |
| Aave_3727    | N-acetyltransferase                             | +             | 366                |
| Aave_3726    | N5-hydroxyornithine formyltransferase           | +             | 313                |
| Aave_3725    | Ferric iron reductase                           | +             | 276                |
| Aave_3724    | Cyclic peptide transporter                      | -             | 564                |
| Aave_3723    | L-lysine 6-monooxygenase                        | -             | 452                |
| Aave_3722    | Phosphopantetheinyl transferase                 | -             | 257                |

**Supplementary Table 5** NMR spectroscopic Data for acidobactin A (2), B (3), vacidobactin A (4), and B (5) (700 MHz, in D<sub>2</sub>O)<sup>a</sup>

| position           | $\delta_{\text{H}}$ mult. |                      |                      |                      | $\delta_{\text{C}}$   |                       |                       |                       |
|--------------------|---------------------------|----------------------|----------------------|----------------------|-----------------------|-----------------------|-----------------------|-----------------------|
|                    | 2                         | 3                    | 4                    | 5                    | 2 <sup>a</sup>        | 3                     | 4 <sup>a</sup>        | 5 <sup>a</sup>        |
| 1                  | 1.25, <i>d</i> , 4.0      | 1.20, <i>d</i> , 4.2 | 1.19, <i>d</i> , 3.6 | 1.19, <i>d</i> , 3.6 | 18.6, CH <sub>3</sub> | 19.3, CH <sub>3</sub> | 19.0, CH <sub>3</sub> | 19.0, CH <sub>3</sub> |
| 2                  | 5.34, <i>m</i>            | 5.48, <i>m</i>       | 5.38, <i>m</i>       | 5.37, <i>m</i>       | 68.9, CH              | 70.7, CH              | 70.6, CH              | 70.7, CH              |
| 3a                 | 2.51, <i>m</i>            | 2.73, <i>m</i>       | 2.58, <i>m</i>       | 2.58, <i>m</i>       | 34.9, CH <sub>2</sub> | 39.7, CH <sub>2</sub> | 38.4, CH <sub>2</sub> | 38.3, CH <sub>2</sub> |
| 3b                 | 2.80, <i>m</i>            | 2.81, <i>m</i>       | 2.77, <i>m</i>       | 2.71, <i>m</i>       | -                     | -                     | -                     | -                     |
| 4                  | -                         | -                    | -                    | -                    | 164.2, C              | 171.8, C              | 164.6, C              | 171.4, C              |
| 5                  | 3.36, <i>m</i>            | 3.33, <i>m</i>       | 3.31, <i>m</i>       | 3.36, <i>m</i>       | 54.4, CH              | 54.9, CH              | 52.8, CH              | 52.9, CH              |
| 6a                 | 1.61, <i>m</i>            | 1.50, <i>m</i>       | 1.63, <i>m</i>       | 1.63, <i>m</i>       | 23.1, CH <sub>2</sub> | 23.7, CH <sub>2</sub> | 22.4, CH <sub>2</sub> | 22.6, CH <sub>2</sub> |
| 6b                 | 1.59, <i>m</i>            | 1.68, <i>m</i>       | -                    | -                    | -                     | -                     | -                     | -                     |
| 7a                 | 1.71, <i>m</i>            | 1.63, <i>m</i>       | 1.83, <i>m</i>       | 1.87, <i>m</i>       | 25.4, CH <sub>2</sub> | 26.4, CH <sub>2</sub> | 28.6, CH <sub>2</sub> | 28.4, CH <sub>2</sub> |
| 7b                 | 1.80, <i>m</i>            | 1.85, <i>m</i>       | -                    | -                    | -                     | -                     | -                     | -                     |
| 8a                 | 3.55, <i>m</i>            | 3.49, <i>m</i>       | 3.38, <i>m</i>       | 3.33, <i>m</i>       | 49.9, CH <sub>2</sub> | 49.8, CH <sub>2</sub> | 52.1, CH <sub>2</sub> | 52.7, CH <sub>2</sub> |
| 8b                 | -                         | 3.90, <i>m</i>       | -                    | 3.48, <i>m</i>       | -                     | -                     | -                     | -                     |
| 9                  | 7.90, <i>s</i>            | 7.88, <i>s</i>       | 7.74, <i>s</i>       | 7.74, <i>s</i>       | 153.6, CH             | 160.0, CH             | 155.4, CH             | 155.5, CH             |
| 10                 | 4.22, <i>m</i>            | 4.35, <i>m</i>       | 4.30, <i>m</i>       | 4.17, <i>m</i>       | 68.0, CH              | 71.9, CH              | 72.3, CH              | 66.9, CH              |
| 11a                | 2.79, <i>m</i>            | 2.59, <i>m</i>       | 2.71, <i>m</i>       | 2.69, <i>m</i>       | 39.0, CH <sub>2</sub> | 38.9, CH <sub>2</sub> | 43.2, CH              | 43.1, CH              |
| 11b                | -                         | 2.69, <i>m</i>       | -                    | -                    | -                     | -                     | -                     | -                     |
| 11-CH <sub>3</sub> | -                         | -                    | 1.03, <i>d</i>       | 1.02, <i>d</i>       | -                     | -                     | 12.8, CH <sub>3</sub> | 12.7, CH <sub>3</sub> |
| 12                 | -                         | -                    | -                    | -                    | 173.4, C              | 172.3, C              | 177.0, C              | 177.1, C              |
| 13                 | 4.23, <i>m</i>            | 4.40, <i>d</i> , 1.8 | 4.41, <i>m</i>       | 4.44, <i>m</i>       | 58.7, CH              | 60.8, CH              | 56.2, CH              | 55.6, CH              |
| 14                 | 4.22, <i>m</i>            | 4.31, <i>m</i>       | 4.26, <i>m</i>       | 4.19, <i>m</i>       | 66.3, CH              | 66.5, CH              | 66.8, CH              | 66.4, CH              |
| 15                 | 1.10, <i>d</i> , 3.8      | 1.07, <i>d</i> , 4.0 | 1.10, <i>m</i>       | 1.08, <i>m</i>       | 18.8, CH <sub>3</sub> | 19.1, CH <sub>3</sub> | 19.2, CH <sub>3</sub> | 19.1, CH <sub>3</sub> |
| 16                 | -                         | -                    | -                    | -                    | 174.1, C              | 174.1, C              | 172.3, C              | 173.9, C              |
| 17                 | 4.36, <i>m</i>            | 4.60, <i>t</i> , 3.6 | 4.40, <i>m</i>       | 4.41, <i>m</i>       | 53.6, CH              | 54.1, CH              | 55.3, CH              | 55.1, CH              |
| 18a                | 1.62, <i>m</i>            | 1.71, <i>m</i>       | 1.60, <i>m</i>       | 1.62, <i>m</i>       | 27.7, CH <sub>2</sub> | 27.9, CH <sub>2</sub> | 28.4, CH <sub>2</sub> | 28.3, CH <sub>2</sub> |
| 18b                | 1.84, <i>m</i>            | 2.61, <i>m</i>       | -                    | -                    | -                     | -                     | -                     | -                     |
| 19a                | 1.71, <i>m</i>            | 1.81, <i>m</i>       | 1.85, <i>m</i>       | 1.81, <i>m</i>       | 23.7, CH <sub>2</sub> | 22.1, CH <sub>2</sub> | 22.6, CH <sub>2</sub> | 22.4, CH <sub>2</sub> |
| 19b                | 1.87, <i>m</i>            | 2.12, <i>m</i>       | -                    | -                    | -                     | -                     | -                     | -                     |
| 20a                | 3.55, <i>m</i>            | 3.32, <i>m</i>       | 3.41                 | 3.37                 | 50.3, CH <sub>2</sub> | 49.3, CH <sub>2</sub> | 51.4, CH <sub>2</sub> | 49.8, CH <sub>2</sub> |
| 20b                | -                         | 3.96, <i>m</i>       | -                    | 3.65                 | -                     | -                     | -                     | -                     |
| 21                 | -                         | -                    | -                    | -                    | 172.9, C              | 174.2, C              | 172.7, C              | 174.9, C              |
| 22                 | 4.41, <i>m</i>            | 4.44, <i>m</i>       | 4.30, <i>m</i>       | 4.27, <i>m</i>       | 56.3, CH              | 55.7, CH              | 54.7, CH              | 54.4, CH              |
| 23a                | 3.83, <i>d</i> , 8.5      | 3.84, <i>d</i> , 9.0 | 3.90, <i>m</i>       | 3.85, <i>m</i>       | 61.3, CH              | 61.1, CH              | 61.3, CH              | 61.5, CH              |
| 23b                | -                         | 3.95, <i>d</i> , 9.0 | -                    | -                    | -                     | -                     | -                     | -                     |
| 24                 | -                         | -                    | -                    | -                    | 171.6, C              | 172.5, C              | 169.3, C              | 169.4, C              |
| 25                 | 4.82, <i>m</i>            | 4.50, <i>m</i>       | 4.80, <i>m</i>       | 4.59, <i>m</i>       | 56.8, CH              | 56.2, CH              | 56.4, CH              | 51.9, CH              |
| 26                 | 4.31, <i>m</i>            | 4.25, <i>m</i>       | 3.90, <i>m</i>       | 3.87, <i>m</i>       | 74.7, CH              | 72.4, CH              | 73.9, CH              | 73.6, CH              |
| 27                 | -                         | -                    | -                    | -                    | 180.0, C              | 175.6, C              | 179.6, C              | 181.4, C              |
| 28                 | -                         | -                    | -                    | -                    | 169.6, C              | 169.1, C              | 177.9, C              | 177.7, C              |

<sup>a</sup> <sup>13</sup>C NMR were extracted from HMBC spectra.

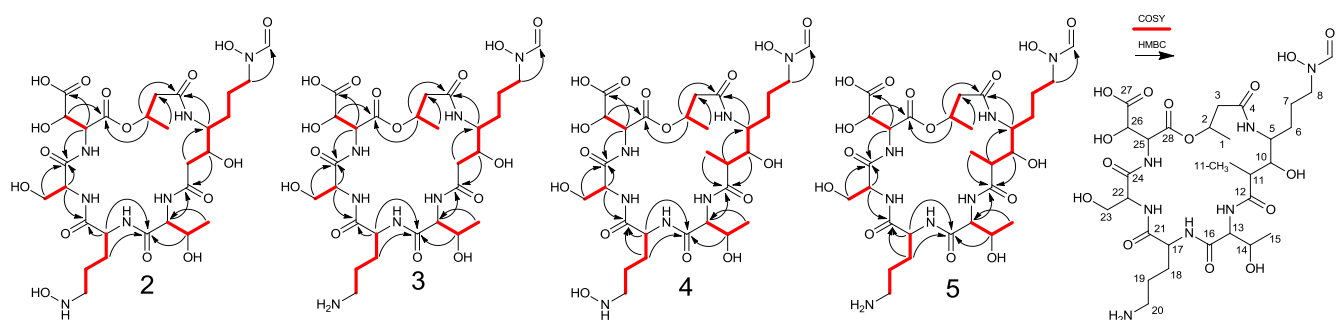

**Supplementary Table 6** Vacidobactin gene cluster analysis

| <b>Locus</b> | <b>Predicted Function</b>                       | <b>Strand</b> | <b>Amino Acids</b> |
|--------------|-------------------------------------------------|---------------|--------------------|
| Vapar_3752   | RNA polymerase, sigma-24 subunit, ECF subfamily | -             | 181                |
| Vapar_3751   | anti-FecI sigma factor                          | -             | 67                 |
| Vapar_3750   | MbtH domain protein                             | -             | 85                 |
| Vapar_3749   | Thioesterase                                    | -             | 246                |
| Vapar_3748   | Phosphopantetheinyl transferase                 | -             | 229                |
| Vapar_3747   | TauD dioxygenase                                | -             | 330                |
| Vapar_3746   | NRPS                                            | -             | 1776               |
| Vapar_3745   | PKS                                             | -             | 1520               |
| Vapar_3744   | NRPS                                            | -             | 1110               |
| Vapar_3743   | NRPS                                            | -             | 2626               |
| Vapar_3742   | NRPS                                            | -             | 1358               |
| Vapar_3741   | TonB siderophore receptor                       | +             | 723                |
| Vapar_3740   | L-lysine 6-monooxygenase                        | +             | 439                |
| Vapar_3739   | N-acetyltransferase                             | +             | 344                |
| Vapar_3738   | N5-hydroxyornithine formyltransferase           | +             | 281                |
| Vapar_3737   | Ferric iron reductase                           | +             | 281                |
| Vapar_3736   | Cyclic peptide transporter                      | -             | 563                |

**Supplementary Table 7** Variobactin gene cluster analysis

| <b>Locus</b> | <b>Predicted Function</b>       | <b>Strand</b> | <b>Amino Acids</b> |
|--------------|---------------------------------|---------------|--------------------|
| Var1         | Thioesterase                    | +             | 278                |
| Var2         | Phosphopantetheinyl transferase | +             | 234                |
| Var3         | NRPS                            | +             | 1741               |
| Var4         | PKS                             | +             | 2346               |
| Var5         | NRPS                            | +             | 1038               |
| Var6         | NRPS                            | +             | 2585               |
| Var7         | NRPS                            | +             | 2431               |
| Var8         | TonB receptor                   | -             | 816                |
| Var9         | FecR-like protein               | -             | 343                |
| Var10        | RNA polymerase subunit sigma-24 | -             | 193                |
| Var11        | L-lysine 6-monooxygenase        | -             | 440                |
| Var12        | N-acetyltransferase             | -             | 369                |
| Var13        | Ferric iron reductase           | -             | 262                |
| Var14        | Cyclic peptide transporter      | +             | 560                |

**Supplementary Table 8** NMR spectroscopic data for variobactin A (6) (700 MHz, in DMSO-*d*<sub>6</sub>)<sup>a</sup>.

| Position | $\delta_{\text{H}}$ mult. | $\delta_{\text{C}}$        | Position | $\delta_{\text{H}}$ mult. | $\delta_{\text{C}}$   |
|----------|---------------------------|----------------------------|----------|---------------------------|-----------------------|
| 1        | 0.89 ( <i>t</i> , 7.2)    | 14.4, CH <sub>3</sub>      | 34       | -                         | -                     |
| 2        | 1.23 ( <i>ov</i> )        | 22.5, CH <sub>2</sub>      | 35a      | 3.81 ( <i>m</i> )         | 49.4, CH <sub>2</sub> |
| 3        | 1.23 ( <i>ov</i> )        | 31.7, CH <sub>2</sub>      | 35b      | 3.36 ( <i>m</i> )         | 23.7, CH <sub>2</sub> |
| 4-9      | 1.23 ( <i>ov</i> )        | 28.5-29.5, CH <sub>2</sub> | 36       | 2.06 ( <i>m</i> )         | 29.3, CH <sub>2</sub> |
| 10       | 1.45 ( <i>m</i> )         | 25.9, CH <sub>2</sub>      | 37a      | 1.45 ( <i>m</i> )         | 50.4, CH              |
| 11       | 2.04 ( <i>m</i> )         | 36.0, CH <sub>2</sub>      | 37b      | 1.14 ( <i>m</i> )         | 171.1, C              |
| 12       | -                         | 172.2, C                   | 38       | 3.59 ( <i>ov</i> )        | -                     |
| 13       | 7.84 ( <i>broad</i> )     | -                          | 39       | -                         | -                     |
| 14       | 2.03 ( <i>s</i> )         | 16.6, CH <sub>3</sub>      | 40       | 7.78 ( <i>d</i> , 9.9)    | -                     |
| 15       | -                         | 159.8, C                   | 41       | -                         | -                     |
| 16a      | 3.90 ( <i>m</i> )         | 47.2, CH <sub>2</sub>      | 42       | -                         | 157.3, C              |
| 16b      | 3.70 ( <i>m</i> )         | 29.0, CH <sub>2</sub>      | 43       | 8.06 ( <i>broad</i> )     | -                     |
| 17       | 1.85 ( <i>m</i> )         | 49.9, CH                   | 44a      | 2.94 ( <i>m</i> )         | 40.9, CH <sub>2</sub> |
| 18a      | 1.85 ( <i>m</i> )         | 74.5, CH                   | 44b      | 3.15 ( <i>m</i> )         | 25.5, CH <sub>2</sub> |
| 18b      | 1.56 ( <i>m</i> )         | 44.3, CH                   | 45a      | 1.22 ( <i>m</i> )         | -                     |
| 19       | 4.36 ( <i>m</i> )         | 16.8, CH <sub>3</sub>      | 45b      | 1.46 ( <i>m</i> )         | -                     |
| 20       | 3.40 ( <i>m</i> )         | -                          | 46a      | 2.37 ( <i>m</i> )         | 50.5, CH              |
| 21       | 2.14 ( <i>m</i> )         | -                          | 46b      | 1.63 ( <i>m</i> )         | 172.1, C              |
| 22       | 1.26 ( <i>ov</i> )        | -                          | 47       | 4.64 ( <i>m</i> )         | -                     |
| 23       | -                         | 175.3, C                   | 48       | -                         | -                     |
| 24       | 9.04 ( <i>d</i> , 7.6)    | -                          | 49       | -                         | -                     |
| 25       | -                         | 179.6, C                   | 50       | 1.99 ( <i>s</i> )         | 16.9, CH <sub>3</sub> |
| 26       | 4.29 ( <i>d</i> , 2.1)    | 74.1, CH                   | 51       | -                         | 161.7, C              |
| 27       | 4.19 ( <i>d</i> , 9.3)    | 58.8, CH                   | 52a      | 3.66 ( <i>m</i> )         | 48.8, CH <sub>2</sub> |
| 28       | -                         | 174.4, C                   | 52b      | 3.32 ( <i>m</i> )         | -                     |
| 29       | 6.89 ( <i>d</i> , 4.9)    | -                          | 53a      | 1.74 ( <i>m</i> )         | 22.0, CH <sub>2</sub> |
| 30a      | 3.70 ( <i>d</i> , 5.7)    | 62.9, CH <sub>2</sub>      | 53b      | 1.28 ( <i>m</i> )         | -                     |
| 30b      | 3.18 ( <i>m</i> )         | -                          | 54a      | 1.99 ( <i>m</i> )         | 30.1, CH <sub>2</sub> |
| 31       | 4.52 ( <i>m</i> )         | 53.8, CH                   | 54b      | 1.86 ( <i>m</i> )         | -                     |
| 32       | -                         | 170.3, C                   | 55       | 4.20 ( <i>d</i> , 9.3)    | 61.3, CH              |
| 33       | 7.26 ( <i>d</i> , 8.66)   | -                          | 56       | -                         | 170.6, C              |

<sup>a</sup>Chemical shift  $\delta$  and (multiplicity, *J* in Hz).

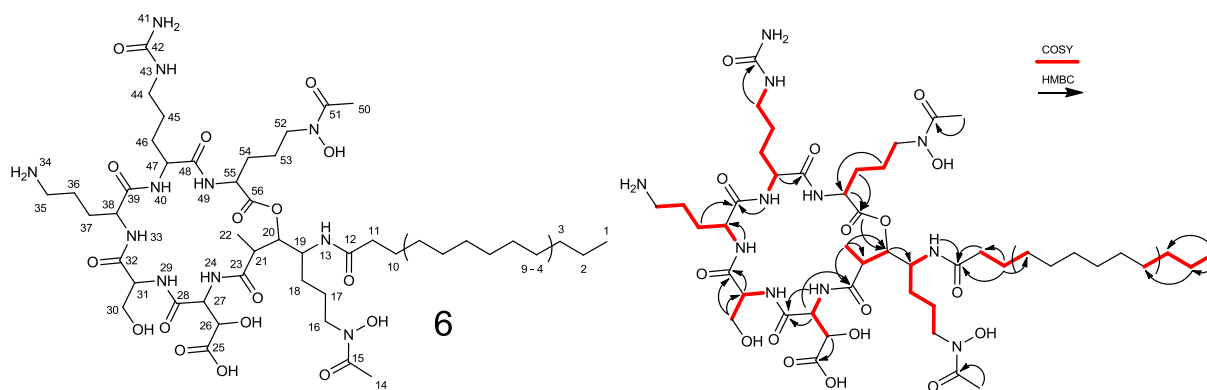

**Supplementary Table 9** Hidden Markov models for sugar biosynthesis

| Domain                         | Abbreviation | Hidden Markov model           | Number of sequences | Cutoff |
|--------------------------------|--------------|-------------------------------|---------------------|--------|
| <b>2,3-dehydratase</b>         | 2,3DH        | 2_3_dehydratase.hmm           | 23                  | 100.0  |
| <b>3,4-dehydratase</b>         | 3,4DH        | 3_4_dehydratase.hmm           | 10                  | 600.0  |
| <b>3,4-ketoisomerase</b>       | 3,4IM        | 3_4_ketoisomerase.hmm         | 8                   | 150.0  |
| <b>3-aminotransferase</b>      | 3-AmT        | 3_aminotransferase.hmm        | 13                  | 451.0  |
| <b>3-ketoreductase</b>         | 3KR          | 3_ketoreductase.hmm           | 15                  | 200.0  |
| <b>4,6-dehydratase</b>         | 4,6DH        | 4_6_dehydratase.hmm           | 21                  | 400.0  |
| <b>4-aminotransferase</b>      | 4-AmT        | 4_aminotransferase.hmm        | 9                   | 350.0  |
| <b>4-ketoreductase</b>         | 4KR          | 4_ketoreductase.hmm           | 26                  | 190.0  |
| <b>Acetyltransferase</b>       | AcT          | acetyltransferase.hmm         | 4                   | 160.0  |
| <b>Carbamoyltransferase</b>    | CarbT        | carbamoyltransferase.hmm      | 2                   | 845.0  |
| <b>Decarboxylase</b>           | UDP-DC       | decarboxylase_epimerase.hmm   | 15                  | 400.0  |
| <b>Dehydrogenase</b>           | UDP-DH       | pentose_dehydrogenase.hmm     | 15                  | 400.0  |
| <b>Epimerase</b>               | E            | epimerase.hmm                 | 22                  | 160.0  |
| <b>Glycosyltransferase</b>     | GTr          | glycosyltransferase.hmm       | 82                  | 125.0  |
| <b>N-ethyltransferase</b>      | N-ET         | n_ethyltransferase.hmm        | 2                   | 500.0  |
| <b>N,N-dimethyltransferase</b> | N,N-MT       | n_n_dimethyltransferase.hmm   | 10                  | 147.0  |
| <b>Oxidative deaminase</b>     | OxDA         | oxidative_deaminase.hmm       | 10                  | 500.0  |
| <b>Oxidoreductase</b>          | Ox           | oxidoreductase.hmm            | 6                   | 500.0  |
| <b>Pyrrolyltransferase</b>     | PyT          | pyrrolyltransferase.hmm       | 4                   | 350.0  |
| <b>C-methyltransferase</b>     | CMT          | sugar_c_methyltransferase.hmm | 20                  | 400.0  |
| <b>N-methyltransferase</b>     | NMT          | sugar_n_methyltransferase.hmm | 5                   | 180.0  |
| <b>O-methyltransferase</b>     | OMT          | sugar_o_methyltransferase.hmm | 40                  | 147.0  |
| <b>Thiosugar synthase</b>      | ThiS         | thiosugar_synthase.hmm        | 3                   | 300.0  |

**Supplementary Table 10** Rules for sugar biosynthesis

| Sugar                         | SMILES                                    | Genes                                                                                                                           |
|-------------------------------|-------------------------------------------|---------------------------------------------------------------------------------------------------------------------------------|
| <b>L-aculose</b>              | <chem>CC1O[C@H](C=CC1=O)O</chem>          | 4,6-dehydratase<br>2,3-dehydratase<br>3,4-dehydratase<br>3-ketoreductase<br>4-ketoreductase<br>Epimerase<br>Oxidoreductase      |
| <b>L-cinerulose A</b>         | <chem>CC1O[C@H](CCC1=O)O</chem>           | 4,6-dehydratase<br>2,3-dehydratase<br>3,4-dehydratase<br>3-ketoreductase<br>4-ketoreductase<br>Epimerase                        |
| <b>L-rhodinose</b>            | <chem>C[C@@H]1O[C@@H](CC[C@@H]1O)O</chem> | 4,6-dehydratase<br>2,3-dehydratase<br>3,4-dehydratase<br>3-ketoreductase<br>4-ketoreductase<br>Epimerase                        |
| <b>Rednose</b>                | <chem>CC1OC(C(N)=CC1=O)O</chem>           | 4,6-dehydratase<br>2,3-dehydratase<br>3,4-dehydratase<br>3-ketoreductase<br>4-ketoreductase<br>Epimerase                        |
| <b>L-cinerulose B</b>         | <chem>CC1O[C@H]([C@@H](O)CC1=O)O</chem>   | 4,6-dehydratase<br>2,3-dehydratase<br>3,4-dehydratase<br>3-ketoreductase<br>4-ketoreductase<br>Epimerase                        |
| <b>O-methyl-L-amicetose</b>   | <chem>COC1CC[C@@H](O[C@H]1C)O</chem>      | 4,6-dehydratase<br>2,3-dehydratase<br>3,4-dehydratase<br>3-ketoreductase<br>4-ketoreductase<br>Epimerase<br>O-methyltransferase |
| <b>4-O-methyl-L-rhodinose</b> | <chem>CO[C@H]1CC[C@@H](O[C@H]1C)O</chem>  | 4,6-dehydratase<br>2,3-dehydratase<br>3,4-dehydratase<br>3-ketoreductase<br>4-ketoreductase<br>Epimerase<br>O-methyltransferase |



| Sugar                      | SMILES                                       | Genes                                                                                                                     |
|----------------------------|----------------------------------------------|---------------------------------------------------------------------------------------------------------------------------|
| <b>L-daunosamine</b>       | <chem>C[C@@H]1OC(C[C@@H]([C@@H]1O)N)O</chem> | 4,6-dehydratase<br>2,3-dehydratase<br>4-ketoreductase<br>Epimerase<br>3-aminotransferase                                  |
| <b>L-ristosamine</b>       | <chem>CC1OC(CC(C1O)N)O</chem>                | 4,6-dehydratase<br>2,3-dehydratase<br>4-ketoreductase<br>Epimerase<br>4-aminotransferase                                  |
| <b>D-digitoxose</b>        | <chem>CC1OC(CC(C1O)O)O</chem>                | 4,6-dehydratase<br>2,3-dehydratase<br>3-ketoreductase<br>4-ketoreductase                                                  |
| <b>L-digitoxose</b>        | <chem>CC1OC(CC(C1O)O)O</chem>                | 4,6-dehydratase<br>2,3-dehydratase<br>3-ketoreductase<br>4-ketoreductase<br>Epimerase                                     |
| <b>2-deoxy-L-fucose</b>    | <chem>CC1OC(CC(C1O)O)O</chem>                | 4,6-dehydratase<br>2,3-dehydratase<br>3-ketoreductase<br>4-ketoreductase<br>Epimerase                                     |
| <b>D-olivose</b>           | <chem>CC1O[C@@H](C[C@H]([C@@H]1O)O)O</chem>  | 4,6-dehydratase<br>2,3-dehydratase<br>3-ketoreductase<br>4-ketoreductase<br>Epimerase                                     |
| <b>D-oliose</b>            | <chem>CC1O[C@H](C[C@H]([C@H]1O)O)O</chem>    | 4,6-dehydratase<br>2,3-dehydratase<br>3-ketoreductase<br>4-ketoreductase                                                  |
| <b>4-oxo-L-vancosamine</b> | <chem>C[C@@H]1OC(C[C@](N)(C1=O)C)O</chem>    | 4,6-dehydratase<br>2,3-dehydratase<br>Epimerase<br>4-aminotransferase<br>C-methyltransferase                              |
| <b>D-forosamine</b>        | <chem>CC1OC(CC[C@@H]1N(C)C)O</chem>          | 4,6-dehydratase<br>2,3-dehydratase<br>3,4-dehydratase<br>3-ketoreductase<br>4-aminotransferase<br>N,N-dimethyltransferase |
| <b>L-actinosamine</b>      | <chem>COC1C(OC(CC1N)O)C</chem>               | 4,6-dehydratase<br>2,3-dehydratase                                                                                        |

| Sugar                              | SMILES                                                | Genes                                                                                                           |
|------------------------------------|-------------------------------------------------------|-----------------------------------------------------------------------------------------------------------------|
| <b>L-vancosamine</b>               | <chem>OC1O[C@H]([C@@H](O)[C@](C1)(N)C)C</chem>        | 4,6-dehydratase<br>2,3-dehydratase<br>4-ketoreductase<br>Epimerase<br>3-aminotransferase<br>C-methyltransferase |
| <b>L-vicenisamine</b>              | <chem>CN[C@@H]1C(CC(OC1C)O)O</chem>                   | 4,6-dehydratase<br>2,3-dehydratase<br>3-ketoreductase<br>4-aminotransferase<br>N-methyltransferase              |
| <b>D-chalcose</b>                  | <chem>CO[C@H]1C[C@H](OC([C@@H]1O)O)C</chem>           | 4,6-dehydratase<br>3-ketoreductase<br>4-aminotransferase<br>O-methyltransferase<br>Oxidative deaminase          |
| <b>D-mycarose</b>                  | <chem>CC1OC(C[C@](O)([C@H]1O)C)O</chem>               | 4,6-dehydratase<br>2,3-dehydratase<br>3-ketoreductase<br>4-ketoreductase<br>Epimerase<br>O-methyltransferase    |
| <b>L-oleandrose</b>                | <chem>CO[C@H]1C[C@H](O[C@H]([C@@H]1O)C)O</chem>       | 4,6-dehydratase<br>2,3-dehydratase<br>3-ketoreductase<br>4-ketoreductase<br>Epimerase<br>O-methyltransferase    |
| <b>Olivomose</b>                   | <chem>COC1C(CC(OC1C)O)O</chem>                        | 4,6-dehydratase<br>2,3-dehydratase<br>3-ketoreductase<br>4-ketoreductase<br>O-methyltransferase                 |
| <b>D-mycosamine</b>                | <chem>C[C@H]1O[C@H]([C@H]([C@H]([C@@H]1O)N)O)O</chem> | 4,6-dehydratase<br>3,4-ketoisomerase<br>3-aminotransferase<br>O-methyltransferase                               |
| <b>4-deoxy-4-thio-D-digitoxose</b> | <chem>CC1O[C@H](C[C@H](C1S)O)O</chem>                 | 4,6-dehydratase<br>2,3-dehydratase<br>3-ketoreductase<br>Epimerase<br>Thiosugar synthase                        |
| <b>D-fucofuranose</b>              | <chem>C[C@H]([C@H]1O[C@H]([C@H](C1O)O)O)O</chem>      | 4,6-dehydratase<br>4-ketoreductase                                                                              |
| <b>D-fucose</b>                    | <chem>CC1OC([C@@H]([C@H]([C@H]1O)O)O)O</chem>         | 4,6-dehydratase<br>4-ketoreductase                                                                              |

| Sugar                                                      | SMILES                                                   | Genes                                                                                                                                  |
|------------------------------------------------------------|----------------------------------------------------------|----------------------------------------------------------------------------------------------------------------------------------------|
| <b>D-rhamnose</b>                                          | <chem>C[C@@H]1O[C@@H]([C@@H]([C@@H]([C@H]1O)O)O)O</chem> | 4,6-dehydratase<br>4-ketoreductase<br>Epimerase                                                                                        |
| <b>4-N-ethyl-4-amino-3-O-methoxy-2,4,5-trideoxypentose</b> | <chem>CCN[C@H]1CO[C@H](C[C@H]1OC)O</chem>                | Dehydrogenase<br>Decarboxylase<br>2,3-dehydratase<br>3-ketoreductase<br>4-aminotransferase<br>N-ethyltransferase                       |
| <b>D-3-N-methyl-4-O-methyl-L-ristosamine</b>               | <chem>CN[C@H]1CC(OC([C@@H]1OC)C)O</chem>                 | 4,6-dehydratase<br>2,3-dehydratase<br>4-ketoreductase<br>Epimerase<br>4-aminotransferase<br>N-methyltransferase<br>O-methyltransferase |
| <b>N,N-dimethyl-L-pyrrolosamine</b>                        | <chem>CC1OC(CC(C1N(C)C)O)O</chem>                        | 4,6-dehydratase<br>2,3-dehydratase<br>3-ketoreductase<br>Epimerase<br>4-aminotransferase<br>N,N-dimethyltransferase                    |
| <b>D-desosamine</b>                                        | <chem>C[C@@H]1C[C@H](N(C)C)[C@@H](O)[C@H](O)O1</chem>    | 4,6-dehydratase<br>3,4-dehydratase<br>3-aminotransferase<br>N,N-dimethyltransferase<br>Oxidative deaminase                             |
| <b>L-megosamine</b>                                        | <chem>C[C@@H]1OC(C[C@@H](N(C)C)[C@H]1O)O</chem>          | 4,6-dehydratase<br>2,3-dehydratase<br>4-ketoreductase<br>Epimerase<br>3-aminotransferase<br>N,N-dimethyltransferase                    |
| <b>Nogalamine</b>                                          | <chem>OC1O[C@@H](C)[C@H](O)[C@@H](N(C)C)[C@@H]1O</chem>  | 4,6-dehydratase<br>2,3-dehydratase<br>4-ketoreductase<br>Epimerase<br>3-aminotransferase<br>N,N-dimethyltransferase                    |
| <b>L-rhodamine</b>                                         | <chem>CC1O[C@H](CC(N(C)C)[C@H]1O)O</chem>                | 4,6-dehydratase<br>2,3-dehydratase<br>4-ketoreductase<br>Epimerase<br>3-aminotransferase<br>N,N-dimethyltransferase                    |

| Sugar                                        | SMILES                                                 | Genes                                                                                                                               |
|----------------------------------------------|--------------------------------------------------------|-------------------------------------------------------------------------------------------------------------------------------------|
| <b>D-angolosamine</b>                        | <chem>C[C@@H]1OC(CC(N(C)C)[C@H]1O)O</chem>             | 4,6-dehydratase<br>2,3-dehydratase<br>4-ketoreductase<br>3-aminotransferase<br>N,N-dimethyltransferase                              |
| <b>Kedarsamine</b>                           | <chem>OC1O[C@@H](C)[C@@H](N(C)C)[C@@H](O)C1</chem>     | 4,6-dehydratase<br>2,3-dehydratase<br>3-ketoreductase<br>4-aminotransferase<br>N,N-dimethyltransferase                              |
| <b>L-noviose</b>                             | <chem>CC1(C)[C@H](O)[C@@H](O)[C@@H](O)C(O)O1</chem>    | 4,6-dehydratase<br>4-ketoreductase<br>Epimerase<br>C-methyltransferase                                                              |
| <b>L-cladinose</b>                           | <chem>C[C@H]1[C@H](O)[C@](C)(OC)CC(O)O1</chem>         | 4,6-dehydratase<br>2,3-dehydratase<br>3-ketoreductase<br>4-ketoreductase<br>Epimerase<br>C-methyltransferase<br>O-methyltransferase |
| <b>2-N-methyl-D-fucosamine</b>               | <chem>CN[C@H]1C(O[C@@H]([C@@H]([C@@H]1O)O)C)O</chem>   | 4,6-dehydratase<br>2,3-dehydratase<br>4-ketoreductase<br>N-methyltransferase                                                        |
| <b>D-digitalose</b>                          | <chem>CO[C@H]1[C@H]([C@H](O[C@H]([C@@H]1O)O)C)O</chem> | 4,6-dehydratase<br>4-ketoreductase<br>O-methyltransferase                                                                           |
| <b>2-O-methyl-rhamnose</b>                   | <chem>COC1[C@H]([C@H](OC([C@H]1O)O)C)O</chem>          | 4,6-dehydratase<br>4-ketoreductase<br>Epimerase<br>O-methyltransferase                                                              |
| <b>3-O-methyl-rhamnose</b>                   | <chem>COC1[C@@H](OC([C@@H](C1O)O)C)O</chem>            | 4,6-dehydratase<br>4-ketoreductase<br>Epimerase<br>O-methyltransferase                                                              |
| <b>6-deoxy-3-C-methyl-L-mannose</b>          | <chem>C[C@@H]1OC([C@@H]([C@](O)([C@H]1O)C)O)O</chem>   | 4,6-dehydratase<br>4-ketoreductase<br>Epimerase<br>C-methyltransferase                                                              |
| <b>4,6-dideoxy-4-hydroxylamino-D-glucose</b> | <chem>CC1OC(C(C(C1NO)O)O)O</chem>                      | 4,6-dehydratase<br>4-aminotransferase                                                                                               |

| Sugar                               | SMILES                                                      | Genes                                                                                                                             |
|-------------------------------------|-------------------------------------------------------------|-----------------------------------------------------------------------------------------------------------------------------------|
| <b>3-N,N-dimethyl-L-eremosamine</b> | <chem>OC1C[C@](C)(N(C)C)[C@@H](O)[C@H](C)O1</chem>          | 4,6-dehydratase<br>2,3-dehydratase<br>4-ketoreductase<br>Epimerase<br>C-methyltransferase<br>N,N-dimethyltransferase              |
| <b>Chromose</b>                     | <chem>CC1OC(CC(C1OC(C)=O)O)O</chem>                         | 4,6-dehydratase<br>2,3-dehydratase<br>3-ketoreductase<br>4-ketoreductase<br>Acetyltransferase                                     |
| <b>4-O-carbamoyl-D-olivose</b>      | <chem>CC1OC(CC(C1OC(N)=O)O)O</chem>                         | 4,6-dehydratase<br>2,3-dehydratase<br>3-ketoreductase<br>4-ketoreductase<br>Carbamoyltransferase                                  |
| <b>D-ravidosamine</b>               | <chem>C[C@H]1O[C@@H]([C@@H]([C@@H](N(C)C)[C@H]1O)O)O</chem> | 4,6-dehydratase<br>3,4-ketoisomerase<br>3-aminotransferase<br>N,N-dimethyltransferase                                             |
| <b>3-N,N-dimethyl-D-mycosamine</b>  | <chem>C[C@H]1O[C@H]([C@@H]([C@@H](N(C)C)[C@H]1O)O)O</chem>  | 4,6-dehydratase<br>3,4-ketoisomerase<br>3-aminotransferase<br>N,N-dimethyltransferase                                             |
| <b>2,3-O-dimethyl-L-rhamnose</b>    | <chem>COC1[C@@H](OC([C@@H](C1OC)O)C)O</chem>                | 4,6-dehydratase<br>4-ketoreductase<br>Epimerase<br>O-methyltransferase                                                            |
| <b>2,4-O-dimethyl-L-rhamnose</b>    | <chem>CO[C@H]1C(O[C@H](C(C1O)O)C)O</chem>                   | 4,6-dehydratase<br>4-ketoreductase<br>Epimerase<br>O-methyltransferase                                                            |
| <b>3,4-O-dimethyl-L-rhamnose</b>    | <chem>CO[C@H]1C(O[C@H](C(C1OC)O)O)C</chem>                  | 4,6-dehydratase<br>4-ketoreductase<br>Epimerase<br>O-methyltransferase                                                            |
| <b>2-thioglucose</b>                | <chem>OC1[C@H](S)[C@@H](O)[C@H](O)[C@@H](CO)O1</chem>       | Thiosugar synthase                                                                                                                |
| <b>Olivomycose</b>                  | <chem>C[C@@H]1O[C@H](C[C@](O)([C@H]1OC(C)=O)C)O</chem>      | 4,6-dehydratase<br>2,3-dehydratase<br>3-ketoreductase<br>4-ketoreductase<br>Epimerase<br>C-methyltransferase<br>Acetyltransferase |

| Sugar                                                    | SMILES                                                                          | Genes                                                                                                                             |
|----------------------------------------------------------|---------------------------------------------------------------------------------|-----------------------------------------------------------------------------------------------------------------------------------|
| <b>4-N,N-dimethylamino-4-deoxy-5-C-methyl-l-rhamnose</b> | <chem>CN(C1C(C(C(OC1(C)C)O)O)O)C</chem>                                         | 4,6-dehydratase<br>Epimerase<br>4-aminotransferase<br>C-methyltransferase<br>N,N-dimethyltransferase<br>Acetyltransferase         |
| <b>2,3,4-tri-O-methylrhamnose</b>                        | <chem>CO[C@@H]1[C@H](O[C@@H]([C@H]([C@H]1OC)OC)O)C</chem>                       | 4,6-dehydratase<br>4-ketoreductase<br>Epimerase<br>O-methyltransferase                                                            |
| <b>4-O-acetyl-L-arcanose</b>                             | <chem>OC1C[C@@](C)(OC)[C@H](OC(C)=O)[C@H](C)O1</chem>                           | 4,6-dehydratase<br>2,3-dehydratase<br>3-ketoreductase<br>4-ketoreductase<br>Epimerase<br>C-methyltransferase<br>Acetyltransferase |
| <b>3-N-acetyl-D-ravidosamine</b>                         | <chem>C[C@H]1O[C@@H]([C@@H]([C@@H]([C@@H](N(C(C)=O)C)[C@H]1OC(C)=O)O)O)O</chem> | 4,6-dehydratase<br>3,4-ketoisomerase<br>3-aminotransferase<br>N,N-dimethyltransferase<br>Acetyltransferase                        |
| <b>3-O-carbamoyl-L-noviose</b>                           | <chem>CC1([C@@H]([C@H]([C@H](C(O1)O)O)OC(N)=O)O)C</chem>                        | 4,6-dehydratase<br>2,3-dehydratase<br>4-ketoreductase<br>C-methyltransferase<br>Carbamoyltransferase                              |
| <b>L-nogalose</b>                                        | <chem>COC1C(OC(C(C1(OC)C)OC)O)C</chem>                                          | 4,6-dehydratase<br>4-ketoreductase<br>Epimerase<br>C-methyltransferase<br>O-methyltransferase                                     |
| <b>4-O-acetyl-D-ravidosamine</b>                         | <chem>C[C@H]1O[C@@H]([C@@H]([C@@H]([C@@H](N(C)C)[C@H]1OC(C)=O)O)O)O</chem>      | 4,6-dehydratase<br>3,4-ketoisomerase<br>3-aminotransferase<br>N,N-dimethyltransferase<br>Acetyltransferase                        |
| <b>3-O-carbamoyl-4-O-methyl-L-noviose</b>                | <chem>CC1(C)[C@H](OC)[C@@H](OC(N)=O)[C@@H](O)C(O)O1</chem>                      | 4,6-dehydratase<br>2,3-dehydratase<br>4-ketoreductase<br>C-methyltransferase<br>O-methyltransferase<br>Carbamoyltransferase       |
| <b>3-N-acetyl-4-O-acetyl-D-ravidosamine</b>              | <chem>C[C@H]1O[C@@H]([C@@H]([C@@H]([C@@H](N(C(C)=O)C)[C@H]1OC(C)=O)O)O)O</chem> | 4,6-dehydratase<br>3,4-ketoisomerase<br>3-aminotransferase<br>N,N-dimethyltransferase<br>Acetyltransferase                        |

| Sugar                                                         | SMILES                                                               | Genes                                                                                                                |
|---------------------------------------------------------------|----------------------------------------------------------------------|----------------------------------------------------------------------------------------------------------------------|
| <b>3-(5'-methyl-2'-pyrrolylcarbonyl)-4-O-methyl-L-noviose</b> | <chem>CO[C@@H]1[C@@H](C([C@@H](OC1(C)C)O)O)OC(C2=CC=C(N2)C)=O</chem> | 4,6-dehydratase<br>4-ketoreductase<br>Epimerase<br>C-methyltransferase<br>O-methyltransferase<br>Pyrrolyltransferase |
| <b>Madurose</b>                                               | <chem>O[C@@H]1[C@H](O)[C@@](O)(C)[C@H](N)CO1</chem>                  | Dehydrogenase<br>Decarboxylase<br>C-methyltransferase<br>4-aminotransferase                                          |
| <b>4-N-methyl-4-amino-3-O-methoxy-2,4,5-trideoxypentose</b>   | <chem>O[C@@H]1C[C@H](OC)[C@@H](NC)CO1</chem>                         | Dehydrogenase<br>Decarboxylase<br>2,3-dehydratase<br>3-ketoreductase<br>4-aminotransferase<br>N-methyltransferase    |

**Supplementary Table 11** Potensimicin gene cluster analysis

| Locus           | Predicted Function                      | Strand | Amino Acids |
|-----------------|-----------------------------------------|--------|-------------|
| D459DRAFT_04885 | Glycosyltransferase                     | +      | 401         |
| D459DRAFT_04886 | Hypothetical protein                    | +      | 99          |
| D459DRAFT_04887 | Hypothetical protein                    | +      | 281         |
| D459DRAFT_04888 | Hypothetical protein                    | +      | 244         |
| D459DRAFT_04889 | NDP-hexose-2,3-dehydratase              | +      | 449         |
| D459DRAFT_04890 | dTDP-4-amino-4,6-transaminase           | +      | 374         |
| D459DRAFT_04891 | N,N-dimethyltransferase                 | +      | 247         |
| D459DRAFT_04892 | dTDP-4-dehydrorhamnose 3,5-epimerase    | +      | 228         |
| D459DRAFT_04893 | 4-ketoreductase                         | +      | 341         |
| D459DRAFT_04894 | Hypothetical protein                    | +      | 271         |
| D459DRAFT_04895 | AAA ATPase domain                       | -      | 989         |
| D459DRAFT_04896 | Polyketide synthase                     | +      | 4564        |
| D459DRAFT_04897 | Polyketide synthase                     | +      | 3658        |
| D459DRAFT_05970 | Polyketide synthase                     | +      | 1627        |
| D459DRAFT_05969 | Polyketide synthase                     | +      | 1353        |
| D459DRAFT_04117 | Beta-glucosidase-related glycosidase    | +      | 485         |
| D459DRAFT_04116 | Cytochrome P450                         | +      | 399         |
| D459DRAFT_04115 | Glycosyltransferase                     | +      | 424         |
| D459DRAFT_04114 | N,N-dimethyltransferase                 | +      | 239         |
| D459DRAFT_04113 | Beta-glucosidase-related glycosidase    | +      | 793         |
| D459DRAFT_04112 | MFS / Sugar transport protein           | +      | 418         |
| D459DRAFT_04111 | Phosphohydrolase                        | -      | 281         |
| D459DRAFT_04110 | Glucose-1-phosphate thymidyltransferase | +      | 285         |
| D459DRAFT_04109 | dTDP-4-amino-4,6-dehydratase            | +      | 341         |
| D459DRAFT_04108 | 3,5-ketoisomerase                       | +      | 150         |
| D459DRAFT_04107 | dTDP-4-amino-4,6-transaminase           | +      | 389         |
| D459DRAFT_04106 | Adenine-N(6)-methyltransferase          | +      | 293         |

**Supplementary Table 12** NMR spectroscopic data for potensimicin (7) (700 MHz, in DMSO-*d*<sub>6</sub>)<sup>a</sup>.

| Position | $\delta_{\text{H}}$ (mult.) | $\delta_{\text{C}}$ | Position | $\delta_{\text{H}}$ (mult.)        | $\delta_{\text{C}}$ |
|----------|-----------------------------|---------------------|----------|------------------------------------|---------------------|
| 1        | 0.80 ( <i>t</i> , 7.30)     | 9.36                | 14       | 3.78 ( <i>m</i> )                  | 79.42               |
| 2a       | 1.54 ( <i>m</i> )           | 22.50               | 15       | 2.83 ( <i>quint.</i> , 7.19, 7.37) | 48.72               |
| 2b       | 1.54 ( <i>m</i> )           |                     | 16       | 1.22 ( <i>d</i> , 7.32)            | 12.7                |
| 3        | 4.83 ( <i>m</i> )           | 76.5                | 17       | -                                  | 208.17              |
| 4        | 2.63 ( <i>m</i> )           | 37.1                | 18       | 3.96 ( <i>quart.</i> , 6.74, 6.89) | 49.1                |
| 5        | 0.98 ( <i>d</i> , 6.02)     | 10.03               | 19       | 1.15 ( <i>d</i> , 6.84)            | 13.84               |
| 6        | 6.64 ( <i>m</i> )           | 126.1               | 20       | -                                  | 169.25              |
| 7        | 6.14 ( <i>d</i> , 14.2)     | 146.8               | 1'       | 4.17 ( <i>d</i> , 7.06)            | 102.8               |
| 8        | -                           | 201.95              | 2'       | 3.23 ( <i>t</i> , 8.91)            | 68.17               |
| 9        | 2.51 ( <i>ov</i> )          | 41.93               | 3'       | 2.44 ( <i>ov</i> )                 | 70.0                |
| 10       | 1.00 ( <i>d</i> , 6.81)     | 15.07               | 4'       | 2.49 ( <i>ov</i> )                 | 40.73               |
| 11a      | 1.49 ( <i>m</i> )           | 34.37               | 5'       | 2.49 ( <i>ov</i> )                 | 40.73               |
| 11b      | 1.08 ( <i>m</i> )           |                     | 6'       | 3.05 ( <i>t</i> , 9.31)            | 69.1                |
| 12       | -                           | -                   | 7'       | 3.19 ( <i>quint.</i> , 5.64, 6.84) | 71.5                |
| 13       | 0.87 ( <i>d</i> , 6.58)     | 16.00               | 8'       | 1.12 ( <i>d</i> , 5.94)            | 16.96               |

<sup>a</sup>Chemical shift  $\delta$  and (multiplicity, *J* in Hz).

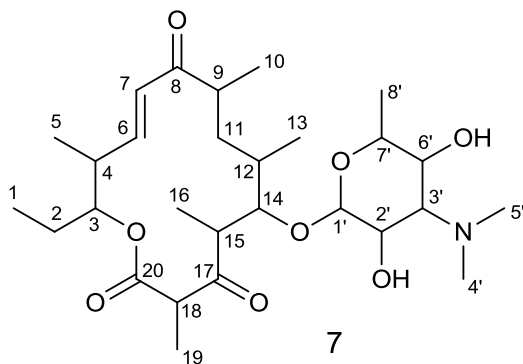



**Supplementary Table 13** NMR spectroscopic data for potensimicin (7) (700 MHz, in CDCl<sub>3</sub>)<sup>a</sup>.

| Position | $\delta_{\text{H}}$ (mult.) | $\delta_{\text{C}}$ | Position | $\delta_{\text{H}}$ (mult.) | $\delta_{\text{C}}$ |
|----------|-----------------------------|---------------------|----------|-----------------------------|---------------------|
| 1        | 0.79 ( <i>m</i> )           | 9.95                | 14       | 3.98 ( <i>m</i> )           | 78.56               |
| 2a       | 1.43 ( <i>ov</i> )          | 22.48               | 15       | 2.78 ( <i>m</i> )           | 48.57               |
| 2b       | 1.48 ( <i>ov</i> )          |                     | 16       | 1.21 ( <i>ov</i> )          | 13.1                |
| 3        | 4.79 ( <i>m</i> )           | 77.9                | 17       | -                           | 207.86              |
| 4        | 2.6 ( <i>ov</i> )           | 37.77               | 18       | 3.75 ( <i>m</i> )           | 49.93               |
| 5        | 0.98 ( <i>m</i> )           | 11.58               | 19       | 1.21 ( <i>ov</i> )          | 13.92               |
| 6        | 6.56 ( <i>d</i> , 13.45)    | 146.83              | 20       | -                           | 168.82              |
| 7        | 5.99 ( <i>d</i> , 14.7)     | 126.84              | 1'       | 4.22 ( <i>m</i> )           | 103.38              |
| 8        | -                           | 202.59              | 2'       | 3.35 ( <i>m</i> )           | 69.04               |
| 9        | 2.59 ( <i>ov</i> )          | 41.61               | 3'       | 2.53 ( <i>ov</i> )          | 70.93               |
| 10       | 0.97 ( <i>m</i> )           | 15.12               | 4'       | 2.56 ( <i>ov</i> )          | 41.21               |
| 11a      | 1.38 ( <i>ov</i> )          | 35.94               | 5'       | 2.56 ( <i>ov</i> )          | 41.21               |
| 11b      | 1.07 ( <i>m</i> )           |                     | 6'       | 3.11 ( <i>m</i> )           | 69.66               |
| 12       | 1.5 ( <i>ov</i> )           | 35.64               | 7'       | 3.22 ( <i>m</i> )           | 72.5                |
| 13       | 0.87 ( <i>m</i> )           | 16.51               | 8'       | 1.16 ( <i>m</i> )           | 17.22               |

<sup>a</sup>Chemical shift  $\delta$  and (multiplicity, *J* in Hz).

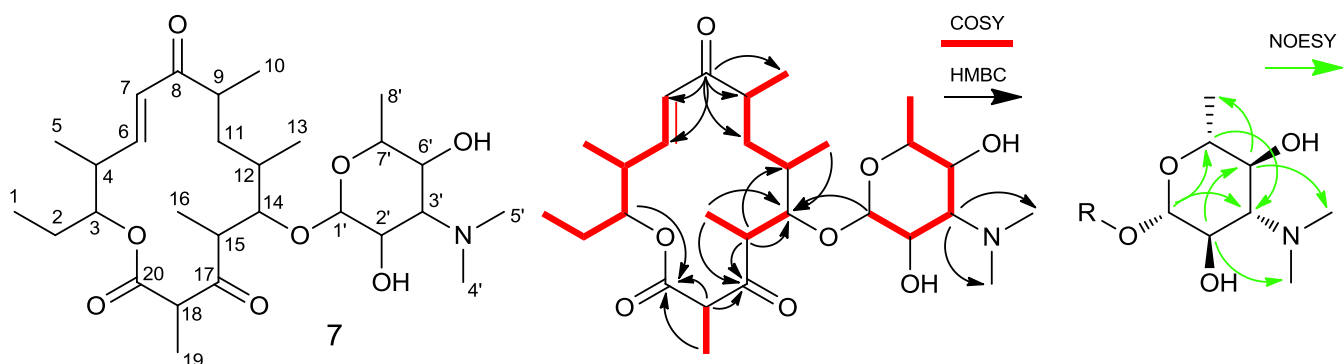

**Supplementary Table 14** Minimum inhibitory concentrations (MICs) of potensimicin and thanamycin.

|              | <i>B. subtilis</i> 168 | <i>S. aureus</i> Newman |
|--------------|------------------------|-------------------------|
| Potensimicin | 2 µg/mL                | 8 µg/mL                 |
| Erythromycin | 0.125 µg/mL            | 0.5 µg/mL               |

|                | <i>S. cerevisiae</i> |
|----------------|----------------------|
| Thanamycin     | 0.0625 µg/mL         |
| Syringomycin E | 2 µg/mL              |

**Supplementary Table 15** Detection of natural product standards at low concentrations.

| Natural Product | Class                   | Concentration (µg/mL) | Detected Scans | Avg. P1 | Avg. P2 |
|-----------------|-------------------------|-----------------------|----------------|---------|---------|
| Daptomycin      | Lipodepsipeptide        | 1                     | 3              | 37.0    | 26.5    |
| Erythromycin    | Glycosylated polyketide | 1                     | 6              | 23.3    | 17.4    |
| Thiostrepton    | Ribosomal thiopeptide   | 1                     | 3              | 7.1     | 12.6    |
| Lincomycin      | Lincosamide             | 1                     | 7              | 8.8     | 18.3    |
| Novobiocin      | Coumarin                | 1                     | 4              | 57.9    | 23.2    |
| Vancomycin      | Glycopeptide            | 1                     | 7              | 45.8    | 49.0    |
| Capreomycin     | Cyclic peptide          | 10                    | 5              | 7.3     | 9.5     |
| Nystatin        | Glycosylated polyketide | 1                     | 4              | 35      | 9.7     |
| Bacitracin      | Branched cyclic peptide | 1                     | 2              | 22.8    | 34.2    |
| Gramicidin A    | Nonribosomal peptide    | 1                     | 8              | 40.9    | 40.4    |
| Polymyxin B     | Branched cyclic peptide | 1                     | 3              | 24.5    | 30.3    |
| Valinomycin     | Cyclic depsipeptide     | 1                     | 7              | 24.8    | 16.0    |

**Supplementary Table 16** Thanamycin gene cluster analysis

| Locus | Predicted Function                 | Strand | Amino Acids |
|-------|------------------------------------|--------|-------------|
| ThaE  | Cyclic peptide ABC transporter     | -      | 566         |
| ThaF  | SyrP hydroxylase                   | -      | 353         |
| ThaC1 | NRPS                               | +      | 615         |
| ThaC2 | Chlorinating enzyme                | +      | 312         |
| ThaD  | Thioesterase                       | +      | 415         |
| ThaG  | Branched chain amino acid permease | +      | 233         |
| ThaH  | Branched chain amino acid permease | +      | 104         |
| ThaI  | AraC family transcription factor   | +      | 172         |
| ThaJ  | putative beta hydroxylase          | -      | 204         |
| ThaK  | MFS transporter                    | -      | 457         |
| ThaL  | putative transcription factor      | -      | 335         |
| ThaA  | NRPS                               | +      | 5380        |
| ThaB  | NRPS                               | +      | 4236        |

**Supplementary Table 17** NMR spectroscopic data for thanamycin (8) (700 MHz, in DMSO- $d_6$ )<sup>a</sup>.

| Position | $\delta_H$ mult.         | $\delta_C$ | Position | $\delta_H$ mult.       | $\delta_C$ |
|----------|--------------------------|------------|----------|------------------------|------------|
| 1        | 0.84 ( <i>t</i> , 6.1)   | 14         | 34a      | 3.36 ( <i>m</i> )      | 57.46      |
| 2        | 1.24 ( <i>ov</i> )       | 22.17      | 34b      | 3.3 ( <i>m</i> )       | -          |
| 3        | 1.21 ( <i>ov</i> )       | 31.38      | 35a      | 2.03 ( <i>m</i> )      | 33.33      |
| 4-10     | 1.23 ( <i>ov</i> )       | 29.17      | 35b      | 1.84 ( <i>ov</i> )     | -          |
| 11a      | 1.4 ( <i>ov</i> )        | 25.42      | 36       | 4.09 ( <i>m</i> )      | 51.92      |
| 11b      | 1.2 ( <i>ov</i> )        | -          | 37       | -                      | 172.78     |
| 12a      | 1.48 ( <i>m</i> , 11.7)  | 32.87      | 38       | 8.05 ( <i>ov</i> )     | -          |
| 12b      | 1.2 ( <i>ov</i> )        | -          | 39       | 8.97 ( <i>s</i> )      | 133.82     |
| 13       | 3.18 ( <i>m</i> )        | 73.57      | 40       | 7.24 ( <i>s</i> )      | 116.9      |
| 14       | 3.56 ( <i>m</i> )        | 71.63      | 41       | -                      | 129.4      |
| 15a      | 2.36 ( <i>d</i> , 13.8)  | 39.15      | 42a      | 3.23 ( <i>m</i> )      | 26.96      |
| 15b      | 2.14 ( <i>dd</i> , 10.6) | -          | 42b      | 2.98 ( <i>m</i> )      | -          |
| 16       | -                        | 171.81     | 43       | 4.71 ( <i>ov</i> )     | 51.01      |
| 17       | 7.7 ( <i>ov</i> )        | -          | 44       | -                      | 171.85     |
| 18a      | 4.38 ( <i>m</i> )        | 63.89      | 45       | 8.07 ( <i>ov</i> )     | -          |
| 18b      | 4.16 ( <i>ov</i> )       | -          | 46       | 1.19 ( <i>ov</i> )     | 20.61      |
| 19       | 4.66 ( <i>m</i> )        | 50.68      | 47       | 3.84 ( <i>m</i> )      | 66.59      |
| 20       | -                        | 168.64     | 48       | 4.18 ( <i>ov</i> )     | 60.17      |
| 21       | 9.04 ( <i>s</i> )        | -          | 49       | -                      | 170.42     |
| 22       | 7.85 ( <i>ov</i> )       | -          | 50       | 9.65 ( <i>s</i> )      | -          |
| 23a      | 2.76 ( <i>m</i> )        | 38.85      | 51       | 1.67 ( <i>d</i> , 5.6) | 13.07      |
| 23b      | 2.76 ( <i>m</i> )        | -          | 52       | 6.47 ( <i>m</i> )      | 129.78     |
| 24a      | 1.63 ( <i>ov</i> )       | 20.98      | 53       | -                      | 131.7      |
| 24b      | 1.44 ( <i>ov</i> )       | -          | 54       | -                      | 163.69     |
| 25a      | 1.8 ( <i>m</i> )         | 35.33      | 55       | 7.62 ( <i>ov</i> )     | -          |
| 25b      | 1.74 ( <i>m</i> )        | -          | 56       | -                      | 169.47     |
| 26       | -                        | 81.31      | 57       | 4.69 ( <i>ov</i> )     | 71.38      |
| 27       | -                        | 171.8      | 58       | 4.94 ( <i>m</i> )      | 55.61      |
| 28       | 8.21 ( <i>ov</i> )       | -          | 59       | -                      | 169.33     |
| 29       | -                        | 173.03     | 60       | 7.94 ( <i>ov</i> )     | -          |
| 30a      | 2.71 ( <i>ov</i> )       | 36.43      | 61a      | 3.51 ( <i>m</i> )      | 45.61      |
| 30b      | 2.48 ( <i>ov</i> )       | -          | 61b      | 3.41 ( <i>m</i> )      | -          |
| 31       | 4.56 ( <i>m</i> )        | 49.67      | 62       | 4.2 ( <i>ov</i> )      | 71.2       |
| 32       | -                        | 170.36     | 63       | 4.78 ( <i>d</i> , 7.5) | 54.3       |
| 33       | 7.89 ( <i>ov</i> )       | -          | 64       | -                      | 170.54     |

<sup>a</sup>Chemical shift  $\delta$  and (multiplicity,  $J$  in Hz).

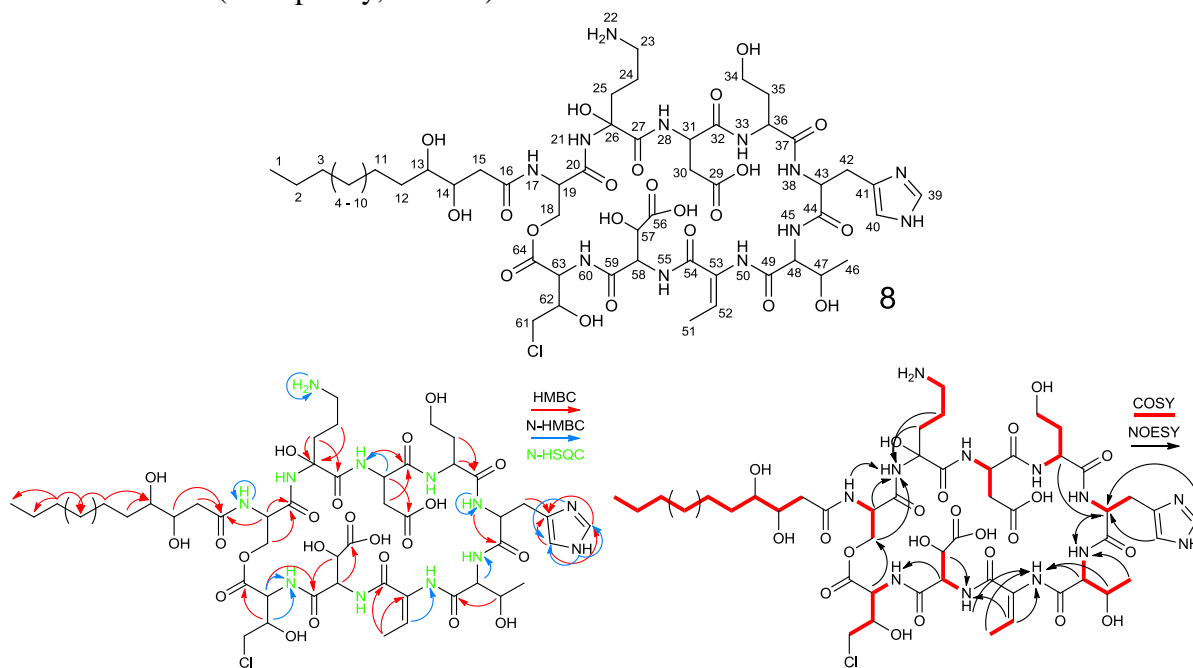

## Supplementary Note 1 Structure elucidation

### High Resolution Mass Spectra

A stock solution of 20 mg/mL of each compound was diluted to a final concentration of 10  $\mu\text{g/mL}$  in water with 0.1% formic acid. This solution was directly infused at a rate of  $\sim 3 \mu\text{L}$  per min into a Thermo Finnigan LTQ OrbiTrap XL mass spectrometer running Xcaliber 2.07 and TunePlus 2.4 SP1. High resolution MS was acquired using an electrospray ionization source and fragmentation was obtained through collision induced dissociation (CID). The instrument was operated in the positive mode using a maximum resolution of 100,000. Data was acquired for approximately 1 min.

### Mass Spectra Fragmentation

Mass spectral fragmentation patterns are shown for acidobactins, vacidobactins, and variobactin below.

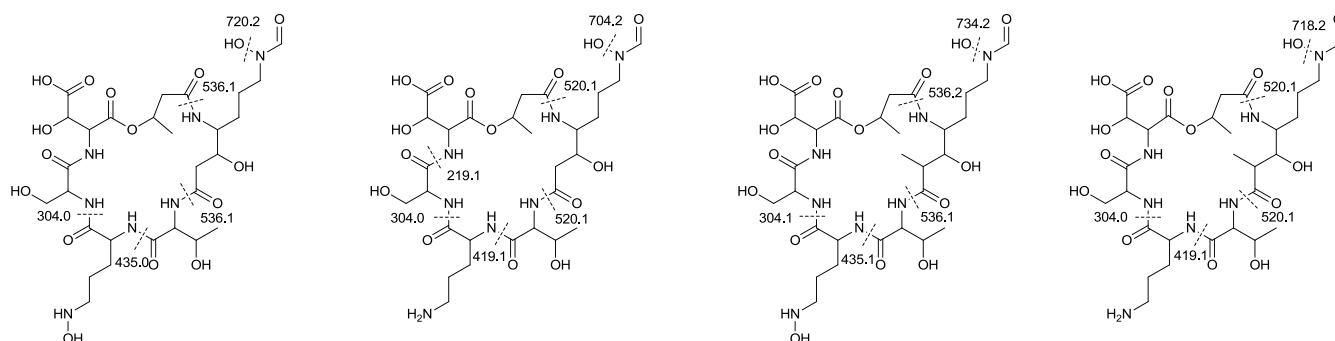

Acidobactin A (2)

Acidobactin B (3)

Vacidobactin A (4)

Vacidobactin B (5)

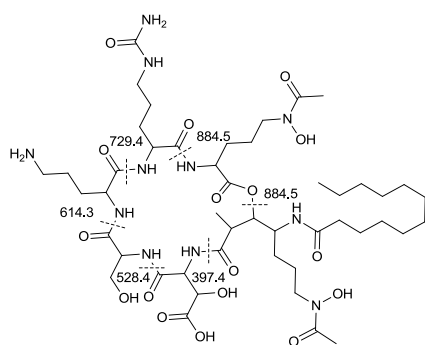

Variobactin A (6)

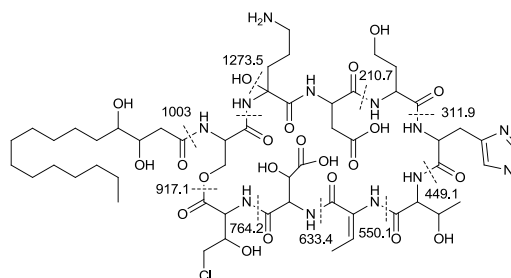

Thanamycin (8)

### NMR Methods and Structural Characterization

NMR spectra were measured on a Bruker Avance 700 spectrometer equipped with a 5 mm inverse detection probe and using TMS as an internal standard. Lyophilized samples were dissolved in  $\text{D}_2\text{O}$ ,

CDCl<sub>3</sub>, or *d*<sub>6</sub>-DMSO (*Sigma Aldrich*) and spectra were recorded at 297 K. NMR experiments were processed and analyzed with Bruker TOPSPIN 2.1 or MestReNova 9.0. Chemical shifts ( $\delta$ ) expressed in parts per million (ppm) and coupling constants (*J*) are reported in Hertz (Hz). Assembly of individual amino acids to form the final linear structure was accomplished by considering long-range <sup>1</sup>H-<sup>1</sup>H NOESY and ROESY correlations, and <sup>1</sup>H-<sup>13</sup>C HMBC correlations from protons adjacent carbonyl carbons, as well as by assignments of 2D <sup>1</sup>H-<sup>1</sup>H COSY and 2D <sup>1</sup>H-<sup>13</sup>C HSQC correlations.

**Supplementary note 2** – The sugar prediction algorithm is represented by the following pseudocode:

```
n = number of glycosyltransferases in cluster
for glycosyltransferase in cluster glycosyltransferases
    if glycosyltransferase substrate == hexose
        n--
minimum remaining in pathway = 999;
minimum remaining in cluster = 999;

sugar combinations = get all combinations of sugars of size n

for sugar combination in sugar combinations
    remainingInCluster = number of cluster sugar genes
    remainingInPathway = number of pathway sugar genes

    for pathway sugar gene in pathway sugar genes
        if cluster genes contain pathway sugar gene
            remainingInPathway--

    for cluster sugar gene in cluster sugar genes
        if pathway genes contain cluster sugar genes
            remainingInPathway--
```

```
if remaining in pathway <= minimum remaining in pathway
    and remaining in cluster <= minimum remaining in cluster
    if remaining in pathway < minimum remaining in pathway
        or remaining in cluster < minimum remaining in cluster
        clear combinatorial sugar set
    minimum remaining in pathway = remaining in pathway
    minimum remaining in cluster = remaining in cluster
    add sugar combination to combinatorial sugar set

return combinatorial sugar set
```
